# Supplementary material for: Coupling of T cell receptor specificity to natural killer T cell development by bivalent histone H3 methylation
Source: PubMed Central journal article supplement — J Exp Med. 2015 Mar 9;212(3):297–306. doi: 10.1084/jem.20141499 (PMC4354372; doi:10.1084/jem.20141499), 2015-03-09
Supplement: supp_jem.20141499_JEM_20141499_TableS1.pdf [file supp_jem.20141499_JEM_20141499_TableS1.pdf]

**Table S1.** Four categories of genes separated by the epigenetic marks at their TSS (in bold)

|                              |               |               |
|------------------------------|---------------|---------------|
| <b>H3K4me3<sup>lo</sup></b>  | 1700102P08Rik | 4930538K18Rik |
| <b>H3K27me3<sup>lo</sup></b> | 1700109H08Rik | 4930539E08Rik |
| 0610010O12Rik                | 1700122O11Rik | 4930544O15Rik |
| 1110014N23Rik                | 1700123I01Rik | 4930548H24Rik |
| 1110017D15Rik                | 1700125H20Rik | 4930550L24Rik |
| 1110054O05Rik                | 1810012P15Rik | 4930562C15Rik |
| 1500015O10Rik                | 2010002M12Rik | 4930562F07Rik |
| 1600029D21Rik                | 2010107G12Rik | 4930578C19Rik |
| 1700001J03Rik                | 2010109I03Rik | 4930579C15Rik |
| 1700001K19Rik                | 2010111I01Rik | 4930590J08Rik |
| 1700001K23Rik                | 2210009G21Rik | 4931417G12Rik |
| 1700001P01Rik                | 2210010C04Rik | 4931440F15Rik |
| 1700003F12Rik                | 2210010C17Rik | 4932412H11Rik |
| 1700007I08Rik                | 2310003F16Rik | 4932425I24Rik |
| 1700007K09Rik                | 2310007L24Rik | 4933402D24Rik |
| 1700011E24Rik                | 2310014L17Rik | 4933407L21Rik |
| 1700012L04Rik                | 2310035K24Rik | 4933408B17Rik |
| 1700016C15Rik                | 2310042D19Rik | 4933413G19Rik |
| 1700016D06Rik                | 2310046K01Rik | 4933422H20Rik |
| 1700018L24Rik                | 2410076I21Rik | 4933425L06Rik |
| 1700019D03Rik                | 2510049J12Rik | 4933425O20Rik |
| 1700019L03Rik                | 2610028H24Rik | 4933430H15Rik |
| 1700019O17Rik                | 3200002M19Rik | 4933437F05Rik |
| 1700020A23Rik                | 3230401D17Rik | 5430411K18Rik |
| 1700020C07Rik                | 3830403N18Rik | 5430427O19Rik |
| 1700022I11Rik                | 4921501E09Rik | 5430435G22Rik |
| 1700026J04Rik                | 4921515J06Rik | 5830411N06Rik |
| 1700027A23Rik                | 4921523A10Rik | 6030422M02Rik |
| 1700028K03Rik                | 4930402F06Rik | 6430531B16Rik |
| 1700029H14Rik                | 4930404N11Rik | 8430423G03Rik |
| 1700029I15Rik                | 4930407I10Rik | 9030617O03Rik |
| 1700029J11Rik                | 4930417G10Rik | 9130017N09Rik |
| 1700029P11Rik                | 4930486L24Rik | A130010J15Rik |
| 1700034I23Rik                | 4930503B20Rik | A3galt2       |
| 1700061G19Rik                | 4930511I11Rik | A430105I19Rik |
| 1700061J05Rik                | 4930511M11Rik | A630001G21Rik |
| 1700067P10Rik                | 4930526D03Rik | A830080D01Rik |
| 1700094D03Rik                |               |               |

A930005I04Rik  
AA986860  
Aanat  
Abca9  
Abcc9  
Abcg2  
Abcg8  
Abra  
Acacb  
Acad11  
Acat3  
Accn3  
Acer3  
Acnat1  
Acot10  
Acot11  
Acox2  
Acpt  
Acrbp  
Acsbg2  
Acsm3  
Acta2  
Actc1  
Actg2  
Actr1b  
Acy3  
Adam1a  
Adam1b  
Adam21  
Adam30  
Adam4  
Adam6b  
Adam8  
Adamts13  
Adamts16  
Adamts20  
Adamtsl2  
Adcy10  
Adcy4  
Adcy7  
Adig  
Adipor2  
Adora3

Adprh1  
AF251705  
Afp  
Ager  
Agmat  
Agt  
Agxt2l1  
Al182371  
Al428936  
Aif1  
Aifm3  
Aim1  
Aim1l  
Aim2  
Aipl1  
Ak1  
Ak7  
Akap14  
Akap2  
Akap3  
Akap8l  
Akr1b8  
Akr1c13  
Alas2  
Aldh1l1  
Aldh3b1  
Aldh8a1  
Aldob  
Aldoc  
Alox5ap  
Alpk3  
Amd1  
Amd2  
Amhr2  
Amica1  
Amigo3  
Ampd1  
Amt  
Amy1  
Amz1  
Angel2  
Angpt4  
Angptl1

Angptl3  
Angptl7  
Ankdd1b  
Ankmy1  
Ankrd22  
Ankrd23  
Ankrd61  
Ankrd7  
Anks1b  
Anxa9  
Aoc2  
Aoc3  
Aox3l1  
Ap1m2  
Aplnr  
Apoa1  
Apobec2  
Apoc1  
Apol10b  
Apol6  
Apol7b  
Apol8  
Apom  
Apon  
Aqp1  
Aqp4  
Aqp7  
Aqr  
Arap3  
Arg1  
Arhgap32  
Arhgap40  
Arhgef10l  
Arhgef15  
Arhgef18  
Arhgef4  
Arhgef5  
Arhgef9  
Arl11  
Arl13a  
Arl13b  
Arl9  
Arrdc5

|                      |                      |                  |
|----------------------|----------------------|------------------|
| <i>Asap1</i>         | <i>Bcas1</i>         | <i>Cacna1d</i>   |
| <i>Asb14</i>         | <i>Bckdhb</i>        | <i>Cacng1</i>    |
| <i>Asb2</i>          | <i>Bcl2l14</i>       | <i>Calml3</i>    |
| <i>Asb4</i>          | <i>Bcl2l15</i>       | <i>Calml4</i>    |
| <i>Asgr1</i>         | <i>Bcl9l</i>         | <i>Calr4</i>     |
| <i>Ash1l</i>         | <i>Bco2</i>          | <i>Camk1</i>     |
| <i>Ash2l</i>         | <i>Bdh1</i>          | <i>Camk1g</i>    |
| <i>Aspa</i>          | <i>Bdkrb1</i>        | <i>Camk2a</i>    |
| <i>Aspn</i>          | <i>Bdp1</i>          | <i>Camp</i>      |
| <i>Atp11c</i>        | <i>Best1</i>         | <i>Capg</i>      |
| <i>Atp1b4</i>        | <i>Bfsp2</i>         | <i>Capn11</i>    |
| <i>Atp2a1</i>        | <i>Bglap-rs1</i>     | <i>Capn12</i>    |
| <i>Atp4a</i>         | <i>Bhlha15</i>       | <i>Capn3</i>     |
| <i>Atp4b</i>         | <i>Blk</i>           | <i>Capn9</i>     |
| <i>Atp6v1b1</i>      | <i>Blnk</i>          | <i>Car5b</i>     |
| <i>Atp6v1c2</i>      | <i>Bloc1s2</i>       | <i>Card14</i>    |
| <i>Atp8a2</i>        | <i>Bnipl</i>         | <i>Card6</i>     |
| <i>Atp8b4</i>        | <i>Brd3</i>          | <i>Card9</i>     |
| <i>Avil</i>          | <i>Brdt</i>          | <i>Casc3</i>     |
| <i>Avpr2</i>         | <i>Bri3</i>          | <i>Cask</i>      |
| <i>AW112010</i>      | <i>Brs3</i>          | <i>Casp1</i>     |
| <i>Awat2</i>         | <i>Bst1</i>          | <i>Casq1</i>     |
| <i>Axl</i>           | <i>Btbd16</i>        | <i>Cass4</i>     |
| <i>AY358078</i>      | <i>Btla</i>          | <i>Catsper3</i>  |
| <i>B3galt2</i>       | <i>Btnl2</i>         | <i>Catsperg1</i> |
| <i>B3galt5</i>       | <i>C030019I05Rik</i> | <i>Cbx7</i>      |
| <i>B3gnt6</i>        | <i>C030030A07Rik</i> | <i>Cc2d2a</i>    |
| <i>B430306N03Rik</i> | <i>C130050O18Rik</i> | <i>Ccdc11</i>    |
| <i>Baat</i>          | <i>C1qb</i>          | <i>Ccdc135</i>   |
| <i>Baiap2l2</i>      | <i>C1qtnf1</i>       | <i>Ccdc144b</i>  |
| <i>Baiap3</i>        | <i>C1qtnf3</i>       | <i>Ccdc154</i>   |
| <i>Bank1</i>         | <i>C1qtnf5</i>       | <i>Ccdc162</i>   |
| <i>BC017612</i>      | <i>C1qtnf6</i>       | <i>Ccdc27</i>    |
| <i>BC018242</i>      | <i>C1qtnf9</i>       | <i>Ccdc63</i>    |
| <i>BC018507</i>      | <i>C1ra</i>          | <i>Ccdc73</i>    |
| <i>BC021614</i>      | <i>C3</i>            | <i>Ccdc76</i>    |
| <i>BC021785</i>      | <i>C330021F23Rik</i> | <i>Ccdc89</i>    |
| <i>BC026585</i>      | <i>C3ar1</i>         | <i>Ccl17</i>     |
| <i>BC032203</i>      | <i>C4b</i>           | <i>Ccl22</i>     |
| <i>BC048507</i>      | <i>C77080</i>        | <i>Ccl4</i>      |
| <i>BC048562</i>      | <i>Cabp4</i>         | <i>Ccl5</i>      |
| <i>BC051019</i>      | <i>Cacna1a</i>       | <i>Ccl6</i>      |
| <i>BC051070</i>      | <i>Cacna1c</i>       | <i>Ccnb1ip1</i>  |

|                 |                 |                |
|-----------------|-----------------|----------------|
| <i>Ccr2</i>     | <i>Ceacam2</i>  | <i>Cnga1</i>   |
| <i>Ccr5</i>     | <i>Ceacam20</i> | <i>Cnksr1</i>  |
| <i>Ccr8</i>     | <i>Cela1</i>    | <i>Cnot7</i>   |
| <i>Ccrl1</i>    | <i>Celf2</i>    | <i>Cntnap2</i> |
| <i>Cct8l1</i>   | <i>Cetn1</i>    | <i>Coil</i>    |
| <i>Cd101</i>    | <i>Cfb</i>      | <i>Col10a1</i> |
| <i>Cd160</i>    | <i>Cfd</i>      | <i>Col17a1</i> |
| <i>Cd163</i>    | <i>Cfi</i>      | <i>Col1a2</i>  |
| <i>Cd163l1</i>  | <i>Cfp</i>      | <i>Col20a1</i> |
| <i>Cd177</i>    | <i>Chd8</i>     | <i>Col28a1</i> |
| <i>Cd19</i>     | <i>Chgb</i>     | <i>Col3a1</i>  |
| <i>Cd200</i>    | <i>Chml</i>     | <i>Col4a6</i>  |
| <i>Cd200r4</i>  | <i>Chmp4b</i>   | <i>Col6a6</i>  |
| <i>Cd209a</i>   | <i>Chrm4</i>    | <i>Col9a3</i>  |
| <i>Cd209d</i>   | <i>Chrna10</i>  | <i>Colec11</i> |
| <i>Cd209e</i>   | <i>Chrna2</i>   | <i>Colq</i>    |
| <i>Cd226</i>    | <i>Chrne</i>    | <i>Cort</i>    |
| <i>Cd244</i>    | <i>Chst3</i>    | <i>Cox4i2</i>  |
| <i>Cd276</i>    | <i>Chst4</i>    | <i>Cox6a2</i>  |
| <i>Cd28</i>     | <i>Cib3</i>     | <i>Cox7a1</i>  |
| <i>Cd300lf</i>  | <i>Ciita</i>    | <i>Cp</i>      |
| <i>Cd300lg</i>  | <i>Cilp</i>     | <i>Cpa3</i>    |
| <i>Cd53</i>     | <i>Ckm</i>      | <i>Cpsf4l</i>  |
| <i>Cd59a</i>    | <i>Clcn1</i>    | <i>Cpt1b</i>   |
| <i>Cd5l</i>     | <i>Cldn15</i>   | <i>Cpt1c</i>   |
| <i>Cd68</i>     | <i>Cldn19</i>   | <i>Cr2</i>     |
| <i>Cd7</i>      | <i>Clec10a</i>  | <i>Crb1</i>    |
| <i>Cd72</i>     | <i>Clec12a</i>  | <i>Creb3l3</i> |
| <i>Cd74</i>     | <i>Clec1b</i>   | <i>Creb3l4</i> |
| <i>Cd79a</i>    | <i>Clec2e</i>   | <i>Crim1</i>   |
| <i>Cd80</i>     | <i>Clec2g</i>   | <i>Crtam</i>   |
| <i>Cd93</i>     | <i>Clec3b</i>   | <i>Cryba1</i>  |
| <i>Cdca7l</i>   | <i>Clec4a1</i>  | <i>Crybg3</i>  |
| <i>Cdcp2</i>    | <i>Clec4a2</i>  | <i>Crygn</i>   |
| <i>Cdh10</i>    | <i>Clec4f</i>   | <i>Csad</i>    |
| <i>Cdh15</i>    | <i>Clic3</i>    | <i>Csdc2</i>   |
| <i>Cdh23</i>    | <i>Clip3</i>    | <i>Csf2rb</i>  |
| <i>Cdh5</i>     | <i>Cln8</i>     | <i>Csf3</i>    |
| <i>Cdhr2</i>    | <i>Clstn3</i>   | <i>Csf3r</i>   |
| <i>Cdk15</i>    | <i>Cltb</i>     | <i>Csl</i>     |
| <i>Cdyl</i>     | <i>Cluap1</i>   | <i>Csmd1</i>   |
| <i>Ceacam1</i>  | <i>Cmb1</i>     | <i>Csn2</i>    |
| <i>Ceacam16</i> | <i>Cmya5</i>    | <i>Csrp1</i>   |

|                      |                      |                      |
|----------------------|----------------------|----------------------|
| <i>Cst6</i>          | <i>Dbh</i>           | <i>E230025N22Rik</i> |
| <i>Cst7</i>          | <i>Dcaf12l1</i>      | <i>Ecm1</i>          |
| <i>Csta</i>          | <i>Dcaf4</i>         | <i>Ecm2</i>          |
| <i>Ctf1</i>          | <i>Dcun1d1</i>       | <i>Ednra</i>         |
| <i>Ctla2a</i>        | <i>Dcun1d4</i>       | <i>Efcab4b</i>       |
| <i>Ctla4</i>         | <i>Ddc</i>           | <i>Efcab5</i>        |
| <i>Ctnnb1</i>        | <i>Dennd2c</i>       | <i>Egfl7</i>         |
| <i>Ctrl</i>          | <i>Dennd4a</i>       | <i>Egfl8</i>         |
| <i>Ctsk</i>          | <i>Dgcr6</i>         | <i>Ehbp1</i>         |
| <i>Ctss</i>          | <i>Dgkd</i>          | <i>Eif2c4</i>        |
| <i>Ctsw</i>          | <i>Dhx32</i>         | <i>Eif4ebp3</i>      |
| <i>Cubn</i>          | <i>Dixdc1</i>        | <i>Eif4g1</i>        |
| <i>Cul4b</i>         | <i>Dkk4</i>          | <i>Elane</i>         |
| <i>Cuzd1</i>         | <i>Dlg2</i>          | <i>Elavl3</i>        |
| <i>Cx3cr1</i>        | <i>Dmbt1</i>         | <i>Elf5</i>          |
| <i>Cxcl10</i>        | <i>Dnahc17</i>       | <i>Elmo3</i>         |
| <i>Cxcr3</i>         | <i>Dnahc9</i>        | <i>Emr1</i>          |
| <i>Cxcr5</i>         | <i>Dnaja3</i>        | <i>Emr4</i>          |
| <i>Cxcr6</i>         | <i>Dnajb13</i>       | <i>Enthd1</i>        |
| <i>Cyb561</i>        | <i>Dnajb7</i>        | <i>Epb4.2</i>        |
| <i>Cybb</i>          | <i>Dnajc13</i>       | <i>Epgn</i>          |
| <i>Cym</i>           | <i>Dnajc25</i>       | <i>Epha1</i>         |
| <i>Cyp11a1</i>       | <i>Dnalc4</i>        | <i>Ephx1</i>         |
| <i>Cyp26c1</i>       | <i>Dnase1</i>        | <i>Ephx3</i>         |
| <i>Cyp2ab1</i>       | <i>Dnase1l2</i>      | <i>Eps15l1</i>       |
| <i>Cyp2d26</i>       | <i>Dnd1</i>          | <i>Eps8</i>          |
| <i>Cyp2j6</i>        | <i>Dnmbp</i>         | <i>Eps8l1</i>        |
| <i>Cyp2t4</i>        | <i>Dock9</i>         | <i>Eps8l2</i>        |
| <i>Cyp4f14</i>       | <i>Dok3</i>          | <i>Ermap</i>         |
| <i>Cyp4f15</i>       | <i>Dpep1</i>         | <i>Ern2</i>          |
| <i>Cyp4f16</i>       | <i>Dpep2</i>         | <i>Erp27</i>         |
| <i>Cyp4f18</i>       | <i>Dpm3</i>          | <i>Espnl</i>         |
| <i>Cysltr1</i>       | <i>Dpy19l1</i>       | <i>Ethe1</i>         |
| <i>Cyth4</i>         | <i>Drp2</i>          | <i>Ets1</i>          |
| <i>Cytip</i>         | <i>Dsg1a</i>         | <i>Evi2a</i>         |
| <i>D130043K22Rik</i> | <i>Dupd1</i>         | <i>Evi2b</i>         |
| <i>D17H6S56E-3</i>   | <i>Dus2l</i>         | <i>Evi5</i>          |
| <i>D1Pas1</i>        | <i>Dusp10</i>        | <i>Extl1</i>         |
| <i>D630037F22Rik</i> | <i>Dusp18</i>        | <i>Extl3</i>         |
| <i>D630039A03Rik</i> | <i>Dusp27</i>        | <i>F2</i>            |
| <i>D630045J12Rik</i> | <i>Dynll2</i>        | <i>F2rl2</i>         |
| <i>Dab2</i>          | <i>Dyrk4</i>         | <i>F5</i>            |
| <i>Dab2ip</i>        | <i>E030002O03Rik</i> | <i>Fabp4</i>         |

|                 |                |                |
|-----------------|----------------|----------------|
| <i>Fabp6</i>    | <i>Fgd2</i>    | <i>Ghrl</i>    |
| <i>Fam107b</i>  | <i>Fgd3</i>    | <i>Gigyf1</i>  |
| <i>Fam111a</i>  | <i>Fgf1</i>    | <i>Gimap3</i>  |
| <i>Fam115c</i>  | <i>Fgf22</i>   | <i>Gimap4</i>  |
| <i>Fam129c</i>  | <i>Fgf23</i>   | <i>Gimap5</i>  |
| <i>Fam132a</i>  | <i>Fgf7</i>    | <i>Gimap7</i>  |
| <i>Fam135a</i>  | <i>Filip1</i>  | <i>Gja10</i>   |
| <i>Fam160a1</i> | <i>Filip1l</i> | <i>Gja6</i>    |
| <i>Fam166a</i>  | <i>Flrt1</i>   | <i>Gk2</i>     |
| <i>Fam166b</i>  | <i>Flywch1</i> | <i>Glce</i>    |
| <i>Fam171a1</i> | <i>Fmn1</i>    | <i>Glipr1</i>  |
| <i>Fam178b</i>  | <i>Fndc1</i>   | <i>Glra4</i>   |
| <i>Fam183b</i>  | <i>Folr4</i>   | <i>Glt8d2</i>  |
| <i>Fam193a</i>  | <i>Foxi1</i>   | <i>Gltscr1</i> |
| <i>Fam196b</i>  | <i>Foxk2</i>   | <i>Gna15</i>   |
| <i>Fam198a</i>  | <i>Foxn3</i>   | <i>Gnb3</i>    |
| <i>Fam23a</i>   | <i>Foxp3</i>   | <i>Gne</i>     |
| <i>Fam24a</i>   | <i>Fpgs</i>    | <i>Gng2</i>    |
| <i>Fam26d</i>   | <i>Frmd7</i>   | <i>Gng7</i>    |
| <i>Fam38a</i>   | <i>Frrs1</i>   | <i>Gnmt</i>    |
| <i>Fam55d</i>   | <i>Fscn2</i>   | <i>Gnrh1</i>   |
| <i>Fam65b</i>   | <i>Fscn3</i>   | <i>Gnrhr</i>   |
| <i>Fam65c</i>   | <i>Fsd2</i>    | <i>Golga7b</i> |
| <i>Fam71b</i>   | <i>Fsip1</i>   | <i>Gp1ba</i>   |
| <i>Fam71f2</i>  | <i>Fxyd2</i>   | <i>Gp9</i>     |
| <i>Fancc</i>    | <i>Fxyd4</i>   | <i>Gpam</i>    |
| <i>Fap</i>      | <i>G6pd2</i>   | <i>Gpat2</i>   |
| <i>Far2</i>     | <i>Gabrr2</i>  | <i>Gpbar1</i>  |
| <i>Fblim1</i>   | <i>Gadl1</i>   | <i>Gpcpd1</i>  |
| <i>Fbrs</i>     | <i>Gal3st4</i> | <i>Gpd1</i>    |
| <i>Fbxl2</i>    | <i>Gapdhs</i>  | <i>Gpha2</i>   |
| <i>Fbxl5</i>    | <i>Gata1</i>   | <i>Gphb5</i>   |
| <i>Fbxo40</i>   | <i>Gatad2b</i> | <i>Gpld1</i>   |
| <i>Fcer1g</i>   | <i>Gatsl3</i>  | <i>Gpnmb</i>   |
| <i>Fcer2a</i>   | <i>Gbp11</i>   | <i>Gpr1</i>    |
| <i>Fcgbp</i>    | <i>Gcc1</i>    | <i>Gpr111</i>  |
| <i>Fcgr2b</i>   | <i>Gcnt2</i>   | <i>Gpr113</i>  |
| <i>Fcgr3</i>    | <i>Gcnt7</i>   | <i>Gpr115</i>  |
| <i>Fcgrt</i>    | <i>Gdpd2</i>   | <i>Gpr133</i>  |
| <i>Fcrla</i>    | <i>Gdpd3</i>   | <i>Gpr15</i>   |
| <i>Fcrlb</i>    | <i>Gfap</i>    | <i>Gpr151</i>  |
| <i>Fer1l4</i>   | <i>Ggt6</i>    | <i>Gpr152</i>  |
| <i>Ffar2</i>    | <i>Ghrh</i>    | <i>Gpr161</i>  |

|                |                  |                      |
|----------------|------------------|----------------------|
| <i>Gpr173</i>  | <i>H2-M10.2</i>  | <i>Hvcn1</i>         |
| <i>Gpr179</i>  | <i>H2-M2</i>     | <i>Hyal1</i>         |
| <i>Gpr18</i>   | <i>H2-Ob</i>     | <i>I830077J02Rik</i> |
| <i>Gpr182</i>  | <i>H2-T3</i>     | <i>Ibtk</i>          |
| <i>Gpr183</i>  | <i>Haao</i>      | <i>Icos</i>          |
| <i>Gpr21</i>   | <i>Hal</i>       | <i>Ide</i>           |
| <i>Gpr22</i>   | <i>Hamp</i>      | <i>Iffo2</i>         |
| <i>Gpr34</i>   | <i>Havcr2</i>    | <i>Ifi27l2a</i>      |
| <i>Gpr35</i>   | <i>Hba-a1</i>    | <i>Ifi30</i>         |
| <i>Gpr44</i>   | <i>Hba-a2</i>    | <i>Ifi47</i>         |
| <i>Gpr55</i>   | <i>Hbb-b1</i>    | <i>Ifit1</i>         |
| <i>Gpr56</i>   | <i>Hbb-b2</i>    | <i>Ifit3</i>         |
| <i>Gpr61</i>   | <i>Hc</i>        | <i>Ifitm2</i>        |
| <i>Gpr77</i>   | <i>Hdac4</i>     | <i>Ifitm3</i>        |
| <i>Gpr82</i>   | <i>Hdac9</i>     | <i>Ifitm5</i>        |
| <i>Gpr84</i>   | <i>Hdc</i>       | <i>Ifnz</i>          |
| <i>Gpr87</i>   | <i>Hemgn</i>     | <i>Igfals</i>        |
| <i>Gpr97</i>   | <i>Hepacam</i>   | <i>Igj</i>           |
| <i>Gprin3</i>  | <i>Hgfac</i>     | <i>Igll1</i>         |
| <i>Gpx8</i>    | <i>Hiat1</i>     | <i>Igsf6</i>         |
| <i>Gramd1c</i> | <i>Hif1a</i>     | <i>Igsf8</i>         |
| <i>Gramd3</i>  | <i>Hif3a</i>     | <i>Igsf9</i>         |
| <i>Grb7</i>    | <i>Higd1b</i>    | <i>Igp1</i>          |
| <i>Greb1l</i>  | <i>Higd1c</i>    | <i>Il13</i>          |
| <i>Grifin</i>  | <i>Hipk4</i>     | <i>Il16</i>          |
| <i>Grk1</i>    | <i>Hist1h2aa</i> | <i>Il17c</i>         |
| <i>Gsg1</i>    | <i>Hist1h2ba</i> | <i>Il18bp</i>        |
| <i>Gsta3</i>   | <i>Hk1</i>       | <i>Il18r1</i>        |
| <i>Gsta4</i>   | <i>Hk3</i>       | <i>Il1a</i>          |
| <i>Gstm7</i>   | <i>Hnf1a</i>     | <i>Il1r1</i>         |
| <i>Gtsf1l</i>  | <i>Hnf4a</i>     | <i>Il20rb</i>        |
| <i>Guca1a</i>  | <i>Homez</i>     | <i>Il23a</i>         |
| <i>Guca1b</i>  | <i>Hormad2</i>   | <i>Il2ra</i>         |
| <i>Gucy1b2</i> | <i>Hoxa5</i>     | <i>Il2rb</i>         |
| <i>Gulo</i>    | <i>Hpgd</i>      | <i>Il34</i>          |
| <i>Gykl1</i>   | <i>Hpgds</i>     | <i>Il5ra</i>         |
| <i>Gys2</i>    | <i>Hsd17b14</i>  | <i>Il7r</i>          |
| <i>Gzmm</i>    | <i>Hsd3b7</i>    | <i>Il9r</i>          |
| <i>H1foo</i>   | <i>Hsf5</i>      | <i>Impg1</i>         |
| <i>H2-Aa</i>   | <i>Hsp90aa1</i>  | <i>Impg2</i>         |
| <i>H2-DMb1</i> | <i>Hspa12b</i>   | <i>Inhbc</i>         |
| <i>H2-DMb2</i> | <i>Htr2b</i>     | <i>Inpp4b</i>        |
| <i>H2-Eb1</i>  | <i>Hus1b</i>     | <i>Inpp5j</i>        |

|                 |                |                |
|-----------------|----------------|----------------|
| <i>Insig2</i>   | <i>Klf12</i>   | <i>Lgals7</i>  |
| <i>Ins15</i>    | <i>Klhl30</i>  | <i>Lgals8</i>  |
| <i>Ip6k2</i>    | <i>Klhl38</i>  | <i>Lgi4</i>    |
| <i>Ipcef1</i>   | <i>Klk10</i>   | <i>Lhfp11</i>  |
| <i>Iqsec1</i>   | <i>Klk14</i>   | <i>Lhfp15</i>  |
| <i>Irf6</i>     | <i>Klk9</i>    | <i>Lifr</i>    |
| <i>Irgc1</i>    | <i>Klrb1c</i>  | <i>Lilrb3</i>  |
| <i>Islr</i>     | <i>Klrb1f</i>  | <i>Lim2</i>    |
| <i>Itga10</i>   | <i>Klrc1</i>   | <i>Lime1</i>   |
| <i>Itga2b</i>   | <i>Klre1</i>   | <i>Liph</i>    |
| <i>Itga6</i>    | <i>Klrg1</i>   | <i>Lipm</i>    |
| <i>Itgad</i>    | <i>Klrk1</i>   | <i>Lman1</i>   |
| <i>Itgae</i>    | <i>Kmo</i>     | <i>Lman1l</i>  |
| <i>Itgam</i>    | <i>Kncn</i>    | <i>Lmod1</i>   |
| <i>Itgax</i>    | <i>Krt222</i>  | <i>Lmod2</i>   |
| <i>Itgb1bp2</i> | <i>Krt28</i>   | <i>Lpar5</i>   |
| <i>Itgb1bp3</i> | <i>Krt4</i>    | <i>Lpcat2b</i> |
| <i>Itgb7</i>    | <i>Ktn1</i>    | <i>Lpin3</i>   |
| <i>Itih4</i>    | <i>Kynu</i>    | <i>Lfn1</i>    |
| <i>lyd</i>      | <i>L1cam</i>   | <i>Lrrc10</i>  |
| <i>Jph2</i>     | <i>Lair1</i>   | <i>Lrrc14b</i> |
| <i>Kcna10</i>   | <i>Lalba</i>   | <i>Lrrc19</i>  |
| <i>Kcnab1</i>   | <i>Lama4</i>   | <i>Lrrc25</i>  |
| <i>Kcnd1</i>    | <i>Lamb2</i>   | <i>Lrrc39</i>  |
| <i>Kcnip1</i>   | <i>Lamb3</i>   | <i>Lrrc66</i>  |
| <i>Kcnip3</i>   | <i>Lamp3</i>   | <i>Lrrn3</i>   |
| <i>Kcnip4</i>   | <i>Lass3</i>   | <i>Lrrn4cl</i> |
| <i>Kcnj13</i>   | <i>Lat2</i>    | <i>Lrrtm2</i>  |
| <i>Kcnj14</i>   | <i>Lats1</i>   | <i>Lsr</i>     |
| <i>Kcnj16</i>   | <i>Lbp</i>     | <i>Lta</i>     |
| <i>Kcnk7</i>    | <i>Lcat</i>    | <i>Ltf</i>     |
| <i>Kcnma1</i>   | <i>Lcn4</i>    | <i>Ly6a</i>    |
| <i>Kcnmb1</i>   | <i>Lct</i>     | <i>Ly6c1</i>   |
| <i>Kcnrg</i>    | <i>Ldha</i>    | <i>Ly6c2</i>   |
| <i>Kcnu1</i>    | <i>Ldhc</i>    | <i>Ly6g5b</i>  |
| <i>Kctd14</i>   | <i>Ldhd</i>    | <i>Ly6i</i>    |
| <i>Kctd18</i>   | <i>Ldlrad1</i> | <i>Ly86</i>    |
| <i>Kctd4</i>    | <i>Ldlrad2</i> | <i>Lypd2</i>   |
| <i>Kdm4c</i>    | <i>Leap2</i>   | <i>Lyz2</i>    |
| <i>Kel</i>      | <i>Lefty1</i>  | <i>Lzts1</i>   |
| <i>Khdc1a</i>   | <i>Lenep</i>   | <i>Magix</i>   |
| <i>Kif7</i>     | <i>Lgals3</i>  | <i>Maml2</i>   |
| <i>Klb</i>      | <i>Lgals4</i>  | <i>Mamstr</i>  |



Map3k13  
Mapk10  
Mas1  
Masp2  
Matn1  
Mc1r  
Mc5r  
Mcoln3  
Mcpt8  
Mcts2  
Mdga1  
Mecom  
Mef2c  
Mest  
Mfi2  
Mfrp  
Mfsd2b  
Mgp  
Mgst1  
Mia2  
Mical3  
Micall2  
Mid1  
Mip  
Mmd  
Mmp12  
Mmp13  
Mmp19  
Mmp21  
Morc1  
Morc2b  
Morn3  
Mosc1  
Moxd2  
Mpeg1  
Mpp4  
Mpv17  
Mrc1  
Mrps24  
Mrvi1  
Ms4a15  
Ms4a4b  
Ms4a4d

Ms4a6c  
Ms4a6d  
Ms4a7  
Msh4  
Msln1  
Msmg  
Msra  
Mst1r  
Mthfs  
Mtmr7  
Mttp  
Muc13  
Muc5b  
Muc6  
Mustn1  
Mx2  
Myadm  
Mybpc3  
Mybphl  
Myh3  
Myh4  
Myh7b  
Myl10  
Myl6  
Myl9  
Mylk4  
Myo15  
Myo1a  
Myo1f  
Myo1h  
Myo3b  
Myoc  
Myocd  
Myom1  
Myoz1  
Myoz3  
Naa11  
Naalad2  
Naalad11  
Naip2  
Naip7  
Nanos3  
Nap115

Nbas  
Ncf1  
Ncf2  
Ncf4  
Nckap5  
Ndel1  
Ndst2  
Necab1  
Nedd8  
Neur13  
Nfam1  
Nfia  
Nfyc  
Ng23  
Ngp  
Nhedc1  
Nhej1  
Nhs11  
Nkg7  
Nlgn3  
Nlrc4  
Nlrc5  
Nlrp1a  
Nlrp1b  
Nmnat3  
Nmur1  
Nod2  
Nos3  
Nostrin  
Notch2  
Notch4  
Nox1  
Npb  
Npc111  
Npff  
Npm2  
Nppa  
Nqo1  
Nr1i2  
Nradd  
Nrap  
Nrip2  
Nrn11

Nsmce4a  
Nt5dc2  
Nudt15  
Nup210l  
Nxf2  
Nxn1  
Nynrin  
Nyx  
Oas1a  
Oas1e  
Oas2  
Oas3  
Oasl2  
Oaz3  
Odz4  
Ogn  
Ola1  
Olfml3  
Omd  
Omg  
Omp  
Opalin  
Oplah  
Opn1sw  
Opr1  
Orm1  
Orm2  
Orm3  
Osbpl10  
Osgin1  
Osta  
Otor  
Otos  
Otud6a  
Ovgp1  
P2rx1  
P2rx7  
P2ry12  
P2ry13  
P2ry14  
Pabpc1l  
Pabpc2  
Pabpc4

Pabpn1l  
Padi1  
Padi3  
Padi4  
Padi6  
Pald  
Palm3  
Panx3  
Papola  
Paqr5  
Park2  
Parp11  
Pate4  
Patl2  
Pcbd1  
Pcdha10  
Pcdhb16  
Pcdhb5  
Pcdhga11  
Pcdhga12  
Pcdhga2  
Pcdhga3  
Pcdhga8  
Pcdhga9  
Pcdhgc3  
Pcdhgc4  
Pcdhgc5  
Pcolce  
Pcp2  
Pcsk1  
Pcyt1b  
Pdcd1lg2  
Pde1a  
Pde1c  
Pde2a  
Pde4c  
Pde4d  
Pde6a  
Pde6b  
Pde6g  
Pdha2  
Pdzd3  
Pdzd9

Pdzk1  
Pear1  
Pef1  
Pgam2  
Pgf  
Pglyrp1  
Phactr1  
Phex  
Phf17  
Phf3  
Phldb2  
Phyhd1  
Phyhipl  
Pi16  
Pid1  
Pign  
Pik3cd  
Pip5kl1  
Pipox  
Pir  
Piwil2  
Pkhd1l1  
Pklr  
Pkmyt1  
Pkn2  
Pkp3  
Pla1a  
Pla2g10  
Pla2g3  
Pla2g4c  
Pla2g4f  
Plat  
Plcd4  
Plce1  
Pld4  
Pld6  
Plekha6  
Plekhb1  
Plekhg4  
Plekhn1  
Plin4  
Pln  
Plp1

|                 |                 |                |
|-----------------|-----------------|----------------|
| <i>Plxnb3</i>   | <i>Prss34</i>   | <i>Rarb</i>    |
| <i>Pmch</i>     | <i>Prss36</i>   | <i>Rb1cc1</i>  |
| <i>Pnma3</i>    | <i>Prss39</i>   | <i>Rbbp6</i>   |
| <i>Pnmt</i>     | <i>Prss52</i>   | <i>Rbm25</i>   |
| <i>Pnp2</i>     | <i>Prss53</i>   | <i>Rbm47</i>   |
| <i>Pnpla1</i>   | <i>Prss55</i>   | <i>Rbms2</i>   |
| <i>Pnrc1</i>    | <i>Prss8</i>    | <i>Rbpj</i>    |
| <i>Podn</i>     | <i>Prx</i>      | <i>Rcbtb2</i>  |
| <i>Podnl1</i>   | <i>Psap1</i>    | <i>Rdh1</i>    |
| <i>Pole4</i>    | <i>Psat1</i>    | <i>Rdh9</i>    |
| <i>Pomc</i>     | <i>Psen2</i>    | <i>Rec8</i>    |
| <i>Popdc2</i>   | <i>Psmas6</i>   | <i>Reep2</i>   |
| <i>Por</i>      | <i>Psmas8</i>   | <i>Rem2</i>    |
| <i>Pot1b</i>    | <i>Psors1c2</i> | <i>Renbp</i>   |
| <i>Pou1f1</i>   | <i>Ptgds</i>    | <i>Rfpl4</i>   |
| <i>Pou2af1</i>  | <i>Ptger1</i>   | <i>Rfx8</i>    |
| <i>Ppapdc3</i>  | <i>Ptges</i>    | <i>Rgs18</i>   |
| <i>Pparg</i>    | <i>Ptgir</i>    | <i>Rgs20</i>   |
| <i>Ppargc1a</i> | <i>Ptgs2</i>    | <i>Rgs3</i>    |
| <i>Ppef2</i>    | <i>Ptplad2</i>  | <i>Rgs8</i>    |
| <i>Ppfia4</i>   | <i>Ptprd</i>    | <i>Rgs9</i>    |
| <i>Ppp1r13b</i> | <i>Pvrl4</i>    | <i>Rhbdl1</i>  |
| <i>Ppp2r3a</i>  | <i>Pxt1</i>     | <i>Rhd</i>     |
| <i>Pram1</i>    | <i>Pycr1</i>    | <i>Rho</i>     |
| <i>Prelp</i>    | <i>Pygl</i>     | <i>Rhox2f</i>  |
| <i>Prf1</i>     | <i>Pygm</i>     | <i>Rin2</i>    |
| <i>Prg4</i>     | <i>Pyroxd2</i>  | <i>Ripply1</i> |
| <i>Prkag1</i>   | <i>Qprt</i>     | <i>Rlbp1</i>   |
| <i>Prl4a1</i>   | <i>Qrfp</i>     | <i>Rltpr</i>   |
| <i>Prm1</i>     | <i>Qrich2</i>   | <i>Rnase10</i> |
| <i>Prox2</i>    | <i>Qtrtd1</i>   | <i>Rnase6</i>  |
| <i>Proz</i>     | <i>R3hdm2</i>   | <i>Rnf11</i>   |
| <i>Prph2</i>    | <i>Rab25</i>    | <i>Rnf121</i>  |
| <i>Prpsap1</i>  | <i>Rab26</i>    | <i>Rnf123</i>  |
| <i>Prr13</i>    | <i>Rab27b</i>   | <i>Rnf125</i>  |
| <i>Prr14</i>    | <i>Rab36</i>    | <i>Rnf128</i>  |
| <i>Prr15l</i>   | <i>Rab3il1</i>  | <i>Rnf165</i>  |
| <i>Prr19</i>    | <i>Rab44</i>    | <i>Rnf169</i>  |
| <i>Prr5l</i>    | <i>Raet1b</i>   | <i>Rnf183</i>  |
| <i>Prrt3</i>    | <i>Raet1d</i>   | <i>Rnf4</i>    |
| <i>Prss2</i>    | <i>Ramp3</i>    | <i>Rnf43</i>   |
| <i>Prss27</i>   | <i>Rapgef5</i>  | <i>Rpgrip1</i> |
| <i>Prss33</i>   | <i>Rapsn</i>    | <i>Rph3al</i>  |

|                |                  |                 |
|----------------|------------------|-----------------|
| <i>Rpl39l</i>  | <i>Sec16b</i>    | <i>Slc16a7</i>  |
| <i>Rpl3l</i>   | <i>Selp</i>      | <i>Slc17a8</i>  |
| <i>Rpl41</i>   | <i>Sema3b</i>    | <i>Slc17a9</i>  |
| <i>Rps13</i>   | <i>Sema4a</i>    | <i>Slc22a1</i>  |
| <i>Rps6ka3</i> | <i>Sema4b</i>    | <i>Slc22a8</i>  |
| <i>Rps6ka6</i> | 40430            | <i>Slc23a1</i>  |
| <i>Rsad2</i>   | 40424            | <i>Slc23a3</i>  |
| <i>Rsph1</i>   | <i>Serpina1a</i> | <i>Slc24a5</i>  |
| <i>Rsph6a</i>  | <i>Serpina5</i>  | <i>Slc25a18</i> |
| <i>Rtp1</i>    | <i>Serpinc1</i>  | <i>Slc25a2</i>  |
| <i>Runx2</i>   | <i>Serpind1</i>  | <i>Slc25a34</i> |
| <i>Runx3</i>   | <i>Serpine1</i>  | <i>Slc25a41</i> |
| <i>Ruvbl2</i>  | <i>Serpinf1</i>  | <i>Slc25a47</i> |
| <i>Rxfp1</i>   | <i>Serpinf2</i>  | <i>Slc26a1</i>  |
| <i>Rxfp4</i>   | <i>Sestd1</i>    | <i>Slc27a5</i>  |
| <i>Ryr1</i>    | <i>Set</i>       | <i>Slc28a1</i>  |
| <i>S100a14</i> | <i>Sez6l2</i>    | <i>Slc28a2</i>  |
| <i>S100a3</i>  | <i>Sftpb</i>     | <i>Slc2a6</i>   |
| <i>S100a4</i>  | <i>Sgca</i>      | <i>Slc2a9</i>   |
| <i>S100a6</i>  | <i>Sgcg</i>      | <i>Slc31a2</i>  |
| <i>S100b</i>   | <i>Sgip1</i>     | <i>Slc36a3</i>  |
| <i>Sag</i>     | <i>Sh2d1b1</i>   | <i>Slc39a2</i>  |
| <i>Samd3</i>   | <i>Sh2d4b</i>    | <i>Slc39a4</i>  |
| <i>Samd4b</i>  | <i>Sh3d19</i>    | <i>Slc39a5</i>  |
| <i>Samsn1</i>  | <i>Sh3rf2</i>    | <i>Slc3a1</i>   |
| <i>Sap25</i>   | <i>Sh3tc1</i>    | <i>Slc44a3</i>  |
| <i>Sardh</i>   | <i>Siglec1</i>   | <i>Slc4a5</i>   |
| <i>Sarnp</i>   | <i>Siglece</i>   | <i>Slc5a10</i>  |
| <i>Sbsn</i>    | <i>Siglecg</i>   | <i>Slc5a11</i>  |
| <i>Scd3</i>    | <i>Siglech</i>   | <i>Slc5a2</i>   |
| <i>Scd4</i>    | <i>Sin3a</i>     | <i>Slc5a9</i>   |
| <i>Scel</i>    | <i>Sipa1l2</i>   | <i>Slc6a18</i>  |
| <i>Scg3</i>    | <i>Sipa1l3</i>   | <i>Slc6a19</i>  |
| <i>Scgb1c1</i> | <i>Slc10a1</i>   | <i>Slc6a20b</i> |
| <i>Scgb3a1</i> | <i>Slc10a5</i>   | <i>Slc7a3</i>   |
| <i>Scn11a</i>  | <i>Slc12a3</i>   | <i>Slc7a7</i>   |
| <i>Scn2b</i>   | <i>Slc12a7</i>   | <i>Slc8a1</i>   |
| <i>Scn4a</i>   | <i>Slc12a8</i>   | <i>Slco2b1</i>  |
| <i>Scoc</i>    | <i>Slc13a4</i>   | <i>Slfn1</i>    |
| <i>Scp2</i>    | <i>Slc14a2</i>   | <i>Slfn4</i>    |
| <i>Scx</i>     | <i>Slc15a2</i>   | <i>Slfn1l</i>   |
| <i>Sdcbp2</i>  | <i>Slc15a3</i>   | <i>Slpi</i>     |
| <i>Sds</i>     | <i>Slc16a4</i>   | <i>Slurp1</i>   |

|                   |                 |                 |
|-------------------|-----------------|-----------------|
| <i>Smc1b</i>      | <i>Strada</i>   | <i>Tdrd7</i>    |
| <i>Snrpn</i>      | <i>Strc</i>     | <i>Tecta</i>    |
| <i>Snx13</i>      | <i>Stx19</i>    | <i>Teddm1</i>   |
| <i>Snx29</i>      | <i>Stx4a</i>    | <i>Tef</i>      |
| <i>Snx31</i>      | <i>Sult1a1</i>  | <i>Tekt2</i>    |
| <i>Soat2</i>      | <i>Sult2b1</i>  | <i>Tekt5</i>    |
| <i>Socs6</i>      | <i>Sult6b1</i>  | <i>Tex101</i>   |
| <i>Sorbs2</i>     | <i>Susd2</i>    | <i>Tff3</i>     |
| <i>Sox15</i>      | <i>Svopl</i>    | <i>Tfpi</i>     |
| <i>Sp2</i>        | <i>Syce1</i>    | <i>Tg</i>       |
| <i>Spaca4</i>     | <i>Syce1l</i>   | <i>Tgfb1i1</i>  |
| <i>Spag1</i>      | <i>Sycn</i>     | <i>Tgm1</i>     |
| <i>Sparc</i>      | <i>Sycp3</i>    | <i>Tgm3</i>     |
| <i>Spata21</i>    | <i>Synpo</i>    | <i>Tgm4</i>     |
| <i>Spata9</i>     | <i>Synpo2l</i>  | <i>Tgm6</i>     |
| <i>Spatc1</i>     | <i>Syt14</i>    | <i>Tgtp1</i>    |
| <i>Spem1</i>      | <i>Sytl2</i>    | <i>Tgtp2</i>    |
| <i>Spib</i>       | <i>Tacc2</i>    | <i>Thbs2</i>    |
| <i>Spink2</i>     | <i>Tacr2</i>    | <i>Thoc2</i>    |
| <i>Spink4</i>     | <i>Taf4b</i>    | <i>Tiam1</i>    |
| <i>Src</i>        | <i>Tagap</i>    | <i>Tiam2</i>    |
| <i>Srcrb4d</i>    | <i>Tagln</i>    | <i>Tigit</i>    |
| <i>Srgn</i>       | <i>Tagln3</i>   | <i>Timm8a2</i>  |
| <i>Sri</i>        | <i>Tank</i>     | <i>Timp1</i>    |
| <i>Srpk3</i>      | <i>Tas1r3</i>   | <i>Tktl1</i>    |
| <i>Srpx</i>       | <i>Tas2r143</i> | <i>Tln2</i>     |
| <i>Ssh3</i>       | <i>Tat</i>      | <i>Tlr13</i>    |
| <i>St18</i>       | <i>Tbata</i>    | <i>Tlr4</i>     |
| <i>St5</i>        | <i>Tbc1d1</i>   | <i>Tlr7</i>     |
| <i>St6galnac6</i> | <i>Tbc1d14</i>  | <i>Tlr9</i>     |
| <i>Stab2</i>      | <i>Tbcel</i>    | <i>Tm4sf20</i>  |
| <i>Stac3</i>      | <i>Tbx19</i>    | <i>Tm4sf5</i>   |
| <i>Stag1</i>      | <i>Tbx6</i>     | <i>Tm6sf2</i>   |
| <i>Stap2</i>      | <i>Tcam1</i>    | <i>Tmc1</i>     |
| <i>Star</i>       | <i>Tcap</i>     | <i>Tmc2</i>     |
| <i>Stard8</i>     | <i>Tceanc</i>   | <i>Tmc3</i>     |
| <i>Stc1</i>       | <i>Tcf20</i>    | <i>Tmc4</i>     |
| <i>Steap3</i>     | <i>Tcf23</i>    | <i>Tmed6</i>    |
| <i>Steap4</i>     | <i>Tcte1</i>    | <i>Tmem119</i>  |
| <i>Stoml3</i>     | <i>Tctex1d4</i> | <i>Tmem120b</i> |
| <i>Ston2</i>      | <i>Tctn2</i>    | <i>Tmem150b</i> |
| <i>Stox2</i>      | <i>Tdgf1</i>    | <i>Tmem173</i>  |
| <i>Stra8</i>      | <i>Tdo2</i>     | <i>Tmem184a</i> |

|                  |                |                |
|------------------|----------------|----------------|
| <i>Tmem204</i>   | <i>Trfr2</i>   | <i>Upb1</i>    |
| <i>Tmem219</i>   | <i>Trhr2</i>   | <i>Upk1a</i>   |
| <i>Tmem22</i>    | <i>Trim43a</i> | <i>Upk1b</i>   |
| <i>Tmem30c</i>   | <i>Trim43c</i> | <i>Upk3b</i>   |
| <i>Tmem45a</i>   | <i>Trim44</i>  | <i>Usp14</i>   |
| <i>Tmem52</i>    | <i>Trim47</i>  | <i>Usp31</i>   |
| <i>Tmem56</i>    | <i>Trim66</i>  | <i>Usp37</i>   |
| <i>Tmem63c</i>   | <i>Trim69</i>  | <i>Usp50</i>   |
| <i>Tmem81</i>    | <i>Trim72</i>  | <i>Usp54</i>   |
| <i>Tmem86b</i>   | <i>Trip6</i>   | <i>Usp7</i>    |
| <i>Tmem89</i>    | <i>Trpm1</i>   | <i>Utrn</i>    |
| <i>Tmem8c</i>    | <i>Trpv5</i>   | <i>Vasn</i>    |
| <i>Tmod4</i>     | <i>Trpv6</i>   | <i>Vcam1</i>   |
| <i>Tmprss3</i>   | <i>Tshb</i>    | <i>Vil1</i>    |
| <i>Tmprss4</i>   | <i>Tsks</i>    | <i>Vit</i>     |
| <i>Tmprss7</i>   | <i>Tspan1</i>  | <i>Vmn2r1</i>  |
| <i>Tmprss9</i>   | <i>Tspan10</i> | <i>Vmn2r84</i> |
| <i>Tmsb15b2</i>  | <i>Tspan7</i>  | <i>Vpreb2</i>  |
| <i>Tnfrsf13b</i> | <i>Tssk2</i>   | <i>Vpreb3</i>  |
| <i>Tnfrsf13c</i> | <i>Tssk4</i>   | <i>Vsig2</i>   |
| <i>Tnfrsf17</i>  | <i>Tssk5</i>   | <i>Vwa1</i>    |
| <i>Tnfrsf4</i>   | <i>Ttc30a2</i> | <i>Vwf</i>     |
| <i>Tnfsf4</i>    | <i>Ttc36</i>   | <i>Wbp2nl</i>  |
| <i>Tnfsf8</i>    | <i>Ttll10</i>  | <i>Wdr20b</i>  |
| <i>Tnip1</i>     | <i>Ttll3</i>   | <i>Wdr25</i>   |
| <i>Tnk1</i>      | <i>Ttn</i>     | <i>Wdr92</i>   |
| <i>Tnmd</i>      | <i>Tuba3a</i>  | <i>Wdtdc1</i>  |
| <i>Tnn</i>       | <i>Tuba3b</i>  | <i>Wfikkn2</i> |
| <i>Tnnc2</i>     | <i>Tubb3</i>   | <i>Wisp3</i>   |
| <i>Tnni1</i>     | <i>Tyrobp</i>  | <i>Wnt8b</i>   |
| <i>Tnnt1</i>     | <i>Ubash3b</i> | <i>Xcl1</i>    |
| <i>Tnnt3</i>     | <i>Ube2d2</i>  | <i>Xcr1</i>    |
| <i>Tnr</i>       | <i>Ube2f</i>   | <i>Xdh</i>     |
| <i>Tns1</i>      | <i>Ube2n</i>   | <i>Xiap</i>    |
| <i>Tns4</i>      | <i>Ubqln3</i>  | <i>Xirp1</i>   |
| <i>Tollip</i>    | <i>Ubr5</i>    | <i>Xlr</i>     |
| <i>Tom1</i>      | <i>Ubxn10</i>  | <i>Xlr3b</i>   |
| <i>Tpm3</i>      | <i>Uchl4</i>   | <i>Xlr3c</i>   |
| <i>Tpst1</i>     | <i>Ucma</i>    | <i>Xpnpep2</i> |
| <i>Tpte</i>      | <i>Ucn2</i>    | <i>Yipf7</i>   |
| <i>Trcg1</i>     | <i>Ucp3</i>    | <i>Ythdc2</i>  |
| <i>Trex2</i>     | <i>Ugt1a6b</i> | <i>Zan</i>     |
| <i>Trf</i>       | <i>Unc5cl</i>  | <i>Zbtb11</i>  |

Zbtb32  
Zbtb38  
Zcchc12  
Zcchc4  
Zcchc5  
Zdhhc1  
Zdhhc18  
Zfa  
Zfp111  
Zfp112  
Zfp217  
Zfp236  
Zfp366  
Zfp36l3  
Zfp385c  
Zfp395  
Zfp459  
Zfp516  
Zfp541  
Zfp575  
Zfp59  
Zfp654  
Zfp708  
Zfp709  
Zfp72  
Zfp750  
Zfp775  
Zfp799  
Zfp811  
Zfp819  
Zfp831  
Zfp870  
Zfp873  
Zfp879  
Zfp92  
Zg16  
Zkscan17  
Zmat1  
Zmynd10  
Zmynd17  
Zmynd8  
Zp1

**H3K4me3<sup>hi</sup>**  
**H3K27me3<sup>lo</sup>**

|               |               |               |
|---------------|---------------|---------------|
| 0610007C21Rik | 1110037F02Rik | 1700019B03Rik |
| 0610007L01Rik | 1110038D17Rik | 1700019G17Rik |
| 0610007P08Rik | 1110038F14Rik | 1700020L24Rik |
| 0610007P14Rik | 1110049F12Rik | 1700020O03Rik |
| 0610007P22Rik | 1110051M20Rik | 1700021C14Rik |
| 0610009B22Rik | 1110057K04Rik | 1700021F05Rik |
| 0610009D07Rik | 1110058L19Rik | 1700021K19Rik |
| 0610009O20Rik | 1110059E24Rik | 1700025E21Rik |
| 0610010F05Rik | 1110059G10Rik | 1700025G04Rik |
| 0610010K14Rik | 1190002H23Rik | 1700025K23Rik |
| 0610011F06Rik | 1190002N15Rik | 1700029F09Rik |
| 0610011L14Rik | 1190005F20Rik | 1700029G01Rik |
| 0610030E20Rik | 1190005I06Rik | 1700029J07Rik |
| 0610031J06Rik | 1190007I07Rik | 1700030J22Rik |
| 0610037L13Rik | 1200011I18Rik | 1700030K09Rik |
| 0610037P05Rik | 1200011M11Rik | 1700034F02Rik |
| 0910001L09Rik | 1200014J11Rik | 1700034H14Rik |
| 1110001A16Rik | 1200016B10Rik | 1700037C18Rik |
| 1110001J03Rik | 1300001I01Rik | 1700037H04Rik |
| 1110002B05Rik | 1300010F03Rik | 1700040I03Rik |
| 1110002N22Rik | 1300017J02Rik | 1700040L02Rik |
| 1110003E01Rik | 1300018I17Rik | 1700049G17Rik |
| 1110004E09Rik | 1500001M20Rik | 1700052N19Rik |
| 1110004F10Rik | 1500002O20Rik | 1700054N08Rik |
| 1110005A03Rik | 1500003O03Rik | 1700056E22Rik |
| 1110007C09Rik | 1500010J02Rik | 1700066B19Rik |
| 1110008F13Rik | 1500011H22Rik | 1700066M21Rik |
| 1110008J03Rik | 1500012F01Rik | 1700067K01Rik |
| 1110008L16Rik | 1500031L02Rik | 1700081L11Rik |
| 1110008P14Rik | 1500032L24Rik | 1700088E04Rik |
| 1110012L19Rik | 1520402A15Rik | 1700106N22Rik |
| 1110018G07Rik | 1600002H07Rik | 1700113I22Rik |
| 1110018J18Rik | 1600002K03Rik | 1700123O20Rik |
| 1110020G09Rik | 1600012F09Rik | 1810006K21Rik |
| 1110021J02Rik | 1600012H06Rik | 1810008A18Rik |
| 1110028C15Rik | 1600014C10Rik | 1810009A15Rik |
| 1110031I02Rik | 1600016N20Rik | 1810013D10Rik |
| 1110032A03Rik | 1600027N09Rik | 1810013L24Rik |
| 1110034A24Rik | 1700001O22Rik | 1810014F10Rik |
| 1110034G24Rik | 1700009P17Rik | 1810020D17Rik |
|               | 1700010I14Rik | 1810022K09Rik |
|               | 1700012A16Rik | 1810024B03Rik |
|               | 1700017B05Rik | 1810026J23Rik |



|               |               |               |
|---------------|---------------|---------------|
| 1810029B16Rik | 2310011J03Rik | 2510009E07Rik |
| 1810030N24Rik | 2310016M24Rik | 2510012J08Rik |
| 1810030O07Rik | 2310021P13Rik | 2510039O18Rik |
| 1810031K17Rik | 2310022A10Rik | 2610002D18Rik |
| 1810035L17Rik | 2310022B05Rik | 2610002I17Rik |
| 1810037I17Rik | 2310028H24Rik | 2610002J02Rik |
| 1810043G02Rik | 2310030N02Rik | 2610002M06Rik |
| 1810043H04Rik | 2310033P09Rik | 2610008E11Rik |
| 1810046J19Rik | 2310035C23Rik | 2610015P09Rik |
| 1810048J11Rik | 2310036O22Rik | 2610018G03Rik |
| 1810049H13Rik | 2310037I24Rik | 2610020H08Rik |
| 1810055G02Rik | 2310039H08Rik | 2610021K21Rik |
| 1810062G17Rik | 2310044G17Rik | 2610027L16Rik |
| 1810063B05Rik | 2310044H10Rik | 2610029G23Rik |
| 1810063B07Rik | 2310045N01Rik | 2610029I01Rik |
| 1810074P20Rik | 2310046O06Rik | 2610039C10Rik |
| 2010002N04Rik | 2310047B19Rik | 2610101N10Rik |
| 2010012O05Rik | 2310047M10Rik | 2610301B20Rik |
| 2010015L04Rik | 2310057M21Rik | 2610301G19Rik |
| 2010106G01Rik | 2310061C15Rik | 2610318N02Rik |
| 2010107E04Rik | 2310067B10Rik | 2610507B11Rik |
| 2010109A12Rik | 2310079F23Rik | 2610524H06Rik |
| 2010109K11Rik | 2400001E08Rik | 2610528E23Rik |
| 2010305A19Rik | 2400003C14Rik | 2700007P21Rik |
| 2010317E24Rik | 2410001C21Rik | 2700029M09Rik |
| 2010321M09Rik | 2410002F23Rik | 2700049A03Rik |
| 2200002D01Rik | 2410002I01Rik | 2700050L05Rik |
| 2210012G02Rik | 2410002O22Rik | 2700060E02Rik |
| 2210016F16Rik | 2410003K15Rik | 2700062C07Rik |
| 2210016L21Rik | 2410004B18Rik | 2700078E11Rik |
| 2210018M11Rik | 2410015M20Rik | 2700097O09Rik |
| 2210021J22Rik | 2410016O06Rik | 2810002N01Rik |
| 2210404O07Rik | 2410042D21Rik | 2810004N23Rik |
| 2210408I21Rik | 2410066E13Rik | 2810006K23Rik |
| 2310001A20Rik | 2410075B13Rik | 2810008M24Rik |
| 2310003C23Rik | 2410089E03Rik | 2810021B07Rik |
| 2310003H01Rik | 2410091C18Rik | 2810021J22Rik |
| 2310003L22Rik | 2410127L17Rik | 2810046L04Rik |
| 2310004I24Rik | 2410131K14Rik | 2810403A07Rik |
| 2310004N24Rik | 2500003M10Rik | 2810405K02Rik |
| 2310008H04Rik | 2510002D24Rik | 2810408A11Rik |
| 2310008H09Rik | 2510003E04Rik | 2810408M09Rik |
| 2310009B15Rik | 2510006D16Rik | 2810417H13Rik |

|               |               |               |
|---------------|---------------|---------------|
| 2810422J05Rik | 4930420K17Rik | 5033411D12Rik |
| 2810422O20Rik | 4930422G04Rik | 5033414D02Rik |
| 2810428I15Rik | 4930427A07Rik | 5133401N09Rik |
| 2810432D09Rik | 4930430F08Rik | 5430437P03Rik |
| 2810453I06Rik | 4930432K21Rik | 5730403B10Rik |
| 2810474O19Rik | 4930444A02Rik | 5730419I09Rik |
| 2900006K08Rik | 4930452B06Rik | 5730437N04Rik |
| 2900010M23Rik | 4930453N24Rik | 5730455O13Rik |
| 2900064A13Rik | 4930455C21Rik | 5730455P16Rik |
| 2900092E17Rik | 4930455F23Rik | 5730469M10Rik |
| 3010026O09Rik | 4930471M23Rik | 5730494M16Rik |
| 3110001D03Rik | 4930473A06Rik | 5730494N06Rik |
| 3110001I22Rik | 4930503L19Rik | 5730508B09Rik |
| 3110002H16Rik | 4930534B04Rik | 5730559C18Rik |
| 3110003A17Rik | 4930547N16Rik | 5730590G19Rik |
| 3110007F17Rik | 4930550C14Rik | 5830403L16Rik |
| 3110009E18Rik | 4930572J05Rik | 5830405N20Rik |
| 3110040N11Rik | 4930578N16Rik | 5830415F09Rik |
| 3110043O21Rik | 4930579G22Rik | 5830417I10Rik |
| 3110056O03Rik | 4930579G24Rik | 5830418K08Rik |
| 3110057O12Rik | 4930583H14Rik | 5830433M19Rik |
| 3110062M04Rik | 4930588N13Rik | 5930434B04Rik |
| 3110082I17Rik | 4931406C07Rik | 6030446N20Rik |
| 3300002I08Rik | 4931406P16Rik | 6030458C11Rik |
| 3830406C13Rik | 4931414P19Rik | 6230427J02Rik |
| 4632411B12Rik | 4931428F04Rik | 6330406I15Rik |
| 4632415K11Rik | 4932438A13Rik | 6330408A02Rik |
| 4632428N05Rik | 4933403F05Rik | 6330409N04Rik |
| 4632434I11Rik | 4933403G14Rik | 6330416G13Rik |
| 4732418C07Rik | 4933405L10Rik | 6330439K17Rik |
| 4732471D19Rik | 4933407C03Rik | 6330503K22Rik |
| 4831426I19Rik | 4933407H18Rik | 6330545A04Rik |
| 4833420G17Rik | 4933411K20Rik | 6330549D23Rik |
| 4833439L19Rik | 4933421E11Rik | 6330578E17Rik |
| 4833442J19Rik | 4933424B01Rik | 6430527G18Rik |
| 4921507P07Rik | 4933426M11Rik | 6430550D23Rik |
| 4921513D23Rik | 4933427D14Rik | 6430571L13Rik |
| 4921517L17Rik | 4933430I17Rik | 6430598A04Rik |
| 4921524J17Rik | 4933432B09Rik | 6430706D22Rik |
| 4922501C03Rik | 4933433P14Rik | 6530401N04Rik |
| 4922505G16Rik | 4933434E20Rik | 6530418L21Rik |
| 4930402H24Rik | 4933439F18Rik | 6720456B07Rik |
| 4930415O20Rik | 5031439G07Rik | 6720456H20Rik |

|               |          |        |
|---------------|----------|--------|
| 6720463M24Rik | Aacs     | Abi1   |
| 8030462N17Rik | Aagab    | Abi2   |
| 8430406I07Rik | Aak1     | Abi3   |
| 8430410A17Rik | Aamp     | Abl1   |
| 8430410K20Rik | Aars     | Abl2   |
| 8430419L09Rik | Aars2    | Abt1   |
| 9030624J02Rik | Aarsd1   | Abtb1  |
| 9030625A04Rik | Aasdh    | Abtb2  |
| 9130011E15Rik | Aasdhppt | Acaa1a |
| 9130011J15Rik | AB124611 | Acaa2  |
| 9130019O22Rik | Abca1    | Acaca  |
| 9130023H24Rik | Abca2    | Acad10 |
| 9130401M01Rik | Abca7    | Acad8  |
| 9230110C19Rik | Abcb1a   | Acad9  |
| 9430015G10Rik | Abcb1b   | Acadl  |
| 9430016H08Rik | Abcb4    | Acadm  |
| 9430023L20Rik | Abcb6    | Acads  |
| 9430038I01Rik | Abcb7    | Acadsb |
| 9530068E07Rik | Abcb8    | Acadvl |
| 9530077C05Rik | Abcb9    | Acap1  |
| 9630033F20Rik | Abcc1    | Acap2  |
| 9930012K11Rik | Abcc10   | Acap3  |
| a             | Abcc4    | Acat1  |
| A130022J15Rik | Abcc5    | Acat2  |
| A230046K03Rik | Abcd1    | Acbd3  |
| A230050P20Rik | Abcd3    | Acbd5  |
| A230051G13Rik | Abcd4    | Acbd6  |
| A2ld1         | Abce1    | Acbd7  |
| A430005L14Rik | Abcf1    | Accs   |
| A430033K04Rik | Abcf2    | Acd    |
| A430078G23Rik | Abcf3    | Acin1  |
| A530054K11Rik | Abcg1    | Acly   |
| A630007B06Rik | Abcg3    | Acn9   |
| A630033H20Rik | Abhd10   | Aco1   |
| A630055G03Rik | Abhd11   | Aco2   |
| A830007P12Rik | Abhd12   | Acot13 |
| A830010M20Rik | Abhd13   | Acot2  |
| A830093I24Rik | Abhd14a  | Acot5  |
| A930001N09Rik | Abhd14b  | Acot6  |
| AA415398      | Abhd15   | Acot7  |
| AA467197      | Abhd2    | Acot8  |
| AA960436      | Abhd4    | Acot9  |
| Aaas          | Abhd8    | Acox1  |

|          |         |          |
|----------|---------|----------|
| Acox3    | Adat2   | Agbl5    |
| Acp2     | Adat3   | Agfg1    |
| Acp5     | Adck1   | Agfg2    |
| Acp6     | Adck2   | Aggf1    |
| Acpl2    | Adck4   | Agk      |
| Acpp     | Adck5   | Agj      |
| Acsf2    | Adcy3   | Agpat1   |
| Acsf3    | Adcy6   | Agpat2   |
| Acsl1    | Add1    | Agpat3   |
| Acsl3    | Add3    | Agpat4   |
| Acsl4    | Adh5    | Agpat5   |
| Acsl5    | Adhfe1  | Agpat6   |
| Acss1    | Adi1    | Agphd1   |
| Acss2    | Adipor1 | Agps     |
| Actb     | Adk     | Agrn     |
| Actg1    | Adnp    | Agrp     |
| Actl6a   | Adnp2   | Agtpbp1  |
| Actn1    | Ado     | Agtrap   |
| Actn2    | Adora2a | Agxt2l2  |
| Actn3    | Adpgk   | Ahctf1   |
| Actn4    | Adprh   | Ahcy     |
| Actr10   | Adprhl2 | Ahcyl1   |
| Actr1a   | Adrb2   | Ahcyl2   |
| Actr2    | Adrbk1  | Ahdc1    |
| Actr3    | Adrm1   | Ahi1     |
| Actr5    | Adsl    | Ahr      |
| Actr6    | Adss    | Ahsa1    |
| Actr8    | Adssl1  | Ahsa2    |
| Acvr1b   | Aebp2   | AI314180 |
| Acy1     | Aen     | AI314976 |
| Acyp2    | Aes     | AI316807 |
| Ada      | Afap1   | AI413582 |
| Adal     | Aff1    | AI429214 |
| Adam10   | Aff3    | AI462493 |
| Adam12   | Aff4    | AI467606 |
| Adam17   | Afg3l1  | AI480653 |
| Adam9    | Afg3l2  | AI597468 |
| Adamts10 | Afmid   | AI597479 |
| Adamts3  | Aftph   | AI846148 |
| Adamts4  | Aga     | AI848100 |
| Adamts6  | Agap2   | AI987944 |
| Adar     | Agap3   | Aifm1    |
| Adat1    | Agbl3   | Aig1     |

|          |          |          |
|----------|----------|----------|
| Aimp1    | Alg2     | Angptl2  |
| Aimp2    | Alg3     | Angptl4  |
| Aip      | Alg5     | Angptl6  |
| Ak2      | Alg6     | Ankfy1   |
| Ak3      | Alg8     | Ankhd1   |
| Akap1    | Alg9     | Ankib1   |
| Akap10   | Alkbh1   | Ankle1   |
| Akap11   | Alkbh2   | Ankle2   |
| Akap12   | Alkbh3   | Ankmy2   |
| Akap13   | Alkbh4   | Ankra2   |
| Akap6    | Alkbh5   | Ankrd10  |
| Akap7    | Alkbh6   | Ankrd11  |
| Akap8    | Alkbh7   | Ankrd12  |
| Akap9    | Alkbh8   | Ankrd13a |
| Akirin1  | Alms1    | Ankrd13b |
| Akirin2  | Alpk1    | Ankrd13c |
| Akna     | Als2     | Ankrd13d |
| Akr1b10  | Als2cr4  | Ankrd16  |
| Akr1b3   | Amac1    | Ankrd17  |
| Akr1e1   | Amacr    | Ankrd24  |
| Akr7a5   | Ambra1   | Ankrd26  |
| Akt1     | Amdhd1   | Ankrd28  |
| Akt1s1   | Amdhd2   | Ankrd29  |
| Akt2     | Amfr     | Ankrd32  |
| Akt3     | Ammecr1  | Ankrd35  |
| Aktip    | Ammecr1l | Ankrd37  |
| Alad     | Amn1     | Ankrd39  |
| Alas1    | Amot     | Ankrd40  |
| Aldh16a1 | Ampd2    | Ankrd44  |
| Aldh18a1 | Ampd3    | Ankrd46  |
| Aldh1b1  | Amz2     | Ankrd49  |
| Aldh2    | Anapc1   | Ankrd50  |
| Aldh3a2  | Anapc10  | Ankrd52  |
| Aldh4a1  | Anapc11  | Ankrd54  |
| Aldh6a1  | Anapc13  | Ankrd55  |
| Aldh7a1  | Anapc16  | Ankrd60  |
| Aldh9a1  | Anapc2   | Ankrd9   |
| Aldoa    | Anapc4   | Anks1    |
| Alg1     | Anapc5   | Anks3    |
| Alg10b   | Anapc7   | Anln     |
| Alg12    | Angel1   | Ano10    |
| Alg13    | Angpt1   | Ano6     |
| Alg14    | Angpt2   | Ano8     |

|         |           |          |
|---------|-----------|----------|
| Anp32a  | Aph1a     | Arhgap17 |
| Anp32b  | Aph1b     | Arhgap18 |
| Anp32e  | Aph1c     | Arhgap19 |
| Antxr2  | Api5      | Arhgap21 |
| Anubl1  | Apip      | Arhgap23 |
| Anxa11  | Apitd1    | Arhgap24 |
| Anxa2   | Ap1f      | Arhgap25 |
| Anxa4   | Apoa1bp   | Arhgap30 |
| Anxa5   | Apoa2     | Arhgap31 |
| Anxa6   | Apobec1   | Arhgap33 |
| Anxa7   | Apobec3   | Arhgap4  |
| Ap1ar   | Apoe      | Arhgap5  |
| Ap1b1   | Apool     | Arhgap9  |
| Ap1g1   | Appbp2    | Arhgdia  |
| Ap1g2   | Appl1     | Arhgdib  |
| Ap1m1   | Appl2     | Arhgef1  |
| Ap1s1   | Aprt      | Arhgef10 |
| Ap1s2   | Aptx      | Arhgef11 |
| Ap1s3   | Aqp11     | Arhgef2  |
| Ap2a1   | Araf      | Arhgef3  |
| Ap2a2   | Arap1     | Arhgef6  |
| Ap2b1   | Arap2     | Arid1a   |
| Ap2m1   | Arc       | Arid2    |
| Ap2s1   | Arcn1     | Arid3a   |
| Ap3b1   | Arf1      | Arid3b   |
| Ap3d1   | Arf2      | Arid4a   |
| Ap3m1   | Arf3      | Arid4b   |
| Ap3m2   | Arf4      | Arid5a   |
| Ap3s1   | Arf5      | Arid5b   |
| Ap3s2   | Arf6      | Arih1    |
| Ap4b1   | Arfgap1   | Arih2    |
| Ap4e1   | Arfgap2   | Arl1     |
| Ap4m1   | Arfgap3   | Arl10    |
| Ap4s1   | Arfgef1   | Arl15    |
| Apaf1   | Arfgef2   | Arl16    |
| Apba3   | Arfip2    | Arl2     |
| Apbb1ip | Arfrp1    | Arl2bp   |
| Apbb3   | Arglu1    | Arl3     |
| Apc     | Arhgap1   | Arl4a    |
| Apcdd1  | Arhgap10  | Arl4c    |
| Apeh    | Arhgap11a | Arl4d    |
| Apex1   | Arhgap12  | Arl5a    |
| Apex2   | Arhgap15  | Arl5b    |

|         |         |         |
|---------|---------|---------|
| Arl5c   | Arsk    | Atf7ip  |
| Arl6    | Art1    | Atg10   |
| Arl6ip1 | Art4    | Atg12   |
| Arl6ip4 | Art5    | Atg13   |
| Arl6ip5 | Arv1    | Atg14   |
| Arl6ip6 | As3mt   | Atg16l1 |
| Arl8a   | Asah1   | Atg16l2 |
| Arl8b   | Asah2   | Atg2a   |
| Armc1   | Asb1    | Atg2b   |
| Armc10  | Asb13   | Atg3    |
| Armc2   | Asb3    | Atg4a   |
| Armc3   | Asb6    | Atg4b   |
| Armc5   | Asb7    | Atg4c   |
| Armc6   | Ascc1   | Atg4d   |
| Armc7   | Ascc2   | Atg5    |
| Armc8   | Ascc3   | Atg7    |
| Armc9   | Asf1a   | Atg9a   |
| Armcx1  | Asf1b   | Atg9b   |
| Armcx2  | Asl     | Ath1    |
| Armcx3  | Asna1   | Atic    |
| Armcx5  | Asns    | Atl1    |
| Armcx6  | Asnsd1  | Atl2    |
| Arnt    | Asph    | Atl3    |
| Arntl   | Aspm    | Atm     |
| Arpc1a  | Aspscr1 | Atmin   |
| Arpc1b  | Asrgl1  | Atn1    |
| Arpc2   | Ass1    | Atox1   |
| Arpc3   | Aste1   | Atp10a  |
| Arpc4   | Astl    | Atp11b  |
| Arpc5   | Asxl1   | Atp13a1 |
| Arpc5l  | Asxl2   | Atp13a2 |
| Arpp19  | Atad1   | Atp13a3 |
| Arpp21  | Atad2   | Atp1a1  |
| Arrb1   | Atad3a  | Atp1b1  |
| Arrb2   | Atad5   | Atp1b3  |
| Arrdc1  | Atcay   | Atp2a2  |
| Arrdc2  | Ate1    | Atp2a3  |
| Arrdc3  | Atf1    | Atp2b1  |
| Arrdc4  | Atf2    | Atp2b4  |
| Arsa    | Atf4    | Atp5a1  |
| Arsb    | Atf5    | Atp5b   |
| Arsg    | Atf6b   | Atp5c1  |
| Arsi    | Atf7    | Atp5e   |

|          |               |          |
|----------|---------------|----------|
| Atp5f1   | Atxn1l        | B3gnt5   |
| Atp5g1   | Atxn2         | B3gnt8   |
| Atp5g3   | Atxn2l        | B3gntl1  |
| Atp5h    | Atxn3         | B4galnt1 |
| Atp5j    | Atxn7         | B4galt1  |
| Atp5j2   | Atxn7l1       | B4galt3  |
| Atp5k    | Atxn7l2       | B4galt4  |
| Atp5l    | Atxn7l3       | B4galt5  |
| Atp5o    | Atxn7l3b      | B4galt7  |
| Atp5s    | AU019823      | B9d1     |
| Atp5sl   | AU022252      | B9d2     |
| Atp6ap1  | AU040320      | Bach1    |
| Atp6ap2  | Auh           | Bach2    |
| Atp6v0a2 | Aup1          | Bad      |
| Atp6v0b  | Aurka         | Bag1     |
| Atp6v0c  | Aurkaip1      | Bag2     |
| Atp6v0d1 | Aurkb         | Bag4     |
| Atp6v0e  | Aven          | Bag5     |
| Atp6v1a  | Avl9          | Bahcc1   |
| Atp6v1b2 | Avpi1         | Baiap2   |
| Atp6v1c1 | AW146020      | Bak1     |
| Atp6v1d  | AW146154      | Banf1    |
| Atp6v1e1 | AW209491      | Banp     |
| Atp6v1f  | AW549877      | Bap1     |
| Atp6v1g1 | AW555464      | Bard1    |
| Atp6v1g2 | Axin1         | Basp1    |
| Atp6v1h  | Axin2         | Batf     |
| Atp7a    | AY074887      | Batf2    |
| Atp8a1   | Azi1          | Bax      |
| Atp8b2   | Azi2          | Baz1a    |
| Atp9a    | Azin1         | Baz1b    |
| Atp9b    | B230118H07Rik | Baz2a    |
| Atpaf1   | B230208H17Rik | Baz2b    |
| Atpaf2   | B230217C12Rik | Bbs1     |
| Atpbd4   | B230219D22Rik | Bbs10    |
| Atpif1   | B2m           | Bbs2     |
| Atr      | B3galnt2      | Bbs4     |
| Atrip    | B3galt4       | Bbs5     |
| Atrn     | B3galt6       | Bbs7     |
| Atrnl1   | B3galtl       | Bbs9     |
| Atrx     | B3gat3        | Bbx      |
| Atxn1    | B3gnt1        | BC002230 |
| Atxn10   | B3gnt2        | BC003266 |



|          |         |         |
|----------|---------|---------|
| BC003331 | Bcas2   | Bloc1s1 |
| BC004004 | Bcas3   | Bloc1s3 |
| BC005537 | Bcat1   | Blvra   |
| BC005624 | Bcat2   | Blzf1   |
| BC006779 | Bccip   | Bmf     |
| BC013529 | Bcdin3d | Bmi1    |
| BC013712 | Bckdha  | Bmp2k   |
| BC016423 | Bckdk   | Bmp7    |
| BC016495 | Bcl10   | Bms1    |
| BC017158 | Bcl11b  | Bmyc    |
| BC017643 | Bcl2    | Bnip1   |
| BC017647 | Bcl2l1  | Bnip2   |
| BC023829 | Bcl2l12 | Bnip3   |
| BC024479 | Bcl2l13 | Bnip3l  |
| BC026590 | Bcl2l2  | Bod1    |
| BC027231 | Bcl6    | Bod1l   |
| BC028528 | Bcl7a   | Bola1   |
| BC029214 | Bcl7b   | Bola2   |
| BC030307 | Bcl7c   | Bola3   |
| BC030336 | Bcl9    | Boll    |
| BC030867 | Bclaf1  | Bop1    |
| BC031181 | Bcs1l   | Bpgm    |
| BC031353 | Becn1   | Bphl    |
| BC031781 | Begain  | Bpnt1   |
| BC037034 | Bend3   | Braf    |
| BC046331 | Bend5   | Brap    |
| BC046404 | Bet1    | Brca1   |
| BC048355 | Bet1l   | Brca2   |
| BC048403 | Bex2    | Brcc3   |
| BC048609 | Bex6    | Brd1    |
| BC049715 | Bfar    | Brd2    |
| BC049762 | Bhlhb9  | Brd4    |
| BC051628 | Bicd2   | Brd7    |
| BC052040 | Bid     | Brd8    |
| BC053749 | Bin3    | Brd9    |
| BC055324 | Birc2   | Bre     |
| BC056474 | Birc3   | Brf1    |
| BC057022 | Birc5   | Brf2    |
| BC057079 | Birc6   | Bri3bp  |
| BC067068 | Bivm    | Brip1   |
| BC088983 | Blcap   | Brix1   |
| Bcap29   | Blm     | Brms1   |
| Bcap31   | Blmh    | Brms1l  |

|               |               |         |
|---------------|---------------|---------|
| Brp44         | C1d           | Camk4   |
| Brp44l        | C1galt1       | Camkk1  |
| Brpf1         | C1galt1c1     | Camkk2  |
| Brpf3         | C1qbp         | Camkv   |
| Brwd1         | C2            | Caml    |
| Brwd3         | C230052I12Rik | Camsap1 |
| Bscl2         | C230081A13Rik | Camta1  |
| Bsdc1         | C230096C10Rik | Camta2  |
| Bsg           | C2cd2         | Cand1   |
| Bspry         | C2cd2l        | Cand2   |
| Bst2          | C2cd3         | Cant1   |
| Btaf1         | C330006K01Rik | Canx    |
| Btbd1         | C330007P06Rik | Cap1    |
| Btbd10        | C330018D20Rik | Cap2    |
| Btbd2         | C330019G07Rik | Capn1   |
| Btbd6         | C330027C09Rik | Capn10  |
| Btbd7         | C430048L16Rik | Capn2   |
| Btbd9         | C630004H02Rik | Capn5   |
| Btc           | C78339        | Capn7   |
| Btd           | C80913        | Capns1  |
| Btf3          | C87436        | Caprin1 |
| Btf3l4        | C8g           | Caprin2 |
| Btg1          | Cab39         | Capza1  |
| Btg2          | Cab39l        | Capza2  |
| Btg3          | Cabin1        | Capzb   |
| Btk           | Cables2       | Car12   |
| Btn1a1        | Cabyr         | Car13   |
| Btrc          | Cacnb1        | Car5a   |
| Bub1          | Cacybp        | Car7    |
| Bub1b         | Cad           | Car9    |
| Bub3          | Cage1         | Card11  |
| Bud13         | Calcoco1      | Carf    |
| Bud31         | Calcr1        | Carhsp1 |
| Bysl          | Calhm2        | Carkd   |
| Bzw1          | Calm1         | Carm1   |
| Bzw2          | Calm2         | Carns1  |
| C030006K11Rik | Calm3         | Cars    |
| C030039L03Rik | Calr          | Cars2   |
| C030046E11Rik | Calr3         | Casc1   |
| C030046I01Rik | Calu          | Casc4   |
| C030048B08Rik | Camk1d        | Casc5   |
| C130022K22Rik | Camk2d        | Casd1   |
| C130039O16Rik | Camk2g        | Caskin2 |

|          |         |         |
|----------|---------|---------|
| Casp2    | Ccdc123 | Ccdc57  |
| Casp3    | Ccdc124 | Ccdc58  |
| Casp6    | Ccdc125 | Ccdc59  |
| Casp7    | Ccdc126 | Ccdc6   |
| Casp8    | Ccdc127 | Ccdc61  |
| Casp8ap2 | Ccdc130 | Ccdc64  |
| Casp9    | Ccdc132 | Ccdc66  |
| Cast     | Ccdc134 | Ccdc69  |
| Cat      | Ccdc137 | Ccdc71  |
| Catsper2 | Ccdc138 | Ccdc74a |
| Cbfa2t2  | Ccdc14  | Ccdc75  |
| Cbfa2t3  | Ccdc141 | Ccdc77  |
| Cbfb     | Ccdc142 | Ccdc79  |
| Cbl      | Ccdc15  | Ccdc84  |
| Cblb     | Ccdc150 | Ccdc86  |
| Cbl1     | Ccdc151 | Ccdc88a |
| Cbr1     | Ccdc153 | Ccdc88b |
| Cbr4     | Ccdc155 | Ccdc88c |
| Cbwd1    | Ccdc157 | Ccdc9   |
| Cbx1     | Ccdc158 | Ccdc90a |
| Cbx3     | Ccdc163 | Ccdc90b |
| Cbx5     | Ccdc17  | Ccdc91  |
| Cbx6     | Ccdc18  | Ccdc92  |
| Cby1     | Ccdc21  | Ccdc93  |
| Cc2d1a   | Ccdc22  | Ccdc94  |
| Cc2d1b   | Ccdc23  | Ccdc96  |
| Ccar1    | Ccdc25  | Ccdc97  |
| Ccbl1    | Ccdc28a | Ccdc99  |
| Ccbl2    | Ccdc28b | Cchcr1  |
| Ccdc101  | Ccdc30  | Ccl25   |
| Ccdc103  | Ccdc32  | Ccl27a  |
| Ccdc104  | Ccdc34  | Ccm2    |
| Ccdc107  | Ccdc38  | Ccna2   |
| Ccdc109a | Ccdc39  | Ccnb1   |
| Ccdc109b | Ccdc41  | Ccnb2   |
| Ccdc111  | Ccdc43  | Ccnc    |
| Ccdc114  | Ccdc45  | Ccnd3   |
| Ccdc115  | Ccdc47  | Ccndbp1 |
| Ccdc116  | Ccdc50  | Ccne1   |
| Ccdc117  | Ccdc51  | Ccne2   |
| Ccdc12   | Ccdc53  | Ccnf    |
| Ccdc120  | Ccdc55  | Ccng1   |
| Ccdc122  | Ccdc56  | Ccng2   |

|         |          |            |
|---------|----------|------------|
| Ccnh    | Cd48     | Cdca3      |
| Ccni    | Cd5      | Cdca4      |
| Ccnj    | Cd52     | Cdca5      |
| Ccnjl   | Cd59b    | Cdca7      |
| Ccnk    | Cd6      | Cdca8      |
| Ccnl1   | Cd69     | Cdh24      |
| Ccnl2   | Cd79b    | Cdipt      |
| Ccnt1   | Cd81     | Cdk1       |
| Ccnt2   | Cd82     | Cdk10      |
| Ccny    | Cd84     | Cdk11b     |
| Ccnyl1  | Cd8a     | Cdk12      |
| Ccpg1   | Cd8b1    | Cdk13      |
| Ccr4    | Cd96     | Cdk16      |
| Ccr7    | Cd97     | Cdk17      |
| Ccr9    | Cd99l2   | Cdk19      |
| Ccrn4l  | Cdadcl   | Cdk2       |
| Ccs     | Cdan1    | Cdk20      |
| Cct2    | Cdc123   | Cdk2ap1    |
| Cct3    | Cdc14a   | Cdk2ap2    |
| Cct4    | Cdc16    | Cdk4       |
| Cct5    | Cdc20    | Cdk5       |
| Cct6a   | Cdc23    | Cdk5r1     |
| Cct6b   | Cdc25a   | Cdk5rap1   |
| Cct7    | Cdc25b   | Cdk5rap2   |
| Cct8    | Cdc25c   | Cdk5rap3   |
| Cd164   | Cdc26    | Cdk6       |
| Cd1d1   | Cdc27    | Cdk7       |
| Cd1d2   | Cdc34    | Cdk8       |
| Cd2     | Cdc37    | Cdk9       |
| Cd200r1 | Cdc37l1  | Cdka1      |
| Cd247   | Cdc42    | Cdkl1      |
| Cd24a   | Cdc42bpg | Cdkl2      |
| Cd27    | Cdc42ep2 | Cdkl3      |
| Cd274   | Cdc42ep3 | Cdkl4      |
| Cd2ap   | Cdc42ep4 | Cdkl5      |
| Cd2bp2  | Cdc42se1 | Cdkn1b     |
| Cd320   | Cdc42se2 | Cdkn2aip   |
| Cd37    | Cdc45    | Cdkn2aipnl |
| Cd3d    | Cdc5l    | Cdkn2c     |
| Cd3e    | Cdc6     | Cdkn2d     |
| Cd3g    | Cdc7     | Cdkn3      |
| Cd46    | Cdc73    | Cdnf       |
| Cd47    | Cdca2    | Cdon       |

|        |         |         |
|--------|---------|---------|
| Cdr2   | Cep72   | Chmp1a  |
| Cds2   | Cep76   | Chmp1b  |
| Cdt1   | Cep78   | Chmp2a  |
| Cdv3   | Cep97   | Chmp2b  |
| Cdyl2  | Cept1   | Chmp5   |
| Cebpb  | Cercam  | Chmp6   |
| Cebpg  | Cerk    | Chmp7   |
| Cebpz  | Cetn2   | Chordc1 |
| Cecr5  | Cetn3   | Chpf2   |
| Celf1  | Cetn4   | Chpt1   |
| Celsr1 | Cfdp1   | Chrac1  |
| Celsr2 | Cfl1    | Chrna9  |
| Cenpa  | Cfl2    | Chrbn1  |
| Cenpb  | Cflar   | Chst10  |
| Cenpc1 | Cggbp1  | Chst11  |
| Cenpe  | Cgrrf1  | Chst12  |
| Cenpf  | Chac2   | Chst14  |
| Cenph  | Chaf1a  | Chst15  |
| Cenpi  | Chaf1b  | Chsy1   |
| Cenpj  | Chchd1  | Chtf18  |
| Cenpk  | Chchd10 | Chuk    |
| Cenpl  | Chchd2  | Churc1  |
| Cenpm  | Chchd3  | Ciao1   |
| Cenpn  | Chchd4  | Ciapi1  |
| Cenpo  | Chchd5  | Cib1    |
| Cenpp  | Chchd6  | Cib2    |
| Cenpq  | Chchd8  | Cic     |
| Cenpt  | Chd1    | Cinp    |
| Cenpw  | Chd11   | Cir1    |
| Cep110 | Chd3    | Cirbp   |
| Cep120 | Chd4    | Cirh1a  |
| Cep135 | Chd6    | Cisd1   |
| Cep152 | Chd9    | Cisd2   |
| Cep164 | Chdh    | Cisd3   |
| Cep170 | Chek1   | Cit     |
| Cep250 | Chek2   | Cited2  |
| Cep290 | Cherp   | Ckap2   |
| Cep350 | Chfr    | Ckap2l  |
| Cep55  | Chic2   | Ckap5   |
| Cep57  | Chid1   | Cklf    |
| Cep63  | Chka    | Cks1b   |
| Cep68  | Chkb    | Cks2    |
| Cep70  | Chm     | Clasp1  |

|         |          |         |
|---------|----------|---------|
| Clasp2  | Cmpk2    | Commd1  |
| Clcc1   | Cmtm3    | Commd10 |
| Clcn2   | Cmtm4    | Commd2  |
| Clcn3   | Cmtm6    | Commd3  |
| Clcn4-2 | Cnbp     | Commd4  |
| Clcn5   | Cndp2    | Commd5  |
| Clcn6   | Cnih     | Commd6  |
| Clcn7   | Cnih4    | Commd7  |
| Cldn12  | Cnksr3   | Commd8  |
| Cldn4   | Cnn2     | Commd9  |
| Cldnd2  | Cnn3     | Comtd1  |
| Clec16a | Cnnm3    | Copa    |
| Clec2d  | Cnnm4    | Copb1   |
| Clec2i  | Cno      | Copb2   |
| Clic1   | Cnot1    | Cope    |
| Clic4   | Cnot10   | Copg    |
| Clic5   | Cnot2    | Copg2   |
| Clint1  | Cnot3    | Cops2   |
| Clip1   | Cnot4    | Cops3   |
| Clip2   | Cnot6    | Cops4   |
| Clk1    | Cnot6l   | Cops5   |
| Clk2    | Cnot8    | Cops6   |
| Clk3    | Cnp      | Cops7a  |
| Clk4    | Cnpy2    | Cops7b  |
| Cln3    | Cnpy3    | Cops8   |
| Cln5    | Cnpy4    | Copz1   |
| Cln6    | Cnr2     | Coq10a  |
| Clns1a  | Cnrip1   | Coq10b  |
| Clp1    | Cnst     | Coq2    |
| Clpb    | Cntd1    | Coq3    |
| Clpp    | Cntf     | Coq4    |
| Clptm1  | Cntln    | Coq5    |
| Clptm1l | Cntrob   | Coq6    |
| Clpx    | Cobra1   | Coq7    |
| Clspn   | Cog1     | Coq9    |
| Cltb    | Cog2     | Coro1a  |
| Cltc    | Cog3     | Coro1b  |
| Clybl   | Cog4     | Coro1c  |
| Cmah    | Cog5     | Coro2b  |
| Cmas    | Cog6     | Coro7   |
| Cmc1    | Cog7     | Cotl1   |
| Cml1    | Cog8     | Cox10   |
| Cmpk1   | Col4a3bp | Cox11   |

|         |            |          |
|---------|------------|----------|
| Cox15   | Creb3l2    | Csnk2b   |
| Cox16   | Crebbp     | Cspp1    |
| Cox17   | Crebl2     | Csrnp1   |
| Cox18   | Crebzf     | Csrnp2   |
| Cox19   | Creg1      | Csrp2bp  |
| Cox4i1  | Creld1     | Cst3     |
| Cox4nb  | Creld2     | Cstad    |
| Cox5a   | Crem       | Cstb     |
| Cox5b   | Crip1      | Cstf1    |
| Cox6a1  | Crip2      | Cstf2    |
| Cox6b1  | Cript      | Cstf2t   |
| Cox6b2  | Crk        | Cstf3    |
| Cox6c   | Crkl       | Ctage5   |
| Cox7a2  | Crif2      | Ctbp1    |
| Cox7a2l | Crif3      | Ctbs     |
| Cox7b   | Crls1      | Ctcf     |
| Cox7c   | Crnl1      | Ctdp1    |
| Cox8a   | Crocc      | Ctdsp1   |
| Cpeb2   | Crot       | Ctdsp2   |
| Cpeb3   | Crtap      | Ctdspl   |
| Cpeb4   | Crtc1      | Ctdspl2  |
| Cpne1   | Crtc2      | Ctnnal1  |
| Cpne3   | Crtc3      | Ctnnbip1 |
| Cpox    | Cry1       | Ctnnb1   |
| Cpped1  | Cry2       | Ctns     |
| Cpsf1   | Cryl1      | Ctps     |
| Cpsf2   | Cryz       | Ctps2    |
| Cpsf3   | Cs         | Ctr9     |
| Cpsf3l  | Csda       | Ctsa     |
| Cpsf4   | Csde1      | Ctsb     |
| Cpsf6   | Cse1l      | Ctsc     |
| Cpsf7   | Csf2ra     | Ctsd     |
| Cpt1a   | Csgalnact1 | Ctse     |
| Cpt2    | Csgalnact2 | Ctsl     |
| Cr1l    | Csk        | Ctso     |
| Cradd   | Csnk1a1    | Ctsz     |
| Cramp1l | Csnk1d     | Cttn     |
| Crat    | Csnk1e     | Ctu1     |
| Crb3    | Csnk1g1    | Ctu2     |
| Crbn    | Csnk1g2    | Ctxn1    |
| Crcp    | Csnk1g3    | Cuedc1   |
| Creb1   | Csnk2a1    | Cuedc2   |
| Creb3   | Csnk2a2    | Cul1     |

|          |               |               |
|----------|---------------|---------------|
| Cul2     | Cyp2u1        | D6Wsu116e     |
| Cul3     | Cyp39a1       | D6Wsu163e     |
| Cul4a    | Cyp4f13       | D730040F13Rik |
| Cul5     | Cyp4v3        | D8Erttd738e   |
| Cul7     | Cyp51         | D8Erttd82e    |
| Cul9     | Cysltr2       | D930014E17Rik |
| Cuta     | Cyth1         | D930015E06Rik |
| Cutc     | Cyth2         | D9Erttd402e   |
| Cux1     | Cyth3         | Dach2         |
| Cwc15    | D030016E14Rik | Dact3         |
| Cwc22    | D030056L22Rik | Dad1          |
| Cwc25    | D10Bwg1379e   | Dag1          |
| Cwc27    | D10Jhu81e     | Daglb         |
| Cwf19I1  | D10Wsu102e    | Dak           |
| Cwf19I2  | D10Wsu52e     | Dalrd3        |
| Cxcr4    | D11Wsu47e     | Dand5         |
| Cxx1a    | D11Wsu99e     | Dap           |
| Cxx1b    | D130040H23Rik | Dap3          |
| Cxx1c    | D14Abb1e      | Dapk1         |
| Cxxc1    | D15Erttd621e  | Dapk3         |
| Cxxc5    | D16Erttd472e  | Dapp1         |
| Cyb5     | D17H6S53E     | Dars          |
| Cyb561d1 | D17Wsu104e    | Dars2         |
| Cyb561d2 | D17Wsu92e     | Daxx          |
| Cyb5b    | D18Erttd653e  | Dazap1        |
| Cyb5d1   | D19Bwg1357e   | Dazap2        |
| Cyb5d2   | D19Erttd386e  | Dazl          |
| Cyb5r1   | D19Erttd737e  | Dbf4          |
| Cyb5r3   | D19Wsu162e    | Dbi           |
| Cyb5r4   | D1Bwg0212e    | Dbnl          |
| Cyb5rl   | D1Erttd622e   | Dbp           |
| Cyba     | D230025D16Rik | Dbr1          |
| Cybas3   | D230037D09Rik | Dbt           |
| Cybrd1   | D2Erttd750e   | Dcaf10        |
| Cyc1     | D2hgdh        | Dcaf11        |
| Cycs     | D2Wsu81e      | Dcaf12        |
| Cyfp2    | D330012F22Rik | Dcaf13        |
| Cyhr1    | D330028D13Rik | Dcaf15        |
| Cyld     | D3Erttd751e   | Dcaf17        |
| Cyp20a1  | D430042O09Rik | Dcaf5         |
| Cyp2d22  | D4Erttd22e    | Dcaf6         |
| Cyp2j9   | D4Wsu53e      | Dcaf7         |
| Cyp2r1   | D5Erttd579e   | Dcaf8         |



|         |         |         |
|---------|---------|---------|
| Dcakd   | Ddx26b  | Depdc1b |
| Dck     | Ddx27   | Depdc5  |
| Dclk2   | Ddx28   | Dera    |
| Dclre1a | Ddx31   | Derl1   |
| Dclre1b | Ddx39   | Derl2   |
| Dclre1c | Ddx3x   | Derl3   |
| Dcp1a   | Ddx41   | Det1    |
| Dcp1b   | Ddx42   | Dexi    |
| Dcp2    | Ddx46   | Dffa    |
| Dcps    | Ddx47   | Dffb    |
| Dctd    | Ddx49   | Dfna5   |
| Dctn1   | Ddx5    | Dfnb59  |
| Dctn2   | Ddx50   | Dgat1   |
| Dctn4   | Ddx51   | Dgat2   |
| Dctn5   | Ddx52   | Dgcr2   |
| Dctn6   | Ddx54   | Dgcr8   |
| Dctpp1  | Ddx55   | Dgka    |
| Dcun1d2 | Ddx56   | Dgke    |
| Dcun1d3 | Ddx58   | Dgkg    |
| Dcun1d5 | Ddx59   | Dgkq    |
| Dda1    | Ddx6    | Dguok   |
| Ddah2   | Ddx60   | Dhcr24  |
| Ddb1    | Deaf1   | Dhcr7   |
| Ddb2    | Deb1    | Dhdds   |
| Ddhd1   | Decr1   | Dhdh    |
| Ddhd2   | Decr2   | Dhfr    |
| Ddi2    | Dedd    | Dhodh   |
| Ddit3   | Dedd2   | Dhps    |
| Ddit4   | Def6    | Dhrs1   |
| Ddost   | Def8    | Dhrs11  |
| Ddrgk1  | Degs1   | Dhrs13  |
| Ddt     | Degs2   | Dhrs3   |
| Ddx1    | Dek     | Dhrs4   |
| Ddx10   | Dem1    | Dhrs7   |
| Ddx11   | Dennd1a | Dhrs7b  |
| Ddx17   | Dennd1b | Dhtkd1  |
| Ddx18   | Dennd1c | Dhx15   |
| Ddx19a  | Dennd2d | Dhx16   |
| Ddx19b  | Dennd3  | Dhx29   |
| Ddx20   | Dennd4b | Dhx30   |
| Ddx21   | Dennd4c | Dhx33   |
| Ddx23   | Denr    | Dhx34   |
| Ddx24   | Depdc1a | Dhx35   |

|         |          |         |
|---------|----------|---------|
| Dhx36   | Dnajb3   | Dock11  |
| Dhx37   | Dnajb4   | Dock2   |
| Dhx38   | Dnajb5   | Dock5   |
| Dhx40   | Dnajb6   | Dock6   |
| Dhx57   | Dnajb9   | Dohh    |
| Dhx58   | Dnajc1   | Dok1    |
| Dhx8    | Dnajc10  | Dok2    |
| Dhx9    | Dnajc11  | Dolk    |
| Diablo  | Dnajc12  | Dolpp1  |
| Diap1   | Dnajc14  | Dom3z   |
| Diap2   | Dnajc15  | Donson  |
| Diap3   | Dnajc16  | Dopey1  |
| Dicer1  | Dnajc17  | Dopey2  |
| Dido1   | Dnajc18  | Dot1l   |
| Dimt1   | Dnajc19  | Dpagt1  |
| Dip2a   | Dnajc2   | Dpcd    |
| Dip2b   | Dnajc21  | Dpf2    |
| Dip2c   | Dnajc24  | Dph1    |
| Dirc2   | Dnajc27  | Dph2    |
| Dis3    | Dnajc28  | Dph3    |
| Dis3l1  | Dnajc3   | Dph5    |
| Dis3l2  | Dnajc30  | Dpm1    |
| Dkc1    | Dnajc4   | Dpm2    |
| Dlat    | Dnajc5   | Dpp3    |
| Dld     | Dnajc7   | Dpp4    |
| Dleu7   | Dnajc8   | Dpp7    |
| Dlg1    | Dnajc9   | Dpp8    |
| Dlg4    | Dnalc1   | Dpp9    |
| Dlgap5  | Dnali1   | Dpy19l3 |
| Dlst    | Dnase1l1 | Dpy19l4 |
| Dmap1   | Dnase2a  | Dpy30   |
| Dmtf1   | Dnlz     | Dpysl2  |
| Dmxl1   | Dnm1l    | Dqx1    |
| Dna2    | Dnm2     | Dr1     |
| Dnahc2  | Dnmt1    | Dram1   |
| Dnahc8  | Dnmt3a   | Dram2   |
| Dnaja1  | Dnmt3b   | Drap1   |
| Dnaja2  | Dnpep    | Drg1    |
| Dnajb1  | Dntt     | Drg2    |
| Dnajb11 | Dnttip1  | Dscc1   |
| Dnajb12 | Dnttip2  | Dscr3   |
| Dnajb14 | Doc2g    | Dsel    |
| Dnajb2  | Dock10   | Dsn1    |

|          |               |         |
|----------|---------------|---------|
| Dstyk    | Dyrk1a        | Edem2   |
| Dtd1     | Dyrk1b        | Edem3   |
| Dtl      | Dyrk2         | Edf1    |
| Dtnb     | Dyrk3         | Eea1    |
| Dtnbp1   | Dyx1c1        | Eed     |
| Dtwd1    | Dzip1         | Eef1a1  |
| Dtwd2    | Dzip3         | Eef1b2  |
| Dtx1     | E130303B06Rik | Eef1d   |
| Dtx2     | E130306D19Rik | Eef1e1  |
| Dtx3     | E130308A19Rik | Eef1g   |
| Dtx3l    | E130309D02Rik | Eef2    |
| Dtymk    | E130311K13Rik | Eef2k   |
| Dus1l    | E2f1          | Eefsec  |
| Dus3l    | E2f2          | Eepd1   |
| Dus4l    | E2f3          | Efcab2  |
| Dusp1    | E2f4          | Efcab9  |
| Dusp11   | E2f5          | Efha1   |
| Dusp12   | E2f6          | Efha2   |
| Dusp16   | E2f7          | Efhc1   |
| Dusp19   | E2f8          | Efhd2   |
| Dusp2    | E330009J07Rik | Efna4   |
| Dusp22   | E430025E21Rik | Efr3a   |
| Dusp23   | E4f1          | Eftud1  |
| Dusp28   | Eaf1          | Eftud2  |
| Dusp4    | Eaf2          | Egln1   |
| Dusp5    | Eapp          | Egln2   |
| Dusp6    | Ears2         | Egln3   |
| Dusp7    | Ebag9         | Egr1    |
| Dut      | Ebna1bp2      | Ehbp111 |
| Dvl1     | Ebp           | Ehd1    |
| Dvl2     | Ebpl          | Ehd3    |
| Dvl3     | Ecd           | Ehd4    |
| Dym      | Ece1          | Ehhadh  |
| Dync1h1  | Ece2          | Ehmt1   |
| Dync1i2  | Ech1          | Ehmt2   |
| Dync1li1 | Echdc1        | Ei24    |
| Dync1li2 | Echs1         | Eid1    |
| Dync2h1  | Ecsit         | Eif1    |
| Dync2li1 | Ect2          | Eif1a   |
| Dynll1   | Edaradd       | Eif1ad  |
| Dynlrb1  | Edc3          | Eif1ax  |
| Dynlrb2  | Edc4          | Eif1b   |
| Dynlt3   | Edem1         | Eif2a   |

|           |         |          |
|-----------|---------|----------|
| Eif2ak1   | Eif6    | Enoph1   |
| Eif2ak2   | Elac1   | Enox2    |
| Eif2ak3   | Elac2   | Enpp4    |
| Eif2ak4   | Elav1   | Enpp5    |
| Eif2b1    | Elf1    | Ensa     |
| Eif2b2    | Elf2    | Entpd1   |
| Eif2b3    | Elf4    | Entpd4   |
| Eif2b4    | Elk1    | Entpd5   |
| Eif2b5    | Elk3    | Entpd6   |
| Eif2c1    | Elk4    | Entpd7   |
| Eif2c2    | Ell     | Eny2     |
| Eif2c3    | Ell3    | Ep300    |
| Eif2s1    | Elmo1   | Ep400    |
| Eif2s2    | Elmo2   | Epb4.1   |
| Eif2s3x   | Elmod2  | Epb4.1l2 |
| Eif3a     | Elmod3  | Epc1     |
| Eif3b     | Elof1   | Epc2     |
| Eif3c     | Elov1   | Epcam    |
| Eif3d     | Elov5   | Ephb2    |
| Eif3e     | Elov6   | Ephb6    |
| Eif3f     | Elp2    | Epm2aip1 |
| Eif3g     | Elp3    | Epn1     |
| Eif3h     | Elp4    | Eprs     |
| Eif3i     | Emb     | Eps15    |
| Eif3k     | Emd     | Epsti1   |
| Eif3l     | Eme1    | Eral1    |
| Eif3m     | Eme2    | Erap1    |
| Eif4a1    | Emg1    | Erb2ip   |
| Eif4a2    | Emid1   | Erb3     |
| Eif4a3    | Emilin1 | Erc1     |
| Eif4b     | Eml3    | Erc2     |
| Eif4e     | Eml4    | Erc3     |
| Eif4e2    | Eml5    | Erc4     |
| Eif4e3    | Emp1    | Erc5     |
| Eif4ebp2  | Emp3    | Erc6     |
| Eif4enif1 | Enc1    | Erc6l    |
| Eif4g2    | Endog   | Erc8     |
| Eif4g3    | Endou   | Erf      |
| Eif4h     | Eng     | Ergic1   |
| Eif5      | Engase  | Ergic2   |
| Eif5a     | Eno1    | Ergic3   |
| Eif5a2    | Eno2    | Erh      |
| Eif5b     | Eno3    | Eri1     |

|        |               |          |
|--------|---------------|----------|
| Eri2   | Exoc2         | Fahd2a   |
| Eri3   | Exoc3         | Faim     |
| Erich1 | Exoc3l        | Fam100a  |
| Erlec1 | Exoc4         | Fam100b  |
| Erlin1 | Exoc5         | Fam102b  |
| Erlin2 | Exoc6         | Fam103a1 |
| Ermp1  | Exoc6b        | Fam105a  |
| Ern1   | Exoc7         | Fam105b  |
| Ero1l  | Exoc8         | Fam108a  |
| Ero1lb | Exog          | Fam108b  |
| Erp29  | Exosc1        | Fam108c  |
| Erp44  | Exosc10       | Fam109a  |
| Errfi1 | Exosc2        | Fam109b  |
| Esco1  | Exosc3        | Fam110a  |
| Esco2  | Exosc4        | Fam110b  |
| Esd    | Exosc5        | Fam113a  |
| Esf1   | Exosc6        | Fam113b  |
| Esm1   | Exosc7        | Fam114a2 |
| Espl1  | Exosc8        | Fam116a  |
| Esr1   | Exosc9        | Fam116b  |
| Esr2   | Ext1          | Fam117a  |
| Esrra  | Ext2          | Fam117b  |
| Esyt1  | Extl2         | Fam118a  |
| Esyt2  | Eya3          | Fam118b  |
| Etaa1  | Ezh1          | Fam120a  |
| Etf1   | Ezh2          | Fam120b  |
| Etfa   | Ezr           | Fam120c  |
| Etfb   | F13a1         | Fam122a  |
| Etfdh  | F2rl3         | Fam122b  |
| Etnk1  | F630043A04Rik | Fam123b  |
| Etohi1 | F630110N24Rik | Fam125a  |
| Ets2   | F8            | Fam125b  |
| Etv1   | F8a           | Fam126a  |
| Etv3   | Faah          | Fam126b  |
| Etv5   | Fabp5         | Fam129a  |
| Etv6   | Fadd          | Fam132b  |
| Evi5l  | Fads1         | Fam133b  |
| Evpl   | Fads2         | Fam134a  |
| Ewsr1  | Fads6         | Fam134b  |
| Exd1   | Faf1          | Fam134c  |
| Exd2   | Faf2          | Fam136a  |
| Exo1   | Fah           | Fam13a   |
| Exoc1  | Fahd1         | Fam13b   |

|          |         |         |
|----------|---------|---------|
| Fam149b  | Fam49a  | Fanci   |
| Fam151b  | Fam49b  | Fancl   |
| Fam158a  | Fam50a  | Fancm   |
| Fam160a2 | Fam53a  | Fank1   |
| Fam160b1 | Fam53b  | Far1    |
| Fam160b2 | Fam53c  | Farp2   |
| Fam161b  | Fam54a  | Fars2   |
| Fam162a  | Fam54b  | Farsa   |
| Fam165b  | Fam57a  | Farsb   |
| Fam167a  | Fam58b  | Fas     |
| Fam167b  | Fam60a  | Fasn    |
| Fam168a  | Fam63a  | Fastk   |
| Fam168b  | Fam63b  | Fastkd1 |
| Fam172a  | Fam64a  | Fastkd2 |
| Fam173a  | Fam65a  | Fastkd3 |
| Fam173b  | Fam69a  | Fastkd5 |
| Fam174a  | Fam69b  | Fau     |
| Fam175a  | Fam71e1 | Fbf1    |
| Fam175b  | Fam72a  | Fbl     |
| Fam176b  | Fam73a  | Fbp1    |
| Fam178a  | Fam73b  | Fbrsl1  |
| Fam179b  | Fam76a  | Fbxl12  |
| Fam185a  | Fam76b  | Fbxl14  |
| Fam188a  | Fam78a  | Fbxl17  |
| Fam188b  | Fam82a1 | Fbxl18  |
| Fam189b  | Fam82a2 | Fbxl19  |
| Fam18b   | Fam82b  | Fbxl20  |
| Fam192a  | Fam83d  | Fbxl21  |
| Fam193b  | Fam83e  | Fbxl22  |
| Fam195a  | Fam83g  | Fbxl3   |
| Fam195b  | Fam84b  | Fbxl4   |
| Fam199x  | Fam86   | Fbxl6   |
| Fam20b   | Fam92a  | Fbxl8   |
| Fam26f   | Fam96a  | Fbxo10  |
| Fam33a   | Fam96b  | Fbxo11  |
| Fam35a   | Fam98a  | Fbxo17  |
| Fam36a   | Fam98b  | Fbxo18  |
| Fam3a    | Fam98c  | Fbxo21  |
| Fam3c    | Fan1    | Fbxo22  |
| Fam40a   | Fanca   | Fbxo24  |
| Fam40b   | Fancb   | Fbxo25  |
| Fam45a   | Fancd2  | Fbxo28  |
| Fam48a   | Fancg   | Fbxo3   |

|         |          |         |
|---------|----------|---------|
| Fbxo30  | Fez2     | Fmnl3   |
| Fbxo31  | Fgd6     | Fmo5    |
| Fbxo32  | Fgf13    | Fmr1    |
| Fbxo33  | Fgfr1op  | Fn3k    |
| Fbxo34  | Fgfr1op2 | Fn3krp  |
| Fbxo36  | Fgfrl1   | Fnbp1   |
| Fbxo38  | Fggy     | Fnbp4   |
| Fbxo4   | Fgr      | Fndc3a  |
| Fbxo42  | Fh1      | Fndc8   |
| Fbxo45  | Fhit     | Fnip1   |
| Fbxo46  | Fhl2     | Fnta    |
| Fbxo47  | Fhl3     | Fntb    |
| Fbxo48  | Fhl4     | Fosb    |
| Fbxo5   | Fhod1    | Foxh1   |
| Fbxo6   | Fibp     | Foxj2   |
| Fbxo7   | Ficd     | Foxj3   |
| Fbxo8   | Fig4     | Foxk1   |
| Fbxo9   | Figl1    | Foxm1   |
| Fbxw10  | Fip1l1   | Foxn2   |
| Fbxw11  | Fis1     | Foxo1   |
| Fbxw17  | Fitm1    | Foxo3   |
| Fbxw2   | Fitm2    | Foxo4   |
| Fbxw4   | Fiz1     | Foxp1   |
| Fbxw5   | Fkbp15   | Foxp4   |
| Fbxw7   | Fkbp1a   | Foxred1 |
| Fbxw9   | Fkbp2    | Foxred2 |
| Fcf1    | Fkbp3    | Fpgt    |
| Fcho1   | Fkbp4    | Frat2   |
| Fcho2   | Fkbp5    | Frg1    |
| Fchsd1  | Fkbp7    | Frmd6   |
| Fchsd2  | Fkbp8    | Frmd8   |
| Fdft1   | Fkbpl    | Frs2    |
| Fdps    | Fkrp     | Frs3    |
| Fdx1    | Fktn     | Fryl    |
| Fdx1l   | Flad1    | Fth1    |
| Fdxacb1 | Flcn     | Ftl1    |
| Fdxr    | Fli1     | Fto     |
| Fech    | Flii     | Ftsj1   |
| Fem1a   | Flna     | Ftsj2   |
| Fem1b   | Flot2    | Ftsj3   |
| Fem1c   | Flt3l    | Ftsjd1  |
| Fen1    | Flywch2  | Ftsjd2  |
| Fermt3  | Fmnl1    | Fubp1   |

|               |            |        |
|---------------|------------|--------|
| Fubp3         | Gadd45g    | Gbp6   |
| Fuca1         | Gadd45gip1 | Gbp7   |
| Fuca2         | Gak        | Gbp9   |
| Fuk           | Gal3st3    | Gca    |
| Fundc1        | Galc       | Gcap14 |
| Fundc2        | Gale       | Gcc2   |
| Furin         | Galk1      | Gcdh   |
| Fus           | Galk2      | Gcfc1  |
| Fut10         | Galm       | Gch1   |
| Fut11         | Galns      | Gclc   |
| Fut8          | Galnt1     | Gclm   |
| Fuz           | Galnt10    | Gcn111 |
| Fv1           | Galnt11    | Gcsh   |
| Fxc1          | Galnt12    | Gdap2  |
| Fxn           | Galnt2     | Gde1   |
| Fxr1          | Galnt4     | Gdf9   |
| Fxr2          | Galnt6     | Gdi1   |
| Fxyd5         | Galnt7     | Gdi2   |
| Fyb           | Galt       | Gdpd1  |
| Fyco1         | Gamt       | Gemin4 |
| Fyn           | Gan        | Gemin5 |
| Fyttl1        | Ganab      | Gemin6 |
| Fzd5          | Ganc       | Gemin7 |
| Fzr1          | Gapdh      | Gemin8 |
| G0s2          | Gapvd1     | Gen1   |
| G2e3          | Gar1       | Get4   |
| G3bp1         | Garnl3     | Gfer   |
| G3bp2         | Gars       | Gfm1   |
| G630016D24Rik | Gart       | Gfm2   |
| G630090E17Rik | Gas2       | Gfod1  |
| G6pc3         | Gas2l3     | Gfod2  |
| G6pdx         | Gatad1     | Gfpt1  |
| Gaa           | Gatad2a    | Gga1   |
| Gab3          | Gatc       | Gga2   |
| Gabarap       | Gatsl2     | Gga3   |
| Gabarapl1     | Gba        | Ggct   |
| Gabarapl2     | Gba2       | Ggcx   |
| Gabbr1        | Gbas       | Ggh    |
| Gabpa         | Gbe1       | Ggnbp1 |
| Gabpb1        | Gbp2       | Ggnbp2 |
| Gabpb2        | Gbp3       | Ggps1  |
| Gabre         | Gbp4       | Ggt5   |
| Gadd45a       | Gbp5       | Ggt7   |



|         |         |         |
|---------|---------|---------|
| Ggta1   | Gmcl1   | Golga5  |
| Ghdc    | Gmds    | Golga7  |
| Ghitm   | Gmeb1   | Golgb1  |
| Gigyf2  | Gmeb2   | Golim4  |
| Gimap1  | Gmfb    | Golph3  |
| Gimap6  | Gmfg    | Golph3l |
| Gimap8  | Gmip    | Golt1b  |
| Gimap9  | Gmnn    | Gon4l   |
| Gin1    | Gmppa   | Gopc    |
| Gins1   | Gmppb   | Gorab   |
| Gins2   | Gmpr    | Gorasp1 |
| Gins3   | Gmpr2   | Gorasp2 |
| Gins4   | Gmps    | Gosr1   |
| Gipc1   | Gna11   | Gosr2   |
| Git1    | Gna12   | Got1    |
| Git2    | Gna13   | Got2    |
| Gja5    | Gnai2   | Gpaa1   |
| Gk5     | Gnai3   | Gpatch1 |
| Gla     | Gnaq    | Gpatch2 |
| Glb1    | Gnb1    | Gpatch3 |
| Glb1l   | Gnb1l   | Gpatch4 |
| Glcci1  | Gnb2    | Gpatch8 |
| Gle1    | Gnb2l1  | Gpbp1   |
| Glg1    | Gnb5    | Gpbp1l1 |
| Glipr2  | Gng10   | Gpc2    |
| Glmn    | Gng12   | Gpd1l   |
| Glo1    | Gng3    | Gpd2    |
| Glod4   | Gng5    | Gphn    |
| Glrx    | Gngt2   | Gpi1    |
| Glrx2   | Gnl1    | Gpkow   |
| Glrx3   | Gnl3    | Gpn1    |
| Glrx5   | Gnl3l   | Gpn2    |
| Gls     | Gnpat   | Gpn3    |
| Glt25d1 | Gnpda1  | Gpr107  |
| Glt8d1  | Gnpda2  | Gpr108  |
| Gltp    | Gnpnat1 | Gpr132  |
| Gltpd1  | Gnptab  | Gpr137  |
| Gltscr2 | Gnptg   | Gpr137c |
| Glud1   | Gns     | Gpr146  |
| Glul    | Golga1  | Gpr155  |
| Glyctk  | Golga2  | Gpr157  |
| Glyr1   | Golga3  | Gpr160  |
| Gm2a    | Golga4  | Gpr162  |

|         |          |        |
|---------|----------|--------|
| Gpr171  | Gstcd    | Guk1   |
| Gpr172b | Gstk1    | Gusb   |
| Gpr174  | Gstm1    | Gxylt1 |
| Gpr180  | Gstm4    | Gyg    |
| Gpr19   | Gsto2    | Gyk    |
| Gpr65   | Gstp1    | Gys1   |
| Gpr89   | Gstt1    | Gzf1   |
| Gprasp1 | Gstt2    | Gzma   |
| Gprasp2 | Gstz1    | H13    |
| Gps1    | Gtdc1    | H2-D1  |
| Gps2    | Gtf2a1   | H2-DMa |
| Gpsm1   | Gtf2a2   | H2-K1  |
| Gpsm2   | Gtf2b    | H2-Ke2 |
| Gpsm3   | Gtf2e1   | H2-Ke6 |
| Gpt     | Gtf2e2   | H2-M3  |
| Gpt2    | Gtf2f1   | H2-Oa  |
| Gramd1a | Gtf2f2   | H2-Q2  |
| Gramd4  | Gtf2h1   | H2-T10 |
| Grap    | Gtf2h2   | H2-T22 |
| Grap2   | Gtf2h3   | H2-T23 |
| Grb2    | Gtf2h4   | H2-T24 |
| Grcc10  | Gtf2h5   | H2afj  |
| Grhpr   | Gtf2i    | H2afv  |
| Gria3   | Gtf2ird1 | H2afx  |
| Grina   | Gtf2ird2 | H2afy  |
| Gripap1 | Gtf3a    | H2afz  |
| Grk4    | Gtf3c1   | H3f3a  |
| Grk5    | Gtf3c2   | H3f3b  |
| Grk6    | Gtf3c3   | H6pd   |
| Grlf1   | Gtf3c4   | Habp4  |
| Grn     | Gtf3c5   | Hace1  |
| Grpel1  | Gtf3c6   | Hacl1  |
| Grpel2  | Gtl3     | Hadh   |
| Grsf1   | Gtpbp1   | Hadha  |
| Gsdmd   | Gtpbp10  | Hadhb  |
| Gse1    | Gtpbp2   | Hagh   |
| Gsg2    | Gtpbp3   | Haghl  |
| Gsk3a   | Gtpbp4   | Harbi1 |
| Gsk3b   | Gtpbp5   | Hars   |
| Gsn     | Gtpbp6   | Hars2  |
| Gspt1   | Gtpbp8   | Hat1   |
| Gsr     | Gtse1    | Haus1  |
| Gss     | Guf1     | Haus2  |

|         |         |           |
|---------|---------|-----------|
| Haus3   | Hectd2  | Hira      |
| Haus4   | Hectd3  | Hirip3    |
| Haus5   | Heg1    | Hist1h1a  |
| Haus6   | Helb    | Hist1h1b  |
| Haus7   | Hells   | Hist1h1c  |
| Haus8   | Helq    | Hist1h1d  |
| Hax1    | Helz    | Hist1h1e  |
| Hbp1    | Hemk1   | Hist1h2ab |
| Hbs1l   | Herc1   | Hist1h2ac |
| Hccs    | Herc2   | Hist1h2ae |
| Hcfc1   | Herc3   | Hist1h2af |
| Hcfc1r1 | Herc4   | Hist1h2ag |
| Hcfc2   | Herc6   | Hist1h2ai |
| Hcls1   | Herpud1 | Hist1h2ak |
| Hcn3    | Herpud2 | Hist1h2an |
| Hcst    | Hes5    | Hist1h2bb |
| Hdac1   | Hes6    | Hist1h2bc |
| Hdac10  | Hexa    | Hist1h2be |
| Hdac11  | Hexb    | Hist1h2bf |
| Hdac2   | Hexdc   | Hist1h2bg |
| Hdac3   | Hexim1  | Hist1h2bh |
| Hdac5   | Hexim2  | Hist1h2bj |
| Hdac6   | Hfe     | Hist1h2bk |
| Hdac7   | Hfm1    | Hist1h2bl |
| Hdac8   | Hgs     | Hist1h2bm |
| Hddc2   | Hgsnat  | Hist1h2bn |
| Hddc3   | Hhat    | Hist1h2bp |
| Hdgf    | Hiatl1  | Hist1h3a  |
| Hdgfrp2 | Hibadh  | Hist1h3c  |
| Hdhd2   | Hibch   | Hist1h3e  |
| Hdhd3   | Hic2    | Hist1h3f  |
| Hdlbp   | Hif1an  | Hist1h3g  |
| Heatr1  | Higd1a  | Hist1h3h  |
| Heatr2  | Higd2a  | Hist1h3i  |
| Heatr3  | Hinfp   | Hist1h4a  |
| Heatr5a | Hint1   | Hist1h4b  |
| Heatr5b | Hint2   | Hist1h4c  |
| Heatr6  | Hint3   | Hist1h4d  |
| Heatr7a | Hip1    | Hist1h4f  |
| Hebp1   | Hip1r   | Hist1h4h  |
| Hebp2   | Hipk1   | Hist1h4i  |
| Heca    | Hipk2   | Hist1h4j  |
| Hectd1  | Hipk3   | Hist1h4k  |

|           |          |          |
|-----------|----------|----------|
| Hist1h4m  | Hnrnpab  | Hsd11    |
| Hist2h2ab | Hnrnpc   | Hsd12    |
| Hist2h2ac | Hnrnpd   | Hsf1     |
| Hist2h2bb | Hnrnpf   | Hsf2     |
| Hist2h2be | Hnrnph1  | Hsf2bp   |
| Hist2h3b  | Hnrnph2  | Hsh2d    |
| Hist2h3c1 | Hnrnph3  | Hsp90ab1 |
| Hist2h4   | Hnrnpk   | Hsp90b1  |
| Hist3h2a  | Hnrnpl   | Hspa13   |
| Hist3h2ba | Hnrnpm   | Hspa14   |
| Hist4h4   | Hnrnpr   | Hspa4    |
| Hivep1    | Hnrnpu   | Hspa4l   |
| Hivep2    | Hnrnpul1 | Hspa5    |
| Hivep3    | Hnrnpul2 | Hspa8    |
| Hjurp     | Hnrpdl   | Hspa9    |
| Hk2       | Hnrpll   | Hspb11   |
| Hlcs      | Homer1   | Hspb6    |
| Hlff      | Homer3   | Hspb9    |
| Hmbox1    | Hook1    | Hspbap1  |
| Hmbs      | Hook2    | Hspbpb1  |
| Hmg20a    | Hook3    | Hspd1    |
| Hmg20b    | Hp1bp3   | Hspe1    |
| Hmga1     | Hpcal1   | Hsph1    |
| Hmgb1     | Hprt     | Htatip2  |
| Hmgb3     | Hps1     | Htatsf1  |
| Hmgcl     | Hps3     | Htra2    |
| Hmgcr     | Hps4     | Htt      |
| Hmgcs2    | Hps5     | Hus1     |
| Hmgn1     | Hps6     | Huwe1    |
| Hmgn2     | Hpse     | Hyal2    |
| Hmgn5     | Hras1    | Hyal3    |
| Hmgxb3    | Hrh2     | Hyi      |
| Hmgxb4    | Hrsp12   | Hyls1    |
| Hmha1     | Hs2st1   | Hyou1    |
| Hmmr      | Hs6st1   | lah1     |
| Hmox1     | Hsbp1    | lars     |
| Hmox2     | Hscb     | lars2    |
| Hn1       | Hsd11b1  | Icam1    |
| Hn1l      | Hsd17b10 | Icam2    |
| Hnrnpa0   | Hsd17b11 | Ick      |
| Hnrnpa1   | Hsd17b12 | Icmt     |
| Hnrnpa2b1 | Hsd17b4  | Ict1     |
| Hnrnpa3   | Hsd17b7  | Id3      |

|         |         |        |
|---------|---------|--------|
| ldh1    | lkbkap  | Impdh2 |
| ldh2    | lkbkb   | Inadl  |
| ldh3a   | lkbke   | Inca1  |
| ldh3b   | lkbkg   | Incenp |
| ldh3g   | lkzf1   | Ing1   |
| ldi1    | lkzf2   | Ing2   |
| lds     | lkzf3   | Ing3   |
| ldua    | lkzf4   | Ing4   |
| ler2    | lkzf5   | Ing5   |
| ler3ip1 | ll10ra  | Inhba  |
| ler5    | ll10rb  | Ino80  |
| lffo1   | ll12rb1 | Ino80b |
| lfi203  | ll12rb2 | Ino80c |
| lfi2711 | ll15ra  | Ino80d |
| lfi35   | ll17ra  | Ino80e |
| lfih1   | ll17rb  | Inpp1  |
| lfit2   | ll17rc  | Inpp4a |
| lfnar1  | ll17re  | Inpp5a |
| lfnar2  | ll1rap  | Inpp5b |
| lfngr1  | ll1rl2  | Inpp5d |
| lfngr2  | ll20ra  | Inpp5e |
| lfrd1   | ll21r   | Inpp5f |
| lfrd2   | ll27ra  | Inpp5k |
| lft122  | ll2rg   | Insig1 |
| lft140  | ll3ra   | Insl6  |
| lft172  | ll4i1   | Insr   |
| lft20   | ll4ra   | Ints1  |
| lft27   | ll6st   | Ints10 |
| lft46   | llf2    | Ints12 |
| lft52   | llf3    | Ints2  |
| lft57   | llk     | Ints3  |
| lft74   | llkap   | Ints4  |
| lft80   | llvbl   | Ints5  |
| lft81   | lmp1l   | Ints6  |
| lft88   | lmp2l   | Ints7  |
| lgbp1   | lmmt    | Ints8  |
| lgf2r   | lmp3    | Ints9  |
| lghmbp2 | lmp4    | Invs   |
| lgsf10  | lmpa1   | lp6k1  |
| lgsf3   | lmpa2   | lpmk   |
| lgtp    | lmpact  | lpo11  |
| lk      | lmpad1  | lpo13  |
| lkbip   | lmpdh1  | lpo4   |

lpo5  
lpo7  
lpo8  
lpo9  
lpp  
lppk  
lqcb1  
lqcc  
lqcd  
lqce  
lqcg  
lqck  
lqgap1  
lqgap2  
lqgap3  
lrak1  
lrak1bp1  
lrak2  
lrak4  
lreb2  
lrf1  
lrf2  
lrf2bp1  
lrf2bp2  
lrf3  
lrf7  
lrf9  
lrgm1  
lrgm2  
lrgq  
lrs2  
lsca1  
lsca2  
lscu  
lsg15  
lsg20  
lsg20l2  
lsoc1  
lsoc2b  
lspd  
lsy1  
lsyna1  
ltch

ltfg1  
ltfg2  
ltfg3  
ltga4  
ltga5  
ltgal  
ltgav  
ltgb1  
ltgb1bp1  
ltgb2  
ltgb3  
ltgb3bp  
ltgb4  
ltih5  
ltk  
ltm2a  
ltm2b  
ltm2c  
ltpa  
ltpk1  
ltpkb  
ltpkc  
ltpr1  
ltpr2  
ltpr3  
ltprp  
ltprpl1  
ltsn2  
lvd  
lvns1abp  
lws1  
lzumo4  
jagn1  
jak1  
jak2  
jak3  
jakmip1  
jarid2  
jhdm1d  
jmjd1c  
jmjd4  
jmjd5  
jmjd6

Jmjd8  
Jmy  
Josd1  
Josd2  
Jrk  
Jtb  
Jun  
Junb  
Jund  
Kank2  
Kars  
Kat2a  
Kat2b  
Kat5  
Katna1  
Katnal1  
Katnal2  
Katnb1  
Kbtbd11  
Kbtbd2  
Kbtbd3  
Kbtbd4  
Kbtbd7  
Kbtbd8  
Kcmf1  
Kcna3  
Kcnab2  
Kcnh2  
Kcnip2  
Kcnk5  
Kcnmb4  
Kcnn4  
Kcnq5  
Kctd1  
Kctd10  
Kctd11  
Kctd12b  
Kctd13  
Kctd17  
Kctd2  
Kctd20  
Kctd21  
Kctd3

|           |         |         |
|-----------|---------|---------|
| Kctd5     | Kif2c   | Klh24   |
| Kctd6     | Kif3a   | Klh25   |
| Kctd7     | Kif3b   | Klh26   |
| Kctd9     | Kif3c   | Klh28   |
| Kdelc1    | Kif4    | Klh3    |
| Kdelr2    | Kif5b   | Klh36   |
| Kdm1a     | Kif9    | Klh4    |
| Kdm1b     | Kifap3  | Klh5    |
| Kdm2a     | Kifc1   | Klh6    |
| Kdm2b     | Kifc2   | Klh7    |
| Kdm3a     | Kin     | Klh8    |
| Kdm3b     | Kiss1r  | Klh9    |
| Kdm4a     | Klc1    | Klraq1  |
| Kdm4b     | Klc3    | Kntc1   |
| Kdm4d     | Klc4    | Kpna2   |
| Kdm5a     | Klf1    | Kpna3   |
| Kdm5b     | Klf10   | Kpna4   |
| Kdm5c     | Klf11   | Kpna6   |
| Kdm6a     | Klf13   | Kpnb1   |
| Kdm6b     | Klf16   | Kptn    |
| Kdsr      | Klf3    | Kras    |
| Keap1     | Klf6    | Krba1   |
| Khdrbs1   | Klf7    | Krcc1   |
| Khk       | Klf8    | Kremen1 |
| Khyn      | Klhdc1  | Kri1    |
| Khsrp     | Klhdc10 | Krit1   |
| Kidins220 | Klhdc2  | Krr1    |
| Kif11     | Klhdc3  | Krt10   |
| Kif13b    | Klhdc4  | Krtcap2 |
| Kif14     | Klhdc5  | Krtcap3 |
| Kif15     | Klhdc8b | Ksr1    |
| Kif16b    | Klhdc9  | Kti12   |
| Kif17     | Klh10   | L2hgdh  |
| Kif18a    | Klh11   | L3mbtl2 |
| Kif18b    | Klh12   | L3mbtl3 |
| Kif1c     | Klh15   | I7Rn6   |
| Kif20a    | Klh17   | Lace1   |
| Kif20b    | Klh18   | Lactb   |
| Kif21b    | Klh2    | Lactb2  |
| Kif22     | Klh20   | Lage3   |
| Kif23     | Klh21   | Lamp1   |
| Kif24     | Klh22   | Lamp2   |
| Kif2a     | Klh23   | Lancl1  |

|         |          |          |
|---------|----------|----------|
| Lancl2  | Leng8    | LmIn     |
| Lap3    | Leo1     | Lmna     |
| Laptm4a | Lepre1   | Lmnb1    |
| Laptm4b | Leprel2  | Lmnb2    |
| Laptm5  | Leprot   | Lmo4     |
| Larp1   | Leprotl1 | Lnp      |
| Larp1b  | Letm1    | Lnpep    |
| Larp4   | Letm2    | Lnx1     |
| Larp4b  | Letmd1   | Lnx2     |
| Larp7   | Lgals1   | Loh12cr1 |
| Lars    | Lgals3bp | Lonp1    |
| Lars2   | Lgals9   | Lonp2    |
| Las1l   | Lgmn     | Lonrf1   |
| Lasp1   | Lhpp     | Loxl3    |
| Lass2   | Lias     | Lpar2    |
| Lass4   | Lig1     | Lpar4    |
| Lass5   | Lig3     | Lpar6    |
| Lass6   | Lig4     | Lpcat1   |
| Lat     | Lima1    | Lpcat3   |
| Lax1    | Limd1    | Lpcat4   |
| Layn    | Limd2    | Lpgat1   |
| Lbh     | Limk1    | Lphn1    |
| Lbr     | Limk2    | Lpin1    |
| Lca5    | Lims1    | Lpin2    |
| Lck     | Lin37    | Lpp      |
| Lclat1  | Lin54    | Lpxn     |
| Lcmt1   | Lin7c    | Lrba     |
| Lcmt2   | Lin9     | Lrch1    |
| Lcor    | Lingo4   | Lrch3    |
| Lcorl   | Lipa     | Lrch4    |
| Lcp1    | Lipe     | Lrdd     |
| Lcp2    | Lipt1    | Lrfn4    |
| Ldb1    | Lipt2    | Lrguk    |
| Ldhb    | Litaf    | Lrig1    |
| Ldlr    | Llgl1    | Lrig2    |
| Ldlrad3 | Llgl2    | Lrmp     |
| Ldoc1l  | Llph     | Lrp1     |
| Lect1   | Lman2    | Lrp10    |
| Lef1    | Lman2l   | Lrp12    |
| Lekr1   | Lmbr1l   | Lrp2bp   |
| Lemd2   | Lmbrd1   | Lrp5     |
| Lemd3   | Lmbrd2   | Lrp6     |
| Leng1   | Lmf2     | Lrp8     |



|         |        |          |
|---------|--------|----------|
| Lrpap1  | Lsm14a | Lzts2    |
| Lrpapr  | Lsm14b | M6pr     |
| Lrrc1   | Lsm2   | Macrocl  |
| Lrrc14  | Lsm3   | Mad111   |
| Lrrc2   | Lsm4   | Mad211   |
| Lrrc20  | Lsm6   | Mad211bp |
| Lrrc23  | Lsm7   | Madd     |
| Lrrc24  | Lsmd1  | Maea     |
| Lrrc27  | Lsp1   | Maf1     |
| Lrrc28  | Lss    | Maff     |
| Lrrc29  | Lst1   | Mafg     |
| Lrrc33  | Lta4h  | Mafk     |
| Lrrc40  | Ltb    | Mageb3   |
| Lrrc41  | Ltc4s  | Maged1   |
| Lrrc42  | Ltv1   | Maged2   |
| Lrrc45  | Luc7l  | Magee1   |
| Lrrc46  | Luc7l2 | Magee2   |
| Lrrc47  | Luc7l3 | Magi3    |
| Lrrc48  | Lxn    | Magoh    |
| Lrrc49  | Ly6d   | Magt1    |
| Lrrc50  | Ly6e   | Mak16    |
| Lrrc51  | Ly6k   | Malt1    |
| Lrrc56  | Ly75   | Maml1    |
| Lrrc57  | Ly9    | Maml3    |
| Lrrc58  | Ly96   | Man1a    |
| Lrrc59  | Lyar   | Man1a2   |
| Lrrc61  | Lyl1   | Man1b1   |
| Lrrc63  | Lynx1  | Man2a1   |
| Lrrc8a  | Lypla1 | Man2a2   |
| Lrrc8b  | Lypla2 | Man2b1   |
| Lrrc8c  | Lypla1 | Man2b2   |
| Lrrc8d  | Lyrml  | Man2c1   |
| Lrrc9   | Lyrml2 | Manba    |
| Lrrcc1  | Lyrml4 | Manbal   |
| Lrrfip2 | Lyrml5 | Manea    |
| Lrrk2   | Lyrml7 | Manf     |
| Lrsam1  | Lysmd1 | Mansc1   |
| Lrwd1   | Lysmd3 | Maoa     |
| Lsg1    | Lysmd4 | Map1lc3a |
| Lsm1    | Lyst   | Map1lc3b |
| Lsm10   | Lzic   | Map2k1   |
| Lsm11   | Lztl1  | Map2k2   |
| Lsm12   | Lztr1  | Map2k3   |

|           |         |        |
|-----------|---------|--------|
| Map2k4    | Marcks  | Mcf2l  |
| Map2k5    | Marcks1 | Mcfd2  |
| Map2k6    | Mark2   | Mcl1   |
| Map2k7    | Mark3   | Mcm10  |
| Map3k1    | Mark4   | Mcm2   |
| Map3k10   | Mars    | Mcm3   |
| Map3k11   | Mars2   | Mcm3ap |
| Map3k12   | Mast2   | Mcm4   |
| Map3k14   | Mast3   | Mcm5   |
| Map3k15   | Mastl   | Mcm6   |
| Map3k2    | Mat2a   | Mcm7   |
| Map3k3    | Mat2b   | Mcm8   |
| Map3k4    | Matn2   | Mcm9   |
| Map3k5    | Matr3   | Mcoln1 |
| Map3k6    | Mavs    | Mcoln2 |
| Map3k7    | Max     | Mcph1  |
| Map3k8    | Maz     | Mcrs1  |
| Map4k1    | Mbd1    | Mctp2  |
| Map4k2    | Mbd2    | Mcts1  |
| Map4k3    | Mbd3    | Mdc1   |
| Map4k4    | Mbd4    | Mdfic  |
| Map4k5    | Mbd5    | Mdh1   |
| Mapk1     | Mbd6    | Mdh2   |
| Mapk14    | Mbip    | Mdm1   |
| Mapk1ip1  | Mblac1  | Mdm2   |
| Mapk1ip1l | Mblac2  | Mdm4   |
| Mapk3     | Mbnl1   | Mdn1   |
| Mapk6     | Mbnl2   | Mdp1   |
| Mapk7     | Mbnl3   | Me2    |
| Mapk8     | Mboat1  | Me3    |
| Mapk8ip3  | Mboat2  | Mea1   |
| Mapk9     | Mboat4  | Meaf6  |
| Mapkap1   | Mboat7  | Mecp2  |
| Mapkapk2  | Mbp     | Mecr   |
| Mapkapk3  | Mbtd1   | Med1   |
| Mapkapk5  | Mbtps1  | Med10  |
| Mapkbp1   | Mbtps2  | Med11  |
| Mapre1    | Mcart1  | Med12  |
| 40238     | Mcart6  | Med13  |
| 40239     | Mcat    | Med13l |
| 40241     | Mccc1   | Med14  |
| 40242     | Mccc2   | Med15  |
| 40243     | Mcee    | Med16  |

|          |         |         |
|----------|---------|---------|
| Med17    | Mettl8  | Mier2   |
| Med18    | Mettl9  | Mier3   |
| Med19    | Mex3a   | Mif     |
| Med20    | Mex3c   | Mif4gd  |
| Med21    | Mex3d   | Miip    |
| Med22    | Mfap1a  | Mina    |
| Med23    | Mfap1b  | Mink1   |
| Med24    | Mfap3   | Minpp1  |
| Med25    | Mff     | Mios    |
| Med26    | Mfge8   | Mipep   |
| Med27    | Mfhas1  | Mipol1  |
| Med28    | Mfn1    | Mis12   |
| Med29    | Mfn2    | Mitd1   |
| Med30    | Mfng    | Mitf    |
| Med31    | Mfsd1   | Mki67ip |
| Med4     | Mfsd10  | Mkks    |
| Med6     | Mfsd11  | Mkl1    |
| Med7     | Mfsd2a  | Mkl2    |
| Med8     | Mfsd3   | Mkln1   |
| Med9     | Mfsd5   | Mknk1   |
| Mef2a    | Mfsd6   | Mknk2   |
| Mef2b    | Mfsd7b  | Mkrn1   |
| Mef2d    | Mfsd8   | Mkrn2   |
| Megf9    | Mfsd9   | Mkrn3   |
| Melk     | Mga     | Mks1    |
| Memo1    | Mgat1   | Mlec    |
| Men1     | Mgat2   | Mlf1ip  |
| Mepce    | Mgat4a  | Mlf2    |
| Mesdc1   | Mgat4b  | Mlh1    |
| Mesdc2   | Mgat5   | Mlh3    |
| Metap1   | Mgea5   | Mkl     |
| Metap2   | Mgmt    | Mll1    |
| Metrn    | Mgrn1   | Mll2    |
| Mettl10  | Mgst2   | Mll3    |
| Mettl11a | Mgst3   | Mll5    |
| Mettl13  | Mia1    | Mllt1   |
| Mettl14  | Mib1    | Mllt10  |
| Mettl2   | Mib2    | Mllt11  |
| Mettl3   | Mical1  | Mllt3   |
| Mettl4   | Micall1 | Mllt6   |
| Mettl5   | Mid1ip1 | Mlst8   |
| Mettl6   | Midn    | Mlx     |
| Mettl7a1 | Mier1   | Mlxip   |

|           |         |         |
|-----------|---------|---------|
| Mlycd     | Mppe1   | Mrpl4   |
| Mmaa      | Mprip   | Mrpl40  |
| Mmab      | Mpst    | Mrpl41  |
| Mmachc    | Mpv171  | Mrpl42  |
| Mmadhc    | Mpv1712 | Mrpl43  |
| Mmgt1     | Mpz11   | Mrpl44  |
| Mms19     | Mpz13   | Mrpl45  |
| Mnat1     | Mr1     | Mrpl46  |
| Mnd1      | Mre11a  | Mrpl47  |
| Mns1      | Mrfap1  | Mrpl48  |
| Mnt       | Mrgpre  | Mrpl49  |
| Moap1     | Mri1    | Mrpl50  |
| Mocos     | Mrm1    | Mrpl51  |
| Mocs1     | Mrp63   | Mrpl52  |
| Mocs2     | Mrpl1   | Mrpl53  |
| Mocs3     | Mrpl10  | Mrpl54  |
| Mogs      | Mrpl11  | Mrpl55  |
| Mon1a     | Mrpl12  | Mrpl9   |
| Mon1b     | Mrpl13  | Mrps10  |
| Mon2      | Mrpl14  | Mrps11  |
| Morc2a    | Mrpl15  | Mrps12  |
| Morc3     | Mrpl16  | Mrps14  |
| Morf4l1   | Mrpl17  | Mrps15  |
| Morf4l2   | Mrpl18  | Mrps16  |
| Morn1     | Mrpl19  | Mrps17  |
| Morn2     | Mrpl2   | Mrps18a |
| Morn5     | Mrpl20  | Mrps18b |
| Mosc2     | Mrpl21  | Mrps18c |
| Mospd1    | Mrpl22  | Mrps2   |
| Mospd2    | Mrpl23  | Mrps21  |
| Mospd3    | Mrpl24  | Mrps22  |
| Mov10     | Mrpl27  | Mrps23  |
| Mpdu1     | Mrpl28  | Mrps25  |
| Mphosph10 | Mrpl3   | Mrps26  |
| Mphosph6  | Mrpl30  | Mrps27  |
| Mphosph8  | Mrpl32  | Mrps28  |
| Mphosph9  | Mrpl33  | Mrps30  |
| Mpi       | Mrpl34  | Mrps31  |
| Mpnd      | Mrpl35  | Mrps33  |
| Mpp1      | Mrpl36  | Mrps34  |
| Mpp5      | Mrpl37  | Mrps35  |
| Mpp6      | Mrpl38  | Mrps36  |
| Mpp7      | Mrpl39  | Mrps5   |

|         |         |         |
|---------|---------|---------|
| Mrps6   | Mthfd1  | Mxd4    |
| Mrps7   | Mthfd11 | Mxi1    |
| Mrps9   | Mthfd2  | Mxra7   |
| Mrrf    | Mthfd21 | Mxra8   |
| Mrs2    | Mthfr   | Myb     |
| Mrto4   | Mthfsd  | Mybbp1a |
| Ms4a6b  | Mtif2   | Mybl1   |
| Msh2    | Mtif3   | Mybl2   |
| Msh3    | Mtl5    | Myc     |
| Msh5    | Mtm1    | Mycbp   |
| Msh6    | Mtmr1   | Mycbp2  |
| Msi2    | Mtmr10  | Myd88   |
| Msl1    | Mtmr12  | Myef2   |
| Msl2    | Mtmr14  | Myeov2  |
| Msl3    | Mtmr2   | Myg1    |
| Msl3l2  | Mtmr3   | Myh9    |
| Msn     | Mtmr4   | Myl12b  |
| Msrb2   | Mtmr6   | Myl4    |
| Mst1    | Mtmr9   | Myl6b   |
| Msto1   | Mto1    | Mylip   |
| Mta1    | Mtor    | Mylpf   |
| Mta2    | Mtpap   | Mynn    |
| Mta3    | Mtpn    | Myo10   |
| Mtap    | Mtr     | Myo18a  |
| Mtap1s  | Mtrf1   | Myo19   |
| Mtap4   | Mtrf11  | Myo1c   |
| Mtap7d1 | Mtrr    | Myo1g   |
| Mtap7d3 | Mtss1   | Myo5a   |
| Mtap9   | Mtx1    | Myo6    |
| Mtbp    | Mtx2    | Myo7a   |
| Mtch1   | Mtx3    | Myo9a   |
| Mtch2   | Mudeng  | Myo9b   |
| Mtcp1   | Mul1    | Myof    |
| Mtdh    | Mum1    | Mysm1   |
| Mterf   | Mus81   | Myst1   |
| Mterfd1 | Mut     | Myst2   |
| Mterfd2 | Muted   | Myst3   |
| Mterfd3 | Mutyh   | Mzf1    |
| Mtf1    | Mvd     | Mzt1    |
| Mtf2    | Mvk     | Mzt2    |
| Mtfmt   | Mvp     | N4bp1   |
| Mtfr1   | Mxd1    | N4bp2   |
| Mtg1    | Mxd3    | N4bp211 |

|         |         |         |
|---------|---------|---------|
| N4bp2l2 | Nat15   | Ndrg2   |
| N6amt1  | Nat2    | Ndrg3   |
| N6amt2  | Nat6    | Ndst1   |
| Naa10   | Nat9    | Ndufa1  |
| Naa15   | Nbeal1  | Ndufa10 |
| Naa16   | Nbeal2  | Ndufa11 |
| Naa20   | Nbn     | Ndufa12 |
| Naa25   | Nbr1    | Ndufa13 |
| Naa30   | Ncald   | Ndufa2  |
| Naa35   | Ncapd2  | Ndufa3  |
| Naa38   | Ncapd3  | Ndufa4  |
| Naa50   | Ncapg   | Ndufa5  |
| Naaa    | Ncapg2  | Ndufa6  |
| Nab1    | Ncaph   | Ndufa7  |
| Nab2    | Ncaph2  | Ndufa8  |
| Naca    | Ncbp1   | Ndufa9  |
| Nacc1   | Ncbp2   | Ndufab1 |
| Nadk    | Ncdn    | Ndufaf1 |
| Nadsyn1 | Nceh1   | Ndufaf2 |
| Nae1    | Nck1    | Ndufaf3 |
| Naf1    | Nck2    | Ndufaf4 |
| Naga    | Nckap1l | Ndufb10 |
| Nagk    | Nckap5l | Ndufb11 |
| Naglu   | Nckipsd | Ndufb2  |
| Nagpa   | Ncl     | Ndufb3  |
| Naif1   | Ncln    | Ndufb4  |
| Nampt   | Ncoa1   | Ndufb5  |
| Nanos1  | Ncoa2   | Ndufb6  |
| Nans    | Ncoa3   | Ndufb7  |
| Nap1l1  | Ncoa4   | Ndufb8  |
| Nap1l3  | Ncoa5   | Ndufb9  |
| Nap1l4  | Ncoa6   | Ndufc1  |
| Napa    | Ncoa7   | Ndufc2  |
| Napb    | Ncor1   | Ndufs1  |
| Napepld | Ncor2   | Ndufs2  |
| Napg    | Ncstn   | Ndufs3  |
| Narf    | Ndc80   | Ndufs4  |
| Narfl   | Nde1    | Ndufs5  |
| Narg2   | Ndfip1  | Ndufs6  |
| Nars    | Ndfip2  | Ndufs7  |
| Nars2   | Ndnl2   | Ndufs8  |
| Nasp    | Ndor1   | Ndufv1  |
| Nat10   | Ndrg1   | Ndufv2  |

|          |           |        |
|----------|-----------|--------|
| Ndufv3   | Nfkbiz    | Nme1   |
| Necab3   | Nfrkb     | Nme2   |
| Necap1   | Nfs1      | Nme3   |
| Necap2   | Nfu1      | Nme4   |
| Nedd1    | Nfx1      | Nme6   |
| Nedd4    | Nfxl1     | Nme7   |
| Nedd4l   | Nfya      | Nmi    |
| Nedd9    | Nfyb      | Nmnat1 |
| Nefh     | Ngdn      | Nmral1 |
| Neil1    | Ngfrap1   | Nmt1   |
| Neil3    | Ngly1     | Nmt2   |
| Nek1     | Ngrn      | Nob1   |
| Nek2     | Nhlrc1    | Noc3l  |
| Nek3     | Nhlrc2    | Noc4l  |
| Nek4     | Nhlrc3    | Nod1   |
| Nek6     | Nhp2      | Nol10  |
| Nek7     | Nhp2l1    | Nol11  |
| Nek8     | Nicn1     | Nol12  |
| Nek9     | Nif3l1    | Nol6   |
| Nelf     | Nin       | Nol7   |
| Nenf     | Ninj1     | Nol8   |
| Net1     | Ninl      | Nol9   |
| Neto2    | Nip7      | Nolc1  |
| Neu1     | Nipa2     | Nom1   |
| Neu3     | Nipal1    | Nomo1  |
| Neurl2   | Nipal3    | Nono   |
| Neurl4   | Nipbl     | Nop10  |
| Nf1      | Nipsnap1  | Nop14  |
| Nf2      | Nipsnap3b | Nop16  |
| Nfat5    | Nisch     | Nop2   |
| Nfatc2ip | Nit1      | Nop56  |
| Nfatc3   | Nit2      | Nop58  |
| Nfe2     | Nkap      | Nosip  |
| Nfe2l1   | Nkiras1   | Notch1 |
| Nfe2l2   | Nkiras2   | Notch3 |
| Nfic     | Nkrf      | Noxo1  |
| Nfkb1    | Nktr      | Npat   |
| Nfkb2    | Nle1      | Npc1   |
| Nfkbia   | Nlk       | Npc2   |
| Nfkbib   | Nlrc3     | Npepl1 |
| Nfkbid   | Nlrx1     | Npepps |
| Nfkbie   | Nmb       | Nphp1  |
| Nfkbil1  | Nmd3      | Nphp3  |

|         |          |        |
|---------|----------|--------|
| Nphp4   | Nsun4    | Nufip1 |
| Nphs2   | Nsun5    | Nufip2 |
| Npl     | Nsun6    | Numa1  |
| Nploc4  | Nsun7    | Numb   |
| Npm1    | Nt5c     | Numbl  |
| Npm3    | Nt5c2    | Nup107 |
| Nprl2   | Nt5c3    | Nup133 |
| Nprl3   | Nt5c3l   | Nup153 |
| Nptn    | Nt5dc1   | Nup155 |
| Nptxr   | Nt5dc3   | Nup160 |
| Nqo2    | Nt5m     | Nup188 |
| Nr1d1   | Ntan1    | Nup205 |
| Nr1d2   | Nthl1    | Nup210 |
| Nr1h2   | Nub1     | Nup214 |
| Nr1h3   | Nubp1    | Nup35  |
| Nr2c1   | Nubp2    | Nup37  |
| Nr2c2   | Nubpl    | Nup43  |
| Nr2c2ap | Nucb1    | Nup50  |
| Nr3c1   | Nucb2    | Nup54  |
| Nr4a1   | Nucks1   | Nup62  |
| Nrarp   | Nudc     | Nup85  |
| Nras    | Nudcd1   | Nup88  |
| Nrbf2   | Nudcd2   | Nup93  |
| Nrbp1   | Nudcd3   | Nup98  |
| Nrd1    | Nudt1    | Nupl1  |
| Nrf1    | Nudt12   | Nupl2  |
| Nrg2    | Nudt13   | Nus1   |
| Nrgn    | Nudt14   | Nusap1 |
| Nrip1   | Nudt16   | Nutf2  |
| Nrm     | Nudt16l1 | Nvl    |
| Nrp1    | Nudt18   | Nwd1   |
| Nsa2    | Nudt19   | Nxf1   |
| Nsd1    | Nudt2    | Nxn    |
| Nsdhl   | Nudt21   | Nxt1   |
| Nsf     | Nudt22   | Nxt2   |
| Nsfl1c  | Nudt3    | Oas1b  |
| Nsg2    | Nudt4    | Oas1c  |
| Nsl1    | Nudt5    | Oasl1  |
| Nsmaf   | Nudt6    | Oat    |
| Nsmce1  | Nudt7    | Oaz1   |
| Nsmce2  | Nudt8    | Obfc1  |
| Nsun2   | Nudt9    | Obfc2a |
| Nsun3   | Nuf2     | Obfc2b |



|         |          |         |
|---------|----------|---------|
| Ocel1   | Osgep    | Paics   |
| Ociad1  | Osgepl1  | Paip1   |
| Ociad2  | Osgin2   | Paip2   |
| Ocrl    | Osm      | Paip2b  |
| Odc1    | Ost4     | Pak1    |
| Odf2    | Ostc     | Pak1ip1 |
| Odf2l   | Ostf1    | Pak2    |
| Odf3b   | Otub1    | Pak4    |
| Ofd1    | Otud1    | Pak6    |
| Ogdh    | Otud3    | Palb2   |
| Ogdhl   | Otud4    | Palm    |
| Ogfod1  | Otud5    | Pam     |
| Ogfod2  | Otud6b   | Pan2    |
| Ogfr    | Otud7b   | Pan3    |
| Ogfrl1  | Ovca2    | Pank1   |
| Ogg1    | Oxa1l    | Pank2   |
| Ogt     | Oxct1    | Pank3   |
| Oip5    | Oxnad1   | Pank4   |
| Olfml2a | Oxr1     | Panx1   |
| Oma1    | Oxsm     | Paax    |
| Opa1    | Oxsr1    | Papd4   |
| Opa3    | P2rx3    | Papd5   |
| Opn3    | P2rx4    | Papd7   |
| Orai1   | P2ry10   | Papolg  |
| Orai2   | P4ha1    | Papss1  |
| Orai3   | P4hb     | Papss2  |
| Oraov1  | P4htm    | Paqr3   |
| ORF19   | Pa2g4    | Paqr6   |
| ORF61   | Pabpc1   | Paqr7   |
| Ormdl1  | Pabpn1   | Paqr8   |
| Ormdl2  | Pacrg    | Pard6a  |
| Ormdl3  | Pacrgl   | Pard6g  |
| Os9     | Pacs1    | Parg    |
| Osbp    | Pacs2    | Park7   |
| Osbp11  | Pacsin1  | Parl    |
| Osbp12  | Pacsin2  | Parn    |
| Osbp13  | Padi2    | Parp1   |
| Osbp15  | Paf1     | Parp10  |
| Osbp17  | Pafah1b1 | Parp12  |
| Osbp18  | Pafah1b2 | Parp14  |
| Osbp19  | Pafah1b3 | Parp16  |
| Oscar   | Pafah2   | Parp2   |
| Oscp1   | Pag1     | Parp3   |

|        |         |         |
|--------|---------|---------|
| Parp4  | Pcyt2   | Pdxdc1  |
| Parp6  | Pdap1   | Pdxk    |
| Parp8  | Pdcd1   | Pd xp   |
| Parp9  | Pdcd10  | Pd zd11 |
| Pars2  | Pdcd11  | Pd zd4  |
| Parvg  | Pdcd2   | Pd zd8  |
| Pask   | Pdcd2l  | Pea15a  |
| Pate2  | Pdcd4   | Pe bp1  |
| Patl1  | Pdcd5   | Pec am1 |
| Patz1  | Pdcd6   | Peli1   |
| Paxip1 | Pdcd6ip | Pelo    |
| Pbk    | Pdcd7   | Pelp1   |
| Pbrm1  | Pdcl    | Pemt    |
| Pbx2   | Pdcl3   | Peo1    |
| Pbx4   | Pddc1   | Pepd    |
| Pbxip1 | Pde12   | Per1    |
| Pcbd2  | Pde3b   | Per2    |
| Pcbp1  | Pde5a   | Per3    |
| Pcbp2  | Pde6d   | Pes1    |
| Pcbp3  | Pde7a   | Pet112l |
| Pcca   | Pdgfrb  | Pex1    |
| Pccb   | Pdha1   | Pex10   |
| Pcf11  | Pd hb   | Pex11a  |
| Pcgf1  | Pd hx   | Pex11b  |
| Pcgf3  | Pdia3   | Pex11c  |
| Pcgf5  | Pdia4   | Pex12   |
| Pcgf6  | Pdia6   | Pex13   |
| Pcid2  | Pdik1l  | Pex14   |
| Pcif1  | Pdk1    | Pex16   |
| Pck2   | Pdk2    | Pex19   |
| Pcm1   | Pdk3    | Pex26   |
| Pcmt1  | Pdlim1  | Pex3    |
| Pcmtd1 | Pdlim2  | Pex5    |
| Pcmtd2 | Pdlim5  | Pex6    |
| Pcna   | Pdlim7  | Pex7    |
| Pcnp   | Pdp1    | Pfas    |
| Pcnt   | Pdp2    | Pfdn1   |
| Pcnx   | Pdpk1   | Pfdn2   |
| Pcnxl3 | Pdrg1   | Pfdn5   |
| Pcsk7  | Pds5a   | Pfkfb1  |
| Pctp   | Pds5b   | Pfkfb2  |
| Pcyox1 | Pdss1   | Pfkfb3  |
| Pcyt1a | Pdss2   | Pfkfb4  |

|         |          |         |
|---------|----------|---------|
| Pfkl    | Phf20    | Pigp    |
| Pfkm    | Phf20l1  | Pigq    |
| Pfkp    | Phf23    | Pigs    |
| Pfn1    | Phf5a    | Pigt    |
| Pfn4    | Phf6     | Pigu    |
| Pgam1   | Phf7     | Pigv    |
| Pgam5   | Phf8     | Pigw    |
| Pgap1   | Phgdh    | Pigx    |
| Pgap2   | Phip     | Pigy    |
| Pgap3   | Phka2    | Pigyl   |
| Pgbd1   | Phkb     | Pih1d1  |
| Pgcp    | Phkg1    | Pih1d2  |
| Pgd     | Phkg2    | Pik3ap1 |
| Pggt1b  | Phlda1   | Pik3c2b |
| Pgk1    | Phlda3   | Pik3c3  |
| Pgls    | Phlpp2   | Pik3ca  |
| Pglyrp2 | Phospho2 | Pik3cg  |
| Pgm1    | Phrf1    | Pik3ip1 |
| Pgm2    | Phtf1    | Pik3r1  |
| Pgm2l1  | Phtf2    | Pik3r2  |
| Pgm3    | Phyh     | Pik3r3  |
| Pgp     | Pi4k2a   | Pik3r4  |
| Pgpep1  | Pi4k2b   | Pik3r5  |
| Pgpep1l | Pi4ka    | Pikfyve |
| Pgrmc1  | Pi4kb    | Pim1    |
| Pgrmc2  | Pias1    | Pim2    |
| Pgs1    | Pias2    | Pim3    |
| Phactr2 | Pias3    | Pin1    |
| Phactr4 | Pias4    | Pin4    |
| Phax    | Pibf1    | Pink1   |
| Phb     | Picalm   | Pinx1   |
| Phb2    | Pick1    | Pion    |
| Phc1    | Pif1     | Pip4k2a |
| Phc2    | Piga     | Pip4k2b |
| Phc3    | Pigb     | Pip4k2c |
| Phf1    | Pigc     | Pip5k1a |
| Phf12   | Pigf     | Pip5k1b |
| Phf13   | Pigg     | Pip5k1c |
| Phf14   | Pigh     | Pisd    |
| Phf15   | Pigk     | Pitpna  |
| Phf16   | Pigl     | Pitpnb  |
| Phf19   | Pigm     | Pitpnc1 |
| Phf2    | Pigo     | Pitpnm1 |

|          |         |         |
|----------|---------|---------|
| Pitpnm2  | Plekhj1 | Pnpla2  |
| Pitrm1   | Plekhm1 | Pnpla6  |
| Pja1     | Plekhm2 | Pnpla7  |
| Pja2     | Plekhm3 | Pnpo    |
| Pkd1     | Plekho1 | Pnpt1   |
| Pkd1l3   | Plekho2 | Pnrc2   |
| Pkd2l2   | Plin2   | Poc1a   |
| Pkig     | Plin3   | Poc1b   |
| Pkm2     | Plk1    | Poc5    |
| Pkn1     | Plk1s1  | Pofut1  |
| Pkn3     | Plk3    | Pofut2  |
| Pknox1   | Plk4    | Pogk    |
| Pkp4     | Plod1   | Pogz    |
| Pla2g12a | Plod2   | Pola1   |
| Pla2g15  | Plod3   | Pola2   |
| Pla2g16  | Plp2    | Polb    |
| Pla2g4a  | Plrg1   | Pold1   |
| Pla2g4b  | Pls3    | Pold2   |
| Pla2g6   | Plscr1  | Pold3   |
| Plaa     | Plscr3  | Pold4   |
| Plac8    | Plscr4  | Poldip2 |
| Plagl2   | Plxdc1  | Poldip3 |
| Plcb2    | Plxdc2  | Pole    |
| Plcb3    | Plxna3  | Pole2   |
| Plcb4    | Plxnb1  | Pole3   |
| Plcg1    | Plxnd1  | Polg    |
| Plcl1    | Pmepa1  | Polg2   |
| Plcl2    | Pmf1    | Polh    |
| Plcx1    | Pml     | Poli    |
| Plcx2    | Pmm1    | Polk    |
| Plid3    | Pmm2    | Poll    |
| Plidn    | Pmpca   | Polm    |
| Plek     | Pmpcb   | Poln    |
| Plekha1  | Pms1    | Polq    |
| Plekha2  | Pms2    | Polr1a  |
| Plekha3  | Pmvk    | Polr1b  |
| Plekha4  | Pnck    | Polr1c  |
| Plekha5  | Pnkd    | Polr1d  |
| Plekha7  | Pnkp    | Polr1e  |
| Plekha2  | Pnma1   | Polr2a  |
| Plekha2  | Pnn     | Polr2b  |
| Plekha2  | Pno1    | Polr2c  |
| Plekha2  | Pnp     | Polr2d  |

|          |          |         |
|----------|----------|---------|
| Polr2e   | Ppdpf    | Ppp1r3b |
| Polr2f   | Ppfibp1  | Ppp1r3f |
| Polr2g   | Ppfibp2  | Ppp1r7  |
| Polr2h   | Pphln1   | Ppp1r8  |
| Polr2i   | Ppia     | Ppp1r9b |
| Polr2j   | Ppib     | Ppp2ca  |
| Polr2k   | Ppid     | Ppp2cb  |
| Polr3a   | Ppie     | Ppp2r1a |
| Polr3b   | Ppif     | Ppp2r1b |
| Polr3c   | Ppig     | Ppp2r2a |
| Polr3d   | Ppih     | Ppp2r2d |
| Polr3e   | Ppil1    | Ppp2r3c |
| Polr3f   | Ppil2    | Ppp2r4  |
| Polr3g   | Ppil3    | Ppp2r5a |
| Polr3h   | Ppil4    | Ppp2r5b |
| Polr3k   | Ppil6    | Ppp2r5c |
| Polrmt   | Ppip5k2  | Ppp2r5d |
| Pom121   | Ppm1a    | Ppp2r5e |
| Pomgnt1  | Ppm1b    | Ppp3ca  |
| Pomp     | Ppm1d    | Ppp3cb  |
| Pomt1    | Ppm1e    | Ppp3cc  |
| Pomt2    | Ppm1f    | Ppp3r1  |
| Pon2     | Ppm1g    | Ppp4c   |
| Pon3     | Ppm1h    | Ppp4r1  |
| Pop1     | Ppm1k    | Ppp4r2  |
| Pop4     | Ppm1m    | Ppp5c   |
| Pop7     | Ppme1    | Ppp6c   |
| Pot1a    | Ppox     | Ppp6r1  |
| Pou2f1   | Ppp1ca   | Ppp6r2  |
| Pou2f2   | Ppp1cb   | Ppp6r3  |
| Pou6f1   | Ppp1cc   | Pppde1  |
| Ppa1     | Ppp1r10  | Pppde2  |
| Ppa2     | Ppp1r11  | Pprc1   |
| Ppan     | Ppp1r12a | Ppt1    |
| Ppap2a   | Ppp1r12b | Ppt2    |
| Ppap2c   | Ppp1r12c | Pptc7   |
| Ppapdc1b | Ppp1r14a | Ppwd1   |
| Ppapdc2  | Ppp1r14b | Pqbp1   |
| Ppard    | Ppp1r15a | Pqlc1   |
| Ppargc1b | Ppp1r15b | Pqlc2   |
| Ppat     | Ppp1r16a | Pqlc3   |
| Ppcdc    | Ppp1r16b | Praf2   |
| Ppcs     | Ppp1r2   | Pramef8 |

|          |           |         |
|----------|-----------|---------|
| Prc1     | Prkra     | Prune   |
| Prcc     | Prkrip1   | Psap    |
| Prcp     | Prkrir    | Psd3    |
| Prdm10   | Prkx      | Psd4    |
| Prdm11   | Prmt1     | Psen1   |
| Prdm15   | Prmt10    | Psenen  |
| Prdm2    | Prmt2     | Psip1   |
| Prdm4    | Prmt3     | Pskh1   |
| Prdm5    | Prmt5     | Psma1   |
| Prdm9    | Prmt6     | Psma2   |
| Prdx1    | Prmt7     | Psma3   |
| Prdx2    | Prnd      | Psma4   |
| Prdx3    | Prnp      | Psma5   |
| Prdx4    | Pros1     | Psma7   |
| Prdx5    | Prosapip1 | Psemb1  |
| Prdx6    | Prosc     | Psemb10 |
| Preb     | Prpf18    | Psemb2  |
| Prelid1  | Prpf19    | Psemb4  |
| Prelid2  | Prpf3     | Psemb5  |
| Prep     | Prpf31    | Psemb6  |
| Prepl    | Prpf38a   | Psemb7  |
| Prex1    | Prpf38b   | Psemb8  |
| Prickle1 | Prpf39    | Psemb9  |
| Prickle3 | Prpf4     | Psmc1   |
| Prim1    | Prpf40a   | Psmc2   |
| Prim2    | Prpf40b   | Psmc3   |
| Prkaa1   | Prpf4b    | Psmc3ip |
| Prkab1   | Prpf6     | Psmc4   |
| Prkab2   | Prpf8     | Psmc5   |
| Prkaca   | Prps1     | Psmc6   |
| Prkacb   | Prps2     | Psmc6   |
| Prkar1a  | Prpsap2   | Psmc6   |
| Prkar2b  | Prr11     | Psmc6   |
| Prkca    | Prr12     | Psmc6   |
| Prkcb    | Prr3      | Psmc6   |
| Prkcd    | Prr7      | Psmc6   |
| Prkch    | Prrc1     | Psmc6   |
| Prkci    | Prrg1     | Psmc6   |
| Prkcq    | Prrg2     | Psmc6   |
| Prkcsh   | Prrg4     | Psmc6   |
| Prkd2    | Prrt1     | Psmc6   |
| Prkd3    | Prrt2     | Psmc6   |
| Prkdc    | Prtg      | Psmc6   |

|         |        |           |
|---------|--------|-----------|
| Psmc9   | Ptplb  | Pxn       |
| Psme1   | Ptpmt1 | Pycard    |
| Psme2   | Ptpn1  | Pycr2     |
| Psme3   | Ptpn11 | Pycl      |
| Psme4   | Ptpn12 | Pygb      |
| Psmf1   | Ptpn18 | Pygo2     |
| Psmg1   | Ptpn2  | Pyhin1    |
| Psmg2   | Ptpn22 | Pyroxd1   |
| Psmg3   | Ptpn23 | Qars      |
| Psmg4   | Ptpn4  | Qdpr      |
| Pspc1   | Ptpn6  | Qk        |
| Psph    | Ptpn7  | Qpct      |
| Psrc1   | Ptpn9  | Qpctl     |
| Pstk    | Ptpn9  | Qrich1    |
| Pstpip1 | Ptpn9  | Qrs1      |
| Ptbp1   | Ptpn9  | Qser1     |
| Ptbp2   | Ptpn9  | Qsox1     |
| Ptcd1   | Ptpn9  | Qsox2     |
| Ptcd2   | Ptpn9  | Qtrt1     |
| Ptcd3   | Ptpn9  | R3hcc1    |
| Ptch1   | Ptpn9  | R3hdm1    |
| Ptcra   | Ptpn9  | Rab1      |
| Ptdss1  | Ptpn9  | Rab10     |
| Ptdss2  | Ptpn9  | Rab11a    |
| Pten    | Ptpn9  | Rab11b    |
| Pter    | Ptpn9  | Rab11fip1 |
| Ptger2  | Ptpn9  | Rab11fip2 |
| Ptger4  | Ptpn9  | Rab11fip4 |
| Ptges2  | Ptpn9  | Rab11fip5 |
| Ptges3  | Ptpn9  | Rab12     |
| Ptgr1   | Ptpn9  | Rab13     |
| Ptgr2   | Ptpn9  | Rab14     |
| Ptk2b   | Ptpn9  | Rab18     |
| Ptk7    | Ptpn9  | Rab19     |
| Ptma    | Ptpn9  | Rab1b     |
| Ptms    | Ptpn9  | Rab21     |
| Ptov1   | Ptpn9  | Rab22a    |
| Ptp4a1  | Ptpn9  | Rab23     |
| Ptp4a2  | Ptpn9  | Rab24     |
| Ptp4a3  | Ptpn9  | Rab27a    |
| Ptpdc1  | Ptpn9  | Rab28     |
| Ptpla   | Ptpn9  | Rab2a     |
| Ptplad1 | Ptpn9  | Rab2b     |

|          |          |          |
|----------|----------|----------|
| Rab32    | Rad51    | Rapgef1  |
| Rab33a   | Rad51ap1 | Rapgef2  |
| Rab33b   | Rad51c   | Rapgef3  |
| Rab35    | Rad51l1  | Rapgef6  |
| Rab3a    | Rad51l3  | Rapgef11 |
| Rab3d    | Rad52    | Rara     |
| Rab3gap1 | Rad54b   | Rars     |
| Rab3gap2 | Rad54l   | Rars2    |
| Rab3ip   | Rad54l2  | Rasa1    |
| Rab40c   | Rad9     | Rasa2    |
| Rab43    | Rad9b    | Rasa3    |
| Rab4a    | Rae1     | Rasa4    |
| Rab4b    | Raf1     | Rasal1   |
| Rab5a    | Rag1     | Rasal3   |
| Rab5b    | Rag2     | Rasgrp1  |
| Rab5c    | Rai1     | Rasgrp2  |
| Rab7     | Rai12    | Rasgrp4  |
| Rab7l1   | Rala     | Rasl11b  |
| Rab8a    | Ralb     | Rassf1   |
| Rab8b    | Ralbp1   | Rassf2   |
| Rab9     | Ralgapa1 | Rassf3   |
| Rabac1   | Ralgapa2 | Rassf4   |
| Rabep1   | Ralgapb  | Rassf7   |
| Rabep2   | Ralgds   | Raver1   |
| Rabepk   | Ralgps1  | Rb1      |
| Rabgap1  | Ralgps2  | Rbak     |
| Rabgap1l | Raly     | Rbbp4    |
| Rabgef1  | Ramp1    | Rbbp5    |
| Rabggta  | Ran      | Rbbp7    |
| Rabggtb  | Ranbp1   | Rbbp8    |
| Rabif    | Ranbp10  | Rbbp9    |
| Rabl2    | Ranbp2   | Rbck1    |
| Rabl3    | Ranbp3   | Rbks     |
| Rabl5    | Ranbp6   | Rbl1     |
| Rac1     | Ranbp9   | Rbl2     |
| Rac2     | Rangap1  | Rbm10    |
| Rad1     | Rangrf   | Rbm12    |
| Rad17    | Rap1a    | Rbm12b   |
| Rad18    | Rap1b    | Rbm14    |
| Rad21    | Rap1gds1 | Rbm15    |
| Rad23a   | Rap2a    | Rbm15b   |
| Rad23b   | Rap2b    | Rbm17    |
| Rad50    | Rap2c    | Rbm18    |



Rbm19  
Rbm22  
Rbm26  
Rbm27  
Rbm28  
Rbm3  
Rbm34  
Rbm38  
Rbm39  
Rbm4  
Rbm41  
Rbm42  
Rbm43  
Rbm44  
Rbm45  
Rbm4b  
Rbm5  
Rbm6  
Rbm7  
Rbm8a  
RbmX  
RbmX2  
Rc3h1  
Rc3h2  
Rcan1  
Rcan3  
Rcbtb1  
Rcc1  
Rcc2  
Rccd1  
Rce1  
Rchy1  
Rcl1  
Rcn1  
Rcn2  
Rcor1  
Rcor2  
Rcor3  
Rcsd1  
Rdbp  
Rdh10  
Rdh11  
Rdh12

Rdh13  
Rdh14  
Rdh5  
Rdm1  
Rdx  
Reck  
Recql  
Recql4  
Recql5  
Reep3  
Reep4  
Reep5  
Rel  
Rela  
Relb  
Rell1  
Rell2  
Relt  
Repin1  
Reps1  
Rer1  
Rere  
Rest  
Retsat  
Rev1  
Rev3l  
Rexo1  
Rexo2  
Rexo4  
Rfc1  
Rfc2  
Rfc3  
Rfc4  
Rfc5  
Rfesd  
Rffl  
Rfk  
Rfng  
Rft1  
Rftn1  
Rfwd2  
Rfwd3  
Rfx1

Rfx2  
Rfx3  
Rfx5  
Rfx7  
Rfxank  
Rfxap  
Rg9mtd1  
Rg9mtd2  
Rg9mtd3  
Rgl1  
Rgl2  
Rgp1  
Rgs10  
Rgs12  
Rgs14  
Rgs19  
Rgs2  
Rhbdd1  
Rhbdd2  
Rhbdd3  
Rhddf2  
Rheb  
Rhebl1  
Rhoa  
Rhobtb2  
Rhof  
Rhog  
Rhoh  
Rhot1  
Rhot2  
Ribc1  
Ric8  
Ric8b  
Rictor  
Rif1  
Rilp  
Rilpl1  
Rilpl2  
Rimbp3  
Rin3  
Ring1  
Rinl  
Rint1

|          |         |          |
|----------|---------|----------|
| Riok1    | Rnf151  | Rogdi    |
| Riok2    | Rnf157  | Rom1     |
| Riok3    | Rnf166  | Romo1    |
| Ripk1    | Rnf167  | Ropn1l   |
| Ripk2    | Rnf168  | Rorc     |
| Ripk3    | Rnf170  | Rp2h     |
| Rit1     | Rnf181  | Rpa1     |
| Rlf      | Rnf185  | Rpa2     |
| Rlim     | Rnf187  | Rpa3     |
| Rmi1     | Rnf19a  | Rpain    |
| Rmnd1    | Rnf19b  | Rpap1    |
| Rmnd5a   | Rnf2    | Rpap2    |
| Rmnd5b   | Rnf20   | Rpap3    |
| Rnase4   | Rnf214  | Rpe      |
| Rnaseh1  | Rnf215  | Rpf1     |
| Rnaseh2a | Rnf219  | Rpf2     |
| Rnaseh2b | Rnf24   | Rpgr     |
| Rnaseh2c | Rnf25   | Rpgrip1l |
| Rnasek   | Rnf26   | Rpia     |
| Rnasel   | Rnf31   | Rpl10    |
| Rnaset2a | Rnf32   | Rpl10a   |
| Rnaset2b | Rnf34   | Rpl11    |
| Rnd2     | Rnf40   | Rpl12    |
| Rnf10    | Rnf41   | Rpl13    |
| Rnf103   | Rnf44   | Rpl13a   |
| Rnf111   | Rnf5    | Rpl14    |
| Rnf113a1 | Rnf6    | Rpl15    |
| Rnf114   | Rnf7    | Rpl17    |
| Rnf115   | Rnf8    | Rpl18    |
| Rnf122   | Rnft1   | Rpl18a   |
| Rnf126   | Rnft2   | Rpl19    |
| Rnf13    | Rngtt   | Rpl21    |
| Rnf130   | Rnh1    | Rpl22    |
| Rnf135   | Rnls    | Rpl22l1  |
| Rnf138   | Rnmt    | Rpl23    |
| Rnf139   | Rnmtl1  | Rpl23a   |
| Rnf14    | Rnpc3   | Rpl24    |
| Rnf141   | Rnpep   | Rpl26    |
| Rnf144a  | Rnpepl1 | Rpl27    |
| Rnf144b  | Rnps1   | Rpl27a   |
| Rnf145   | Rock1   | Rpl28    |
| Rnf146   | Rock2   | Rpl3     |
| Rnf149   | Rod1    | Rpl31    |

|          |         |         |
|----------|---------|---------|
| Rpl32    | Rps2    | Rrm1    |
| Rpl34    | Rps20   | Rrm2    |
| Rpl35    | Rps21   | Rrm2b   |
| Rpl35a   | Rps23   | Rrn3    |
| Rpl36    | Rps24   | Rrp1    |
| Rpl36a   | Rps25   | Rrp12   |
| Rpl36al  | Rps26   | Rrp15   |
| Rpl37    | Rps27a  | Rrp1b   |
| Rpl37a   | Rps27l  | Rrp36   |
| Rpl38    | Rps28   | Rrp7a   |
| Rpl39    | Rps29   | Rrp8    |
| Rpl4     | Rps3    | Rrp9    |
| Rpl5     | Rps3a   | Rrs1    |
| Rpl6     | Rps4x   | Rsad1   |
| Rpl7     | Rps5    | Rsb1    |
| Rpl7a    | Rps6    | Rsb1l   |
| Rpl7l1   | Rps6ka1 | Rsc1a1  |
| Rpl8     | Rps6ka2 | Rsf1    |
| Rpl9     | Rps6ka4 | Rsl1    |
| Rplp0    | Rps6ka5 | Rsl1d1  |
| Rplp1    | Rps6kb1 | Rsl24d1 |
| Rplp2    | Rps6kb2 | Rsph3a  |
| Rpn1     | Rps6kc1 | Rsph3b  |
| Rpn2     | Rps6kl1 | Rsph9   |
| Rpp14    | Rps7    | Rspry1  |
| Rpp21    | Rps8    | Rsrc2   |
| Rpp30    | Rps9    | Rsu1    |
| Rpp38    | Rpsa    | Rtcd1   |
| Rpp40    | Rptor   | Rtel1   |
| Rprd1a   | Rpusd1  | Rtf1    |
| Rprd1b   | Rpusd2  | Rtkn2   |
| Rprd2    | Rpusd3  | Rtn3    |
| Rps10    | Rpusd4  | Rtn4    |
| Rps11    | Rqcd1   | Rtn4ip1 |
| Rps12    | Rrad    | Rtp4    |
| Rps14    | Rraga   | Rttn    |
| Rps15    | Rragb   | Rufy1   |
| Rps15a   | Rragc   | Rufy2   |
| Rps16    | Rragd   | Rufy3   |
| Rps17    | Rras    | Rundc1  |
| Rps18    | Rras2   | Rundc3b |
| Rps19    | Rrbp1   | Runx1   |
| Rps19bp1 | Rreb1   | Ruvbl1  |

|         |         |           |
|---------|---------|-----------|
| Rwdd1   | Sbno1   | Sdr39u1   |
| Rwdd2a  | Sbno2   | Sdr42e1   |
| Rwdd2b  | Sc4mol  | Sec11a    |
| Rwdd3   | Sc5d    | Sec11c    |
| Rwdd4a  | Scaf1   | Sec13     |
| Rxrb    | Scai    | Sec14l1   |
| S100a1  | Scamp2  | Sec16a    |
| S100a10 | Scamp3  | Sec22a    |
| S100a11 | Scamp4  | Sec22b    |
| S100a13 | Scand1  | Sec22c    |
| S100pbp | Scap    | Sec23a    |
| S1pr2   | Scarb1  | Sec23b    |
| S1pr4   | Scarb2  | Sec23ip   |
| Saal1   | Scarf1  | Sec24a    |
| Sac3d1  | Scd2    | Sec24b    |
| Sacm1l  | Scfd1   | Sec24c    |
| Sae1    | Scfd2   | Sec24d    |
| Safb    | Sclt1   | Sec31a    |
| Safb2   | Scly    | Sec61a1   |
| Samd1   | Scmh1   | Sec61a2   |
| Samd10  | Scml4   | Sec61b    |
| Samd8   | Scnm1   | Sec61g    |
| Samd9l  | Sco1    | Sec62     |
| Samm50  | Scpep1  | Sec63     |
| Sap130  | Scrib   | Secisbp2  |
| Sap18   | Scrn2   | Secisbp2l |
| Sap30   | Scrn3   | Seh1l     |
| Sap30bp | Scyl1   | Sel1l     |
| Sap30l  | Scyl2   | Sell      |
| Sar1a   | Scyl3   | Selplg    |
| Sar1b   | Sdad1   | Sema4d    |
| Sars    | Sdcbp   | Sema7a    |
| Sars2   | Sdccag3 | Senp1     |
| Sart1   | Sdccag8 | Senp2     |
| Sart3   | Sdf2    | Senp3     |
| Sash3   | Sdf2l1  | Senp5     |
| Sass6   | Sdf4    | Senp6     |
| Sat1    | Sdha    | Senp7     |
| Satb1   | Sdhaf1  | Senp8     |
| Sav1    | Sdhaf2  | Sephs1    |
| Sbds    | Sdhb    | Sepsecs   |
| Sbf1    | Sdhc    | 40421     |
| Sbk1    | Sdhd    | 40431     |

|           |          |         |
|-----------|----------|---------|
| 40422     | Sf3b4    | Shf     |
| 40426     | Sf3b5    | Shfm1   |
| 40427     | Sfmbt1   | Shisa5  |
| 40429     | Sfpq     | Shkbp1  |
| Serac1    | Sfrs18   | Shmt1   |
| Serbp1    | Sft2d1   | Shoc2   |
| Serf1     | Sft2d2   | Shpk    |
| Serf2     | Sft2d3   | Shprh   |
| Sergef    | Sfxn1    | Shq1    |
| Serhl     | Sfxn2    | Siae    |
| Serinc1   | Sfxn3    | Siah1a  |
| Serinc3   | Sfxn4    | Siah1b  |
| Serinc4   | Sgk3     | Siah2   |
| Serinc5   | Sgol1    | Sidt1   |
| Serp1     | Sgol2    | Sidt2   |
| Serpinb6b | Sgpl1    | Sigirr  |
| Serpinb9  | Sgpp1    | Sigmar1 |
| Serpini1  | Sgsh     | Sik1    |
| Sertad1   | Sgsm2    | Sik2    |
| Sertad2   | Sgsm3    | Sik3    |
| Sertad3   | Sgta     | Sike1   |
| Sesn1     | Sh2b1    | Sil1    |
| Sesn2     | Sh2b3    | Sin3b   |
| Sesn3     | Sh2d1a   | Sip1    |
| Setd1a    | Sh2d2a   | Sipa1   |
| Setd2     | Sh2d3c   | Sipa111 |
| Setd3     | Sh2d5    | Sirt1   |
| Setd4     | Sh3bgrl  | Sirt2   |
| Setd5     | Sh3bgrl3 | Sirt3   |
| Setd6     | Sh3bp1   | Sirt4   |
| Setd7     | Sh3bp2   | Sirt5   |
| Setd8     | Sh3bp5   | Sirt6   |
| Setdb1    | Sh3bp5l  | Sirt7   |
| Setdb2    | Sh3gl1   | Sit1    |
| Setmar    | Sh3glb1  | Siva1   |
| Setx      | Sh3glb2  | Ska1    |
| Sf1       | Sh3kbp1  | Skap1   |
| Sf3a1     | Sh3pxd2a | Ski     |
| Sf3a2     | Sh3rf1   | Skil    |
| Sf3a3     | Sharpin  | Skiv2l  |
| Sf3b1     | Shc1     | Skiv2l2 |
| Sf3b2     | Shc4     | Skp1a   |
| Sf3b3     | Shcbp1   | Skp2    |

|          |          |          |
|----------|----------|----------|
| Sla      | Slc25a24 | Slc33a1  |
| Sla2     | Slc25a25 | Slc35a1  |
| Slain1   | Slc25a26 | Slc35a2  |
| Slain2   | Slc25a27 | Slc35a3  |
| Slamf1   | Slc25a28 | Slc35a4  |
| Slamf6   | Slc25a29 | Slc35a5  |
| Slbp     | Slc25a3  | Slc35b1  |
| Slc10a3  | Slc25a30 | Slc35b2  |
| Slc10a7  | Slc25a32 | Slc35b3  |
| Slc12a4  | Slc25a33 | Slc35b4  |
| Slc12a6  | Slc25a35 | Slc35c1  |
| Slc12a9  | Slc25a36 | Slc35c2  |
| Slc14a1  | Slc25a37 | Slc35d1  |
| Slc16a1  | Slc25a38 | Slc35d2  |
| Slc16a10 | Slc25a39 | Slc35e1  |
| Slc16a13 | Slc25a4  | Slc35e2  |
| Slc16a5  | Slc25a40 | Slc35e3  |
| Slc16a6  | Slc25a42 | Slc35e4  |
| Slc17a5  | Slc25a43 | Slc35f2  |
| Slc18a1  | Slc25a44 | Slc35f5  |
| Slc19a1  | Slc25a45 | Slc36a1  |
| Slc19a2  | Slc25a46 | Slc36a4  |
| Slc1a4   | Slc25a5  | Slc37a1  |
| Slc1a5   | Slc26a11 | Slc37a2  |
| Slc20a1  | Slc26a2  | Slc37a3  |
| Slc20a2  | Slc26a6  | Slc37a4  |
| Slc22a15 | Slc27a1  | Slc38a1  |
| Slc22a5  | Slc27a4  | Slc38a10 |
| Slc23a2  | Slc27a6  | Slc38a2  |
| Slc24a6  | Slc29a1  | Slc38a6  |
| Slc25a1  | Slc29a2  | Slc38a7  |
| Slc25a10 | Slc29a3  | Slc38a9  |
| Slc25a11 | Slc2a1   | Slc39a1  |
| Slc25a12 | Slc2a12  | Slc39a10 |
| Slc25a13 | Slc2a3   | Slc39a11 |
| Slc25a14 | Slc2a4   | Slc39a13 |
| Slc25a15 | Slc30a1  | Slc39a14 |
| Slc25a16 | Slc30a4  | Slc39a3  |
| Slc25a17 | Slc30a5  | Slc39a6  |
| Slc25a19 | Slc30a6  | Slc39a7  |
| Slc25a20 | Slc30a7  | Slc39a8  |
| Slc25a22 | Slc30a9  | Slc39a9  |
| Slc25a23 | Slc31a1  | Slc3a2   |

|          |          |          |
|----------|----------|----------|
| Slc41a1  | Smad3    | Smurf1   |
| Slc41a3  | Smad4    | Smurf2   |
| Slc43a1  | Smad5    | Smyd1    |
| Slc43a2  | Smap1    | Smyd2    |
| Slc43a3  | Smap2    | Smyd3    |
| Slc44a1  | Smarca2  | Smyd4    |
| Slc44a2  | Smarca4  | Smyd5    |
| Slc45a4  | Smarca5  | Snai1    |
| Slc46a1  | Smarcad1 | Snai3    |
| Slc46a3  | Smarcal1 | Snap23   |
| Slc48a1  | Smarcb1  | Snap29   |
| Slc4a1ap | Smarcc1  | Snap47   |
| Slc4a2   | Smarcc2  | Snapc1   |
| Slc4a7   | Smarcd1  | Snapc2   |
| Slc5a3   | Smarcd2  | Snapc3   |
| Slc5a6   | Smarce1  | Snapc4   |
| Slc6a6   | Smc1a    | Snapc5   |
| Slc7a1   | Smc2     | Snapin   |
| Slc7a11  | Smc3     | Snd1     |
| Slc7a5   | Smc4     | Snf8     |
| Slc7a6   | Smc5     | Snip1    |
| Slc7a6os | Smc6     | Snn      |
| Slc9a1   | Smchd1   | Snrk     |
| Slc9a3r1 | Smcr7    | Snrnp200 |
| Slc9a5   | Smcr7l   | Snrnp25  |
| Slc9a6   | Smcr8    | Snrnp27  |
| Slc9a7   | Smek1    | Snrnp35  |
| Slc9a8   | Smek2    | Snrnp40  |
| Slc9a9   | Smg1     | Snrnp48  |
| Slco3a1  | Smg5     | Snrnp70  |
| Slco4a1  | Smg6     | Snrpa    |
| Slfn2    | Smg7     | Snrpa1   |
| Slfn3    | Smn1     | Snrpb    |
| Slfn5    | Smndc1   | Snrpb2   |
| Slfn8    | Smo      | Snrpc    |
| Slfn9    | Smox     | Snrpd1   |
| Slk      | Smpd1    | Snrpd2   |
| Simap    | Smpd2    | Snrpd3   |
| Slmo2    | Smpd4    | Snrpf    |
| Sltm     | Smpdl3a  | Snrpg    |
| Slu7     | Sms      | Snupn    |
| Smad1    | Smtn     | Snw1     |
| Smad2    | Smu1     | Snx1     |

|        |         |         |
|--------|---------|---------|
| Snx10  | Sp3     | Spr     |
| Snx11  | Sp4     | Spred1  |
| Snx12  | Spa17   | Spred2  |
| Snx14  | Spaca1  | Spry1   |
| Snx15  | Spag4   | Spryd3  |
| Snx16  | Spag5   | Spryd4  |
| Snx17  | Spag6   | Spsb2   |
| Snx18  | Spag7   | Spsb3   |
| Snx19  | Spag8   | Sptlc1  |
| Snx2   | Spag9   | Sptlc2  |
| Snx20  | Spast   | Spty2d1 |
| Snx21  | Spata1  | Sqle    |
| Snx25  | Spata2  | Sqrdl   |
| Snx27  | Spata24 | Sqstm1  |
| Snx3   | Spata5  | Sra1    |
| Snx30  | Spata6  | Srd5a1  |
| Snx32  | Spata7  | Srd5a3  |
| Snx33  | Spats1  | Srebf1  |
| Snx4   | Spats2  | Srebf2  |
| Snx5   | Spc24   | Srf     |
| Snx6   | Spc25   | Srfbp1  |
| Snx8   | Spcs1   | Srgap2  |
| Snx9   | Spcs2   | Srgap3  |
| Soat1  | Spef1   | Srl     |
| Socs1  | Spef2   | Srm     |
| Socs3  | Spen    | Srp14   |
| Socs4  | Spg11   | Srp19   |
| Socs5  | Spg20   | Srp54a  |
| Socs7  | Spg21   | Srp68   |
| Sod1   | Spg7    | Srp72   |
| Sod2   | Sphk2   | Srp9    |
| Solh   | Spin1   | Srpk1   |
| Son    | Spin2   | Srpk2   |
| Sorbs1 | Spink10 | Srpr    |
| Sord   | Spint2  | Srprb   |
| Sort1  | Spn     | Srr     |
| Sos1   | Spna2   | Srrd    |
| Sos2   | Spns1   | Srrm1   |
| Sox4   | Spns3   | Srrm2   |
| Sp1    | Spo11   | Srrt    |
| Sp100  | Spop    | Srsf1   |
| Sp110  | Spopl   | Srsf10  |
| Sp140  | Sppl3   | Srsf11  |



|            |          |         |
|------------|----------|---------|
| Srsf12     | Stambp1  | Stradb  |
| Srsf2      | Stap1    | Strap   |
| Srsf3      | Stard10  | Strbp   |
| Srsf4      | Stard3   | Strn    |
| Srsf5      | Stard3nl | Strn3   |
| Srsf6      | Stard4   | Strn4   |
| Srsf7      | Stard5   | Stt3a   |
| Srsf9      | Stard6   | Stt3b   |
| Ss18       | Stard7   | Stub1   |
| Ss18l1     | Stat1    | Stx11   |
| Ssb        | Stat2    | Stx12   |
| Ssbp1      | Stat3    | Stx16   |
| Ssbp2      | Stat4    | Stx17   |
| Ssbp3      | Stat5a   | Stx18   |
| Ssbp4      | Stat5b   | Stx2    |
| Ssfa2      | Stat6    | Stx5a   |
| Ssh2       | Stau1    | Stx6    |
| Ssna1      | Stil     | Stx7    |
| Ssr1       | Stim1    | Stx8    |
| Ssr2       | Stim2    | Stxbp1  |
| Ssr3       | Stip1    | Stxbp2  |
| Ssr4       | Stk10    | Stxbp3a |
| Ssrp1      | Stk11    | Stxbp4  |
| Sssca1     | Stk11ip  | Stxbp5  |
| Ssu72      | Stk16    | Styx    |
| Ssx2ip     | Stk17b   | Styx11  |
| St13       | Stk19    | Sub1    |
| St3gal1    | Stk24    | Sucla2  |
| St3gal3    | Stk25    | Suclg1  |
| St3gal4    | Stk3     | Suclg2  |
| St3gal5    | Stk30    | Suds3   |
| St6gal1    | Stk35    | Sufu    |
| St6galnac3 | Stk36    | Sugp1   |
| St6galnac4 | Stk38    | Sugp2   |
| St7        | Stk38l   | Sugt1   |
| St7l       | Stk4     | Sumf1   |
| St8sia1    | Stk40    | Sumf2   |
| St8sia4    | Stmn1    | Sumo1   |
| Stag2      | Stom     | Sumo2   |
| Stag3      | Stoml1   | Sumo3   |
| Stam       | Stoml2   | Sun1    |
| Stam2      | Ston1    | Sun2    |
| Stambp     | Stra13   | Suox    |

|          |        |          |
|----------|--------|----------|
| Supt16h  | Tab2   | Tardbp   |
| Supt3h   | Tab3   | Tars     |
| Supt4h1  | Tac4   | Tars2    |
| Supt5h   | Tacc1  | Tarsl2   |
| Supt6h   | Tacc3  | Tas1r1   |
| Supt7l   | Taco1  | Tasp1    |
| Supv3l1  | Tada1  | Tatdn1   |
| Surf1    | Tada2a | Tatdn2   |
| Surf2    | Tada2b | Tatdn3   |
| Surf4    | Tada3  | Tax1bp1  |
| Surf6    | Taf1   | Tax1bp3  |
| Susd1    | Taf10  | Taz      |
| Susd3    | Taf11  | Tbc1d10a |
| Suv39h1  | Taf12  | Tbc1d10b |
| Suv39h2  | Taf13  | Tbc1d10c |
| Suv420h1 | Taf15  | Tbc1d13  |
| Suv420h2 | Taf1b  | Tbc1d15  |
| Suz12    | Taf1c  | Tbc1d17  |
| Sv2a     | Taf1d  | Tbc1d19  |
| Svil     | Taf2   | Tbc1d2   |
| Swap70   | Taf3   | Tbc1d20  |
| Syap1    | Taf4a  | Tbc1d22a |
| Syce2    | Taf5   | Tbc1d22b |
| Syde1    | Taf5l  | Tbc1d23  |
| Syde2    | Taf6   | Tbc1d25  |
| Syf2     | Taf6l  | Tbc1d2b  |
| Sympk    | Taf7   | Tbc1d5   |
| Syn3     | Taf8   | Tbc1d7   |
| Syncrip  | Taf9   | Tbc1d8   |
| Syngr1   | Taf9b  | Tbc1d8b  |
| Syngr2   | Tagap1 | Tbc1d9b  |
| Syngr4   | Tagln2 | Tbca     |
| Synj1    | Taldo1 | Tbcb     |
| Synj2    | Tanc1  | Tbcc     |
| Synj2bp  | Taok1  | Tbccd1   |
| Synrg    | Taok2  | Tbcd     |
| Sypl     | Taok3  | Tbce     |
| Syt11    | Tap1   | Tbck     |
| Syt13    | Tap2   | Tbk1     |
| Sytl1    | Tapbp  | Tbl1x    |
| Syvn1    | Tapbpl | Tbl1xr1  |
| Szt2     | Tapt1  | Tbl2     |
| Tab1     | Tarbp2 | Tbl3     |

|          |          |          |
|----------|----------|----------|
| Tbp      | Terf1    | Thap3    |
| Tbpl1    | Terf2    | Thap4    |
| Tbrg1    | Terf2ip  | Thap7    |
| Tbrg4    | Tert     | Thbs3    |
| Tbxa2r   | Tes      | Them4    |
| Tcea1    | Tesk1    | Themis   |
| Tcea2    | Tesk2    | Thg1l    |
| Tceb1    | Tet1     | Thnsl1   |
| Tceb2    | Tex10    | Thnsl2   |
| Tceb3    | Tex14    | Thoc1    |
| Tcerg1   | Tex15    | Thoc3    |
| Tcf12    | Tex2     | Thoc5    |
| Tcf19    | Tex22    | Thoc6    |
| Tcf25    | Tex261   | Thoc7    |
| Tcf3     | Tex264   | Thop1    |
| Tcf4     | Tex9     | Thra     |
| Tcf7     | Tfam     | Thrap3   |
| Tcf7l2   | Tfb1m    | Thsd1    |
| Tchp     | Tfb2m    | Thtpa    |
| Tcirg1   | Tfdp1    | Thumpd1  |
| Tcn2     | Tfdp2    | Thumpd2  |
| Tcof1    | Tfg      | Thumpd3  |
| Tcp1     | Tfip11   | Thy1     |
| Tcp11    | Tfpt     | Thyn1    |
| Tcp11l2  | Tfrc     | Tia1     |
| Tcta     | Tgds     | Tial1    |
| Tctex1d1 | Tgfb1    | Ticam1   |
| Tctex1d2 | Tgfb3    | Ticam2   |
| Tctn1    | Tgfbr1   | Tifab    |
| Tctn3    | Tgfbr2   | Tigd2    |
| Tdg      | Tgfbr3   | Tigd3    |
| Tdp1     | Tgfbrap1 | Tigd4    |
| Tdp2     | Tgif1    | Timeless |
| Tdrd3    | Tgif2    | Timm10   |
| Tdrd5    | Tgoln1   | Timm13   |
| Tdrkh    | Tgoln2   | Timm17a  |
| Tec      | Tgs1     | Timm17b  |
| Tecpr1   | Th1l     | Timm22   |
| Tecpr2   | Tha1     | Timm23   |
| Tecr     | Thada    | Timm44   |
| Telo2    | Thap1    | Timm50   |
| Tenc1    | Thap11   | Timm8a1  |
| Tep1     | Thap2    | Timm8b   |

|        |          |          |
|--------|----------|----------|
| Timm9  | Tmco7    | Tmem160  |
| Timp2  | Tmed1    | Tmem161a |
| Tinf2  | Tmed10   | Tmem161b |
| Tiparp | Tmed2    | Tmem164  |
| Tipin  | Tmed3    | Tmem165  |
| Tiprl  | Tmed4    | Tmem167  |
| Tirap  | Tmed5    | Tmem167b |
| Tjap1  | Tmed7    | Tmem168  |
| Tjp3   | Tmed8    | Tmem17   |
| Tk1    | Tmed9    | Tmem170  |
| Tk2    | Tmem101  | Tmem175  |
| Tkt    | Tmem104  | Tmem176a |
| Tlcd1  | Tmem106a | Tmem176b |
| Tlcd2  | Tmem106b | Tmem177  |
| Tle1   | Tmem106c | Tmem179b |
| Tle2   | Tmem107  | Tmem18   |
| Tle3   | Tmem109  | Tmem180  |
| Tle4   | Tmem11   | Tmem183a |
| Tle6   | Tmem110  | Tmem184b |
| Tlk1   | Tmem111  | Tmem184c |
| Tlk2   | Tmem115  | Tmem185b |
| Tln1   | Tmem116  | Tmem186  |
| Tlr12  | Tmem120a | Tmem188  |
| Tlr2   | Tmem121  | Tmem189  |
| Tlr6   | Tmem123  | Tmem19   |
| Tm2d1  | Tmem126a | Tmem191c |
| Tm2d2  | Tmem126b | Tmem192  |
| Tm2d3  | Tmem127  | Tmem194  |
| Tm6sf1 | Tmem128  | Tmem194b |
| Tm7sf2 | Tmem129  | Tmem199  |
| Tm7sf3 | Tmem131  | Tmem20   |
| Tm9sf1 | Tmem134  | Tmem201  |
| Tm9sf2 | Tmem138  | Tmem203  |
| Tm9sf3 | Tmem139  | Tmem205  |
| Tm9sf4 | Tmem140  | Tmem206  |
| Tmbim6 | Tmem143  | Tmem208  |
| Tmc6   | Tmem144  | Tmem209  |
| Tmc8   | Tmem147  | Tmem214  |
| Tmcc1  | Tmem149  | Tmem216  |
| Tmco1  | Tmem14a  | Tmem218  |
| Tmco3  | Tmem14c  | Tmem220  |
| Tmco4  | Tmem151b | Tmem221  |
| Tmco6  | Tmem154  | Tmem222  |

|          |           |          |
|----------|-----------|----------|
| Tmem223  | Tmem9     | Tnk2     |
| Tmem229b | Tmem93    | Tnks     |
| Tmem231  | Tmem97    | Tnks1bp1 |
| Tmem29   | Tmem9b    | Tnks2    |
| Tmem30a  | Tmf1      | Tnnc1    |
| Tmem33   | Tmod3     | Tnni3    |
| Tmem35   | Tmpo      | Tnp2     |
| Tmem38a  | Tmsb10    | Tnpo1    |
| Tmem38b  | Tmsb15b1  | Tnpo2    |
| Tmem39a  | Tmsb4x    | Tnpo3    |
| Tmem39b  | Tmtc2     | Tnrc6a   |
| Tmem41a  | Tmtc3     | Tnrc6b   |
| Tmem41b  | Tmtc4     | Tnrc6c   |
| Tmem42   | Tmub1     | Tns3     |
| Tmem43   | Tmub2     | Tob1     |
| Tmem48   | Tmx1      | Tob2     |
| Tmem5    | Tmx2      | Toe1     |
| Tmem50a  | Tmx3      | Tom112   |
| Tmem50b  | Tmx4      | Tomm20   |
| Tmem55a  | Tnf       | Tomm22   |
| Tmem55b  | Tnfaip1   | Tomm34   |
| Tmem57   | Tnfaip3   | Tomm40   |
| Tmem59   | Tnfaip8   | Tomm40l  |
| Tmem60   | Tnfaip8l1 | Tomm5    |
| Tmem62   | Tnfaip8l2 | Tomm6    |
| Tmem63a  | Tnfrsf10b | Tomm7    |
| Tmem63b  | Tnfrsf14  | Tomm70a  |
| Tmem64   | Tnfrsf18  | Tomt     |
| Tmem65   | Tnfrsf19  | Top1     |
| Tmem66   | Tnfrsf1a  | Top1mt   |
| Tmem67   | Tnfrsf1b  | Top2a    |
| Tmem68   | Tnfrsf21  | Top2b    |
| Tmem69   | Tnfrsf22  | Top3a    |
| Tmem70   | Tnfrsf23  | Top3b    |
| Tmem71   | Tnfrsf26  | Topbp1   |
| Tmem79   | Tnfrsf8   | Topors   |
| Tmem80   | Tnfrsf9   | Tor1a    |
| Tmem85   | Tnfsf10   | Tor1aip1 |
| Tmem86a  | Tnfsf11   | Tor1aip2 |
| Tmem87a  | Tnfsf14   | Tor1b    |
| Tmem87b  | Tnfsf9    | Tor2a    |
| Tmem88   | Tnik      | Tor3a    |
| Tmem8b   | Tnip2     | Tox      |

|          |          |           |
|----------|----------|-----------|
| Tox4     | Trappc4  | Trip12    |
| Tpcn1    | Trappc5  | Trip13    |
| Tpcn2    | Trappc6a | Trip4     |
| Tpd52    | Trappc6b | Trit1     |
| Tpd52l2  | Trappc9  | Trmt1     |
| Tpi1     | Trat1    | Trmt11    |
| Tpk1     | Trdmt1   | Trmt112   |
| Tpm4     | Trem12   | Trmt12    |
| Tpmt     | Trerf1   | Trmt2a    |
| Tpp1     | Trex1    | Trmt2b    |
| Tpp2     | Triap1   | Trmt5     |
| Tpr      | Trib1    | Trmt6     |
| Tpra1    | Trib2    | Trmt61a   |
| Tprgl    | Trib3    | Trmu      |
| Tprkb    | Trim11   | Trnau1ap  |
| Tprn     | Trim13   | Trnt1     |
| Tpst2    | Trim14   | Troap     |
| Tpt1     | Trim16   | Trove2    |
| Tpx2     | Trim17   | Trp53     |
| Tra2a    | Trim21   | Trp53bp1  |
| Tra2b    | Trim23   | Trp53bp2  |
| Tradd    | Trim24   | Trp53i11  |
| Traf1    | Trim25   | Trp53i13  |
| Traf2    | Trim26   | Trp53inp1 |
| Traf3    | Trim27   | Trp53inp2 |
| Traf3ip1 | Trim28   | Trp53rk   |
| Traf3ip2 | Trim32   | Trpc2     |
| Traf3ip3 | Trim33   | Trpc4ap   |
| Traf4    | Trim35   | Trpm7     |
| Traf5    | Trim37   | Trps1     |
| Traf6    | Trim39   | Trpt1     |
| Traf7    | Trim41   | Trpv2     |
| Trafd1   | Trim45   | Trrap     |
| Trak1    | Trim46   | Trub1     |
| Trak2    | Trim56   | Trub2     |
| Tram1    | Trim59   | Tsc1      |
| Tram2    | Trim6    | Tsc2      |
| Trap1    | Trim62   | Tsc22d1   |
| Trappc1  | Trim65   | Tsc22d2   |
| Trappc10 | Trim68   | Tsc22d4   |
| Trappc2  | Trim8    | Tsen15    |
| Trappc2l | Trip10   | Tsen2     |
| Trappc3  | Trip11   | Tsen34    |

|          |         |         |
|----------|---------|---------|
| Tsen54   | Ttc23   | Tubgcp3 |
| Tsfm     | Ttc25   | Tubgcp4 |
| Tsg101   | Ttc26   | Tubgcp5 |
| Tsga10   | Ttc27   | Tubgcp6 |
| Tsga14   | Ttc3    | Tufm    |
| Tshz1    | Ttc30a1 | Tuft1   |
| Tslp     | Ttc30b  | Tulp2   |
| Tsn      | Ttc32   | Tulp3   |
| Tsnax    | Ttc33   | Tulp4   |
| Tsnaxip1 | Ttc35   | Tusc1   |
| Tspan13  | Ttc37   | Tusc2   |
| Tspan14  | Ttc38   | Tusc3   |
| Tspan2   | Ttc39d  | Tut1    |
| Tspan3   | Ttc4    | Twf1    |
| Tspan31  | Ttc5    | Twf2    |
| Tspan32  | Ttc7    | Twistnb |
| Tspan5   | Ttc7b   | Twsg1   |
| Tspan6   | Ttc9c   | Txk     |
| Tspo     | Ttf1    | Txlna   |
| Tspyl1   | Ttf2    | Txlnb   |
| Tspyl2   | Tti1    | Txlng   |
| Tspyl3   | Ttk     | Txn1    |
| Tspyl4   | Ttl     | Txn2    |
| Tsr1     | Ttl1    | Txndc11 |
| Tsr2     | Ttl12   | Txndc12 |
| Tssc1    | Ttl13   | Txndc15 |
| Tssc4    | Ttl4    | Txndc16 |
| Tssk1    | Ttl5    | Txndc17 |
| Tssk6    | Ttpal   | Txndc5  |
| Tst      | Ttyh3   | Txndc9  |
| Tsta3    | Tuba1a  | Txnip   |
| Tstd2    | Tuba1b  | Txnl1   |
| Ttbk2    | Tuba1c  | Txnl4a  |
| Ttc1     | Tuba4a  | Txnl4b  |
| Ttc12    | Tuba8   | Txnrd2  |
| Ttc13    | Tubb2a  | Tyk2    |
| Ttc14    | Tubb2b  | Tymp    |
| Ttc15    | Tubb5   | Tyms    |
| Ttc16    | Tubd1   | Tysnd1  |
| Ttc17    | Tube1   | Tyw1    |
| Ttc19    | Tubg1   | Tyw3    |
| Ttc21a   | Tubg2   | U2af1   |
| Ttc21b   | Tubgcp2 | U2af1l4 |

|         |        |           |
|---------|--------|-----------|
| U2af2   | Ube2t  | Uck2      |
| Uaca    | Ube2v1 | Uckl1     |
| Uap1    | Ube2v2 | Ucp2      |
| Uap1l1  | Ube2w  | Uevld     |
| Uba1    | Ube2z  | Ufc1      |
| Uba2    | Ube3a  | Ufd1l     |
| Uba3    | Ube3b  | Ufm1      |
| Uba5    | Ube3c  | Ufsp2     |
| Uba52   | Ube4a  | Ugcg      |
| Uba6    | Ube4b  | Ugdh      |
| Uba7    | Ubfd1  | Uggt1     |
| Ubac1   | Ubiad1 | Ugp2      |
| Ubac2   | Ubl3   | Uhmk1     |
| Ubap1   | Ubl4   | Uhrf1     |
| Ubap2   | Ubl5   | Uhrf1bp1l |
| Ubap2l  | Ubl7   | Uhrf2     |
| Ubash3a | Ublcp1 | Uimc1     |
| Ubb     | Ubn1   | Ulk1      |
| Ubc     | Ubn2   | Ulk2      |
| Ube2a   | Ubox5  | Ulk3      |
| Ube2b   | Ubp1   | Ulk4      |
| Ube2c   | Ubqln1 | Umps      |
| Ube2cbp | Ubqln2 | Unc119    |
| Ube2d1  | Ubqln4 | Unc119b   |
| Ube2d3  | Ubr1   | Unc13d    |
| Ube2e1  | Ubr2   | Unc45a    |
| Ube2e2  | Ubr3   | Unc45b    |
| Ube2e3  | Ubr4   | Unc50     |
| Ube2g1  | Ubr7   | Unc93b1   |
| Ube2g2  | Ubsd1  | Ung       |
| Ube2h   | Ubsd2  | Unk       |
| Ube2i   | Ubtf   | Unkl      |
| Ube2j1  | Ubxn1  | Upf1      |
| Ube2j2  | Ubxn11 | Upf2      |
| Ube2k   | Ubxn2a | Upf3a     |
| Ube2l3  | Ubxn2b | Upf3b     |
| Ube2l6  | Ubxn4  | Uprt      |
| Ube2m   | Ubxn6  | Uqcc      |
| Ube2o   | Ubxn7  | Uqcr10    |
| Ube2q1  | Ubxn8  | Uqcr11    |
| Ube2q2  | Uchl3  | Uqcrb     |
| Ube2r2  | Uchl5  | Uqcrc1    |
| Ube2s   | Uck1   | Uqcrc2    |



|         |        |          |
|---------|--------|----------|
| Uqcrfs1 | Usp47  | Vdac1    |
| Uqcrh   | Usp48  | Vdac2    |
| Uqcrq   | Usp49  | Vdac3    |
| Urb1    | Usp5   | Vegfa    |
| Urb2    | Usp53  | Vegfb    |
| Urgcp   | Usp6nl | VeZF1    |
| Urm1    | Usp8   | VeZt     |
| Urod    | Usp9x  | Vhl      |
| Uros    | Usp11  | Vim      |
| Use1    | Utp11l | Vipar    |
| Usf1    | Utp14a | Vipr2    |
| Ushbp1  | Utp14b | Vkorc1   |
| Usmg5   | Utp15  | Vkorc11l |
| Uso1    | Utp18  | Vmac     |
| Usp1    | Utp20  | Vopp1    |
| Usp10   | Utp23  | Vprbp    |
| Usp11   | Utp3   | Vpreb1   |
| Usp12   | Utp6   | Vps11    |
| Usp15   | Uvrag  | Vps13a   |
| Usp16   | Uxs1   | Vps13c   |
| Usp18   | Uxt    | Vps13d   |
| Usp19   | Vac14  | Vps16    |
| Usp2    | Vamp1  | Vps18    |
| Usp20   | Vamp2  | Vps26a   |
| Usp21   | Vamp3  | Vps26b   |
| Usp22   | Vamp4  | Vps28    |
| Usp24   | Vamp5  | Vps29    |
| Usp25   | Vamp8  | Vps33a   |
| Usp27x  | Vangl2 | Vps33b   |
| Usp28   | Vapa   | Vps35    |
| Usp3    | Vapb   | Vps36    |
| Usp30   | Vars   | Vps37a   |
| Usp32   | Vars2  | Vps37b   |
| Usp33   | Vash1  | Vps37c   |
| Usp34   | Vasp   | Vps39    |
| Usp36   | Vat1   | Vps41    |
| Usp38   | Vav1   | Vps45    |
| Usp39   | Vav2   | Vps4a    |
| Usp4    | Vav3   | Vps4b    |
| Usp40   | Vbp1   | Vps52    |
| Usp42   | Vcl    | Vps53    |
| Usp44   | Vcp    | Vps54    |
| Usp46   | Vcpip1 | Vps72    |

|         |         |         |
|---------|---------|---------|
| Vps8    | Wdr37   | Whsc1   |
| Vrk1    | Wdr4    | Whsc111 |
| Vrk2    | Wdr41   | Whsc2   |
| Vrk3    | Wdr43   | Wibg    |
| Vta1    | Wdr44   | Wipf2   |
| Vti1a   | Wdr45   | Wipi1   |
| Vti1b   | Wdr45l  | Wipi2   |
| Vwa5a   | Wdr46   | Wiz     |
| Vwce    | Wdr47   | Wls     |
| Wac     | Wdr48   | Wnk1    |
| Wapal   | Wdr5    | Wnt5b   |
| Wars    | Wdr53   | Wrap53  |
| Wars2   | Wdr55   | Wrb     |
| Was     | Wdr59   | Wrn     |
| Wasf2   | Wdr5b   | Wrnip1  |
| Wasl    | Wdr6    | Wsb1    |
| Wbp1    | Wdr60   | Wsb2    |
| Wbp11   | Wdr61   | Wtap    |
| Wbp2    | Wdr62   | Wwox    |
| Wbp4    | Wdr67   | Wwp1    |
| Wbp5    | Wdr7    | Wwp2    |
| Wbp7    | Wdr70   | Xab2    |
| Wbscr16 | Wdr73   | Xaf1    |
| Wbscr22 | Wdr74   | Xbp1    |
| Wbscr27 | Wdr75   | Xk      |
| Wdfy1   | Wdr76   | Xkr5    |
| Wdfy2   | Wdr77   | Xkr8    |
| Wdhd1   | Wdr78   | Xkrx    |
| Wdr1    | Wdr81   | Xlr4a   |
| Wdr11   | Wdr82   | Xlr4b   |
| Wdr12   | Wdr83   | Xlr4c   |
| Wdr13   | Wdr85   | Xpa     |
| Wdr18   | Wdr89   | Xpc     |
| Wdr19   | Wdr90   | Xpnpep1 |
| Wdr20a  | Wdr91   | Xpnpep3 |
| Wdr24   | Wdr93   | Xpo1    |
| Wdr26   | Wdsub1  | Xpo4    |
| Wdr27   | Wdyhv1  | Xpo5    |
| Wdr3    | Wee1    | Xpo6    |
| Wdr31   | Wfikkn1 | Xpo7    |
| Wdr33   | Wfs1    | Xpot    |
| Wdr34   | Whamm   | Xpr1    |
| Wdr35   | Whrn    | Xrcc1   |

|          |         |          |
|----------|---------|----------|
| Xrcc2    | Ywhah   | Zc3h15   |
| Xrcc3    | Ywhaq   | Zc3h18   |
| Xrcc4    | Ywhaz   | Zc3h3    |
| Xrcc5    | Yy1     | Zc3h4    |
| Xrcc6    | Yy2     | Zc3h6    |
| Xrcc6bp1 | Zadh2   | Zc3h7a   |
| Xrn1     | Zap70   | Zc3h7b   |
| Xrn2     | Zbed3   | Zc3h8    |
| Xrra1    | Zbed4   | Zc3hav1  |
| Xylb     | Zbp1    | Zc3hav1l |
| Xylt1    | Zbtb1   | Zc3hc1   |
| Xylt2    | Zbtb12  | Zc4h2    |
| Yaf2     | Zbtb17  | Zcchc10  |
| Yars     | Zbtb2   | Zcchc11  |
| Yars2    | Zbtb20  | Zcchc17  |
| Ybx1     | Zbtb22  | Zcchc18  |
| Ybx2     | Zbtb24  | Zcchc2   |
| Ydjc     | Zbtb25  | Zcchc6   |
| Yeats2   | Zbtb26  | Zcchc7   |
| Yeats4   | Zbtb3   | Zcchc8   |
| Yif1a    | Zbtb33  | Zcchc9   |
| Yif1b    | Zbtb34  | Zcrb1    |
| Yipf1    | Zbtb37  | Zcwpw1   |
| Yipf2    | Zbtb39  | Zdhhc12  |
| Yipf3    | Zbtb4   | Zdhhc13  |
| Yipf4    | Zbtb40  | Zdhhc14  |
| Yipf5    | Zbtb41  | Zdhhc15  |
| Yipf6    | Zbtb43  | Zdhhc16  |
| Ykt6     | Zbtb44  | Zdhhc17  |
| Yme1l1   | Zbtb45  | Zdhhc20  |
| Yod1     | Zbtb48  | Zdhhc21  |
| Ypel1    | Zbtb49  | Zdhhc23  |
| Ypel2    | Zbtb5   | Zdhhc24  |
| Ypel3    | Zbtb6   | Zdhhc3   |
| Ypel5    | Zbtb8os | Zdhhc4   |
| Yrdc     | Zbtb9   | Zdhhc5   |
| Ythdc1   | Zc3h10  | Zdhhc6   |
| Ythdf1   | Zc3h11a | Zdhhc7   |
| Ythdf2   | Zc3h12a | Zdhhc8   |
| Ythdf3   | Zc3h12b | Zdhhc9   |
| Ywhab    | Zc3h12d | Zeb1     |
| Ywhae    | Zc3h13  | Zer1     |
| Ywhag    | Zc3h14  | Zfand1   |

|         |         |         |
|---------|---------|---------|
| Zfand2a | Zfp207  | Zfp358  |
| Zfand2b | Zfp212  | Zfp36   |
| Zfand3  | Zfp213  | Zfp362  |
| Zfand5  | Zfp219  | Zfp365  |
| Zfand6  | Zfp229  | Zfp367  |
| Zfat    | Zfp235  | Zfp369  |
| Zfc3h1  | Zfp238  | Zfp3611 |
| Zfhx2   | Zfp239  | Zfp3612 |
| Zfml    | Zfp248  | Zfp382  |
| Zfp1    | Zfp251  | Zfp384  |
| Zfp101  | Zfp259  | Zfp385a |
| Zfp106  | Zfp26   | Zfp386  |
| Zfp108  | Zfp260  | Zfp39   |
| Zfp109  | Zfp263  | Zfp397  |
| Zfp11   | Zfp27   | Zfp398  |
| Zfp110  | Zfp273  | Zfp40   |
| Zfp113  | Zfp275  | Zfp407  |
| Zfp114  | Zfp276  | Zfp408  |
| Zfp12   | Zfp28   | Zfp41   |
| Zfp120  | Zfp280b | Zfp410  |
| Zfp128  | Zfp280c | Zfp414  |
| Zfp13   | Zfp280d | Zfp418  |
| Zfp14   | Zfp281  | Zfp420  |
| Zfp142  | Zfp282  | Zfp422  |
| Zfp143  | Zfp286  | Zfp426  |
| Zfp146  | Zfp287  | Zfp429  |
| Zfp148  | Zfp292  | Zfp438  |
| Zfp157  | Zfp295  | Zfp444  |
| Zfp160  | Zfp3    | Zfp445  |
| Zfp161  | Zfp30   | Zfp446  |
| Zfp167  | Zfp300  | Zfp449  |
| Zfp169  | Zfp317  | Zfp451  |
| Zfp174  | Zfp319  | Zfp455  |
| Zfp180  | Zfp322a | Zfp456  |
| Zfp182  | Zfp324  | Zfp457  |
| Zfp184  | Zfp326  | Zfp458  |
| Zfp185  | Zfp329  | Zfp46   |
| Zfp187  | Zfp330  | Zfp472  |
| Zfp189  | Zfp335  | Zfp473  |
| Zfp191  | Zfp341  | Zfp498  |
| Zfp192  | Zfp346  | Zfp507  |
| Zfp2    | Zfp35   | Zfp51   |
| Zfp202  | Zfp354c | Zfp512  |

|        |           |           |
|--------|-----------|-----------|
| Zfp513 | Zfp653    | Zfp787    |
| Zfp52  | Zfp655    | Zfp788    |
| Zfp523 | Zfp658    | Zfp790    |
| Zfp524 | Zfp661    | Zfp800    |
| Zfp526 | Zfp664    | Zfp809    |
| Zfp53  | Zfp667    | Zfp81     |
| Zfp54  | Zfp668    | Zfp810    |
| Zfp551 | Zfp672    | Zfp82     |
| Zfp553 | Zfp677    | Zfp820    |
| Zfp560 | Zfp68     | Zfp825    |
| Zfp563 | Zfp687    | Zfp828    |
| Zfp566 | Zfp689    | Zfp830    |
| Zfp568 | Zfp69     | Zfp84     |
| Zfp574 | Zfp691    | Zfp846    |
| Zfp579 | Zfp7      | Zfp85-rs1 |
| Zfp58  | Zfp704    | Zfp866    |
| Zfp583 | Zfp706    | Zfp867    |
| Zfp592 | Zfp707    | Zfp868    |
| Zfp593 | Zfp71-rs1 | Zfp869    |
| Zfp595 | Zfp710    | Zfp87     |
| Zfp597 | Zfp715    | Zfp871    |
| Zfp598 | Zfp719    | Zfp90     |
| Zfp599 | Zfp738    | Zfp91     |
| Zfp60  | Zfp74     | Zfp93     |
| Zfp605 | Zfp740    | Zfp94     |
| Zfp606 | Zfp746    | Zfp1      |
| Zfp607 | Zfp747    | Zfpm1     |
| Zfp609 | Zfp748    | Zfr       |
| Zfp61  | Zfp758    | Zfr2      |
| Zfp617 | Zfp759    | Zfx       |
| Zfp619 | Zfp760    | Zfyve1    |
| Zfp62  | Zfp763    | Zfyve16   |
| Zfp622 | Zfp764    | Zfyve19   |
| Zfp623 | Zfp768    | Zfyve20   |
| Zfp628 | Zfp770    | Zfyve21   |
| Zfp629 | Zfp771    | Zfyve26   |
| Zfp637 | Zfp772    | Zfyve27   |
| Zfp639 | Zfp773    | Zglp1     |
| Zfp64  | Zfp777    | Zgpat     |
| Zfp644 | Zfp78     | Zhx1      |
| Zfp646 | Zfp780b   | Zhx2      |
| Zfp647 | Zfp784    | Zhx3      |
| Zfp652 | Zfp786    | Zik1      |

|          |        |
|----------|--------|
| Zkscan1  | Zswim1 |
| Zkscan14 | Zswim3 |
| Zkscan3  | Zswim4 |
| Zkscan5  | Zswim7 |
| Zkscan6  | Zufsp  |
| Zmat2    | Zw10   |
| Zmat3    | Zwilch |
| Zmat5    | Zwint  |
| Zmiz1    | Zxdc   |
| Zmiz2    | Zyg11b |
| Zmpste24 | Zyx    |
| Zmym1    | Zzef1  |
| Zmym2    | Zzz3   |
| Zmym3    |        |
| Zmym4    |        |
| Zmym5    |        |
| Zmym6    |        |
| Zmynd11  |        |
| Zmynd19  |        |
| Znf512b  |        |
| Znfx1    |        |
| Znhit1   |        |
| Znhit3   |        |
| Znhit6   |        |
| Znrd1    |        |
| Znrd1as  |        |
| Znrf1    |        |
| Znrf2    |        |
| Znrf3    |        |
| Zpbp     |        |
| Zpbp2    |        |
| Zranb1   |        |
| Zranb2   |        |
| Zranb3   |        |
| Zrsr1    |        |
| Zrsr2    |        |
| Zscan10  |        |
| Zscan12  |        |
| Zscan2   |        |
| Zscan20  |        |
| Zscan21  |        |
| Zscan22  |        |
| Zscan29  |        |

**H3K4me3<sup>lo</sup>**  
**H3K27me3<sup>hi</sup>**

0610040J01Rik  
1300002K09Rik  
1700001C19Rik  
1700011F03Rik  
1700106J16Rik  
1810019J16Rik  
1810041L15Rik  
2010001M09Rik  
2410004A20Rik  
2610034B18Rik  
2900026A02Rik  
5330417C22Rik  
6030429G01Rik  
6330403A02Rik  
6330403K07Rik  
9030418K01Rik  
9030425E11Rik  
9930013L23Rik  
A430110N23Rik  
A730011L01Rik  
Abcc3  
Abcg4  
Ablim1  
Acaa1b  
Accn2  
Accn4  
Ache  
Acox1  
Acsl6  
Acta1  
Actl7b  
Acvrl1  
Acyp1  
Adam11  
Adam19  
Adam22  
Adamts8  
Adamtsl4  
Adcy1  
Adcy5

Adra1d  
Adra2a  
Aebp1  
Afap1l2  
Ahr  
Al464131  
Al646023  
Al661453  
Aif1l  
Aifm2  
Ak5  
Aldh1l2  
Alk  
Alox12  
Alox15  
Alox5  
Alox8  
Alpl  
Amh  
Amn  
Amotl1  
Amph  
Ankrd53  
Apln  
Aqp3  
Arfip1  
Arhgap29  
Arhgap6  
Arhgdig  
Arhgef7  
Arid3c  
Arntl2  
Arx  
Asb8  
Asphd1  
Asphd2  
Atp1a3  
Atp2c1  
Atp2c2  
Atp6v0a1  
Atp8b1  
Atp8b3  
AU021092

AU023871  
B230312A22Rik  
B3gat2  
B4galnt2  
B4galnt4  
B4galt2  
Bace2  
Baiap2l1  
Barhl1  
BC005764  
BC030476  
BC055111  
BC061194  
Bcam  
Bcl3  
Bcl6b  
Best2  
Bhlha9  
Bin1  
Bmp6  
Bmp8b  
Bok  
Brsk1  
C1qa  
C1qc  
C1ql1  
C1qtnf4  
C530008M17Rik  
Cacna1e  
Cacna2d2  
Cacna2d4  
Cacnb4  
Calcb  
Caly  
Camk2b  
Car15  
Casz1  
Ccdc106  
Ccdc13  
Ccdc37  
Ccdc64b  
Ccdc65  
Ccdc85a

|          |             |               |
|----------|-------------|---------------|
| Ccnd1    | Col12a1     | Ddit4l        |
| Ccr10    | Col14a1     | Ddn           |
| Ccrl2    | Col15a1     | Ddr1          |
| Cd164l2  | Col18a1     | Des           |
| Cd248    | Col1a1      | Dgkz          |
| Cd300a   | Col2a1      | Dhh           |
| Cd302    | Col7a1      | Diras2        |
| Cd40     | Col8a2      | Disc1         |
| Cd63     | Comp        | Dkk1          |
| Cd83     | Coro6       | Dlg3          |
| Cdc42bpb | Cpeb1       | Dlgap2        |
| Cdh11    | Cplx2       | Dlgap3        |
| Cdh20    | Cpne5       | Dlk1          |
| Cdh3     | Cpne9       | Dll3          |
| Cdhr1    | Cpxm1       | Dll4          |
| Cdkn1a   | Crabp1      | Dmc1          |
| Cdkn1c   | Crabp2      | Dmd           |
| Cdo1     | Crb2        | Dmpk          |
| Celf3    | Creb3l1     | Dmrta2        |
| Celf4    | Crispld2    | Dnahc11       |
| Celf5    | Crlf1       | Dnajb8        |
| Cerkl    | Crmp1       | Doc2a         |
| Cgnl1    | Cryaa       | Doc2b         |
| Cgref1   | Csf1r       | Dock1         |
| Chad     | Cspg4       | Dpcr1         |
| Chd5     | Ctnnd1      | Dpf1          |
| Chga     | Ctnnd2      | Dsg2          |
| Chmp4c   | Ctsh        | Duox1         |
| Chrm3    | Cxcl12      | Duox2         |
| Chrn2    | Cxcl16      | Dusp3         |
| Chst9    | Cyp17a1     | Dusp9         |
| Cideb    | Cyp26a1     | Duxbl         |
| Cilp2    | Cyp26b1     | Dysf          |
| Ciz1     | Cyp27a1     | Dzip1l        |
| Cldn3    | Cyp27b1     | E130203B14Rik |
| Clec2l   | Cys1        | Ebf1          |
| Clmn     | D16H22S680E | Echdc2        |
| Cmklr1   | Daam2       | Efcab4a       |
| Cnih2    | Dagla       | Efnb3         |
| Cnn1     | Dbn1        | Egf           |
| Cntn2    | Dbn2        | Egfl6         |
| Coch     | Dbx2        | Elfn1         |
| Col11a2  | Dcxr        | Elfn2         |



|         |          |         |
|---------|----------|---------|
| Eml2    | Fibcd1   | Gpr153  |
| Emp2    | Fkbp9    | Gpr3    |
| Epha10  | Flt1     | Gpr4    |
| Ephx2   | Fn1      | Gpr64   |
| Epor    | Fndc5    | Gpr68   |
| Erb2    | Fosl1    | Gpr75   |
| Esam    | Foxf1a   | Gpr83   |
| Esrp1   | Foxp2    | Gpx7    |
| Esyt3   | Frmd4a   | Gramd1b |
| Eya2    | Frmd4b   | Grb10   |
| F2rl1   | Fsd1     | Greb1   |
| Fabp3   | Fstl1    | Grhl2   |
| Fam101a | Fstl3    | Grhl3   |
| Fam101b | Fut1     | Grik5   |
| Fam123a | Fxyd6    | Grin1   |
| Fam163a | Fxyd7    | Grin2c  |
| Fam164c | Gabbr2   | Grin3b  |
| Fam187b | Gabrb3   | Grip2   |
| Fam18a  | Gabrd    | Grrp1   |
| Fam20a  | Galnt1   | Gsdma   |
| Fam59b  | Galr2    | Gsg1l   |
| Fam70a  | Gas6     | Gspt2   |
| Fam83f  | Gatm     | Gstm5   |
| Fam83h  | Gbx1     | H2-Q10  |
| Fam84a  | Gcgr     | H2-Q6   |
| Fam89a  | Gda      | H2-Q7   |
| Fbln2   | Gdf7     | H2-Q8   |
| Fbln5   | Gfi1b    | H2afy2  |
| Fbn2    | Ggn      | H60b    |
| Fbxo39  | Ggt1     | Has3    |
| Fcna    | Ghsr     | Hck     |
| Fermt2  | Gipc3    | Hctr1   |
| Fes     | Gipr     | Hic1    |
| Fgd5    | Glac     | Hlf     |
| Fgf17   | Gli1     | Hoxb1   |
| Fgf21   | Glis1    | Hoxb3   |
| Fgf3    | Glp1r    | Hpca    |
| Fgf8    | Glit28d2 | Hpse2   |
| Fgf9    | Gnal     | Hrasls5 |
| Fgfr1   | Gnas     | Hsd17b1 |
| Fgl2    | Gnl2     | Hspa12a |
| Fhdc1   | Gpc3     | Hspb1   |
| Fhod3   | Gpm6b    | Hspg2   |

Htra3  
Htra4  
Ica1  
Igdcc4  
Igf1  
Igf2  
Igfbp4  
Igfbp1  
Ihh  
Il11ra1  
Il28ra  
Il31ra  
Il6ra  
Insl3  
Insm2  
Insrr  
Intu  
Irs3  
Isl2  
Itga11  
Jam2  
Jam3  
Jph3  
Jph4  
Jsrp1  
Kank3  
Kank4  
Kcna6  
Kcnb1  
Kcnd3  
Kcnh1  
Kcnh4  
Kcnh6  
Kcnj10  
Kcnj8  
Kcnj9  
Kcnk13  
Kcnk4  
Kcns1  
Kcnt1  
Kcp  
Kdelr3  
Kif27

Kirrel  
Kirrel3  
Kitl  
Klhl29  
Kremen2  
Krt18  
Krt8  
Krt83  
Lama5  
Lamb1  
Lamc2  
Lamc3  
Lbx2  
Lfng  
Lhb  
Lhx2  
Lhx3  
Lhx9  
Lin52  
Lingo3  
Lmf1  
Loxl2  
Loxl4  
Lpcat2  
Lphn3  
Lpl  
Lrig3  
Lrp4  
Lrrc34  
Lrrc4b  
Lrrk1  
Lrrn2  
Lrrtm1  
Ltbp2  
Ltbp3  
Ltbp4  
Ltbr  
Ly6g6c  
Lypd6b  
Magi2  
Mamld1  
Maneal  
Mapk12

Mapk15  
Mapk8ip1  
Mapt  
Mast1  
Matk  
Mcc  
Mctp1  
Mdk  
Me1  
Megf11  
Mertk  
Mfap2  
Mfsd7a  
Mlf1  
Mlxipl  
Mmp11  
Mmp15  
Mmp23  
Mmp24  
Mmp25  
Mmp9  
Mobp  
Mogat1  
Morc4  
Morn4  
Mospd4  
Mrap2  
Mrc2  
Msi1  
Msr3  
Mt1  
Mt2  
Mtmr11  
Mtus2  
Muc1  
Mybpc2  
Myh11  
Mylk  
Myo5c  
Mypop  
Myrip  
Nacad  
Nags

|          |         |         |
|----------|---------|---------|
| Nanos2   | Oprd1   | Pkia    |
| Naprt1   | Osbp16  | Pkib    |
| Nat14    | Ostm1   | Plbd1   |
| Nav1     | Otop1   | Plch2   |
| Nav2     | Otop3   | Pld1    |
| Nbl1     | Ovol1   | Plek2   |
| Nccrp1   | Oxct2a  | Plekhg5 |
| Ndufa4l2 | Oxtr    | Plekhg6 |
| Nbl      | P2rx2   | Plin5   |
| Nefl     | P2rx5   | Plip    |
| Nefm     | P4ha2   | Pltp    |
| Nes      | P4ha3   | Plvap   |
| Neurog2  | Panx2   | Plxna2  |
| Neurog3  | Papln   | Plxna4  |
| Nexn     | Papolb  | Plxnb2  |
| Nfatc2   | Parm1   | Pmp22   |
| Ngb      | Parvb   | Pnoc    |
| Ngfr     | Pax5    | Pnpla8  |
| Nhlh1    | Pax7    | Ppl     |
| Nhlrc4   | Pax8    | Ppm1j   |
| Nhsl2    | Pcdh10  | Ppm1n   |
| Nid2     | Pcdh17  | Ppp1r1a |
| Nkain1   | Pcxl2   | Prdm8   |
| Nkpd1    | Pcsk4   | Prex2   |
| Nkx6-2   | Pcsk6   | Prlr    |
| Nlrp6    | Pcsk9   | Prmt8   |
| Nnat     | Pde10a  | Procr   |
| Nodal    | Pde11a  | Prokr2  |
| Nol3     | Pde4b   | Prox1   |
| Nos2     | Pde4dip | Prph    |
| Nova2    | Pde8b   | Prr18   |
| Npas1    | Pdia2   | Prrt4   |
| Nppc     | Pdlim4  | Prss23  |
| Nrbp2    | Pdzd2   | Prss50  |
| Nrp2     | Penk    | Psd2    |
| Nrxn2    | Pfdn4   | Ptch2   |
| Nt5e     | Phf21a  | Ptgs1   |
| Ntf5     | Phldb1  | Pth1r   |
| Ntn3     | Phyhip  | Ptpn5   |
| Nxph4    | Pitpnm3 | Ptpre   |
| Odz1     | Pitx2   | Ptpn    |
| Olfm2    | Pitx3   | Ptpn2   |
| Onecut3  | Pkdrej  | Ptpro   |

|          |          |            |
|----------|----------|------------|
| Ptrf     | Rtn4rl2  | Slc26a10   |
| Rab31    | Rundc3a  | Slc27a3    |
| Rab37    | Ryr3     | Slc29a4    |
| Rab39b   | S1pr1    | Slc38a8    |
| Ramp2    | S1pr5    | Slc40a1    |
| Rap1gap  | Sacs     | Slc45a1    |
| Rap1gap2 | Sall2    | Slc47a2    |
| Rapgef4  | Samd14   | Slc4a10    |
| Rarg     | Samhd1   | Slc5a5     |
| Rasgef1a | Scamp5   | Slc6a13    |
| Rasgrf2  | Scd1     | Slc6a3     |
| Rasl10a  | Scml2    | Slc6a7     |
| Rasl11a  | Scn1b    | Slc7a2     |
| Rbms3    | Scn3b    | Slc7a8     |
| Rbp1     | Scnn1a   | Slit1      |
| Rbpjl    | Scube1   | Slit2      |
| Rcn3     | Sdk2     | Slitrk5    |
| Rd3      | Sec14l2  | Smagp      |
| Reep6    | Sec31b   | Smarcd3    |
| Rem1     | Sema4f   | Smug1      |
| Rftn2    | Serpib6a | Sned1      |
| Rfx4     | Sfn      | Snx22      |
| Rgl3     | Sfrp5    | Sorbs3     |
| Rgma     | Sgk1     | Sox8       |
| Rgnef    | Sgpp2    | Sp6        |
| Rgs11    | Sh3rf3   | Sphk1      |
| Rgs16    | Shank1   | Spnb3      |
| Rhbdf1   | Shd      | Spock2     |
| Rhoc     | She      | Spon1      |
| Rhod     | Shisa2   | Spred3     |
| Rhoj     | Shisa3   | Sprn       |
| Rin1     | Shisa4   | Srms       |
| Ripk4    | Shisa7   | St14       |
| Rnd1     | Sim2     | St6galnac2 |
| Rnf207   | Sirpa    | St6galnac5 |
| Rnf208   | Skor1    | Stab1      |
| Rora     | Slc12a5  | Stac2      |
| Rpp25    | Slc15a1  | Stard13    |
| Rps27    | Slc15a4  | Stc2       |
| Rspo1    | Slc16a11 | Stmn3      |
| Rspo4    | Slc16a8  | Stmn4      |
| Rtbdn    | Slc1a2   | Stra6      |
| Rtn2     | Slc24a1  | Stx3       |

Stxbp5l  
Sulf2  
Sv2c  
Syn1  
Sync  
Syp  
Sypl2  
Sys1  
Syt15  
Syt2  
Syt6  
Sytl4  
Tbc1d9  
Tbr1  
Tbx2  
Tbx3  
Tcf15  
Tchh  
Tdrd6  
Tead2  
Tgfb2  
Tgfbi  
Tgm2  
Thbd  
Thbs1  
Timp3  
Tmc5  
Tmc7  
Tmcc3  
Tmem130  
Tmem136  
Tmem146  
Tmem200b  
Tmem45b  
Tmem59l  
Tmem91  
Tmod1  
Tmtc1  
Tnfaip2  
Tnfrsf25  
Tnfsf12  
Tnfsf13b  
Tnrc18

Tom11l  
Tpm1  
Tpm2  
Tppp3  
Trim15  
Trim2  
Trim29  
Trim36  
Triobp  
Trpc5  
Trpv4  
Tshz2  
Tspan17  
Tssk3  
Ttc34  
Ttc9b  
Ttl19  
Ttyh1  
Ttyh2  
Tub  
Tubb6  
Tulp1  
Ubd  
Uchl1  
Ugg2  
Unc13b  
Unc80  
Usp13  
Vax2  
Vgf  
Vill  
Vipr1  
Vps25  
Vsnl1  
Vsx2  
Vwa2  
Vwa5b2  
Wdfy3  
Wdr54  
Wdr63  
Wipf1  
Wipf3  
Wnk4

Wnt10b  
Wnt2b  
Wnt3  
Wnt4  
Wnt5a  
Wnt7b  
Xkr7  
Zbtb7b  
Zbtb8b  
Zcchc14  
Zdhhc22  
Zfp296  
Zfp462  
Zfp536  
Zfp57  
Zfp9  
Zic1  
Zkscan2  
Zmynd15

**H3K4me3<sup>hi</sup> H3K27me3<sup>hi</sup>  
(bivalent)**

1110032F04Rik  
1110067D22Rik  
1700008O03Rik  
1700019E19Rik  
1810027O10Rik  
2010011I20Rik  
2010300C02Rik  
2410022L05Rik  
2610019F03Rik  
2610109H07Rik  
2700081O15Rik  
2810055F11Rik  
5031414D18Rik  
5730528L13Rik  
6330512M04Rik  
6430548M08Rik  
6820408C15Rik  
8430427H17Rik  
9030025P20Rik  
9030612E09Rik  
9330182L06Rik  
9430020K01Rik  
9830001H06Rik  
A930038C07Rik  
Aatf  
Abat  
Abca3  
Abca5  
Abcb10  
Abhd5  
Abhd6  
Ablim2  
Abr  
Acan  
Acbd4  
Acer2  
Acot1  
Acp1  
Actr3b  
Acvr1

Acvr2a  
Acvr2b  
Adam15  
Adamts14  
Adamts7  
Adap1  
Adarb1  
Adc  
Adcy9  
Adora2b  
Adrbk2  
Afap11  
Agap1  
Agnat9  
Ahnak  
Ak4  
Alcam  
Aldh5a1  
Alg11  
Als2cl  
Amigo1  
Amigo2  
Ank  
Ankrd27  
Ankrd34a  
Ankrd42  
Ankrd6  
Anks6  
Antxr1  
Apba1  
Apbb1  
Apbb2  
Apc2  
Aplp1  
Aplp2  
Apoo  
App  
Arg2  
Arhgap20  
Arhgap26  
Arhgap27  
Arhgap39  
Arhgef12

Arhgef17  
Arvcf  
Asap2  
Asap3  
Atf6  
Atp11a  
Atp1b2  
Atp5d  
Atp7b  
Auts2  
B230120H23Rik  
B3gnt3  
B3gnt4  
Bace1  
Bag3  
Bahd1  
Bai2  
Bambi  
Bbc3  
BC022687  
BC068281  
Bcl11a  
Bcl2l11  
Bcor  
Bcorl1  
Bcr  
Bend6  
Bex1  
Bhlhe40  
Bhlhe41  
Bicd1  
Bik  
Blvrb  
Bmp1  
Bmp8a  
Bmpr1a  
Bmpr2  
Brsk2  
Bsn  
Btbd11  
Btbd3  
Bzrap1  
C1ql3

|               |               |               |
|---------------|---------------|---------------|
| C2cd4a        | Chchd7        | Dcbld2        |
| C530028O21Rik | Chd7          | Dchs1         |
| C85492        | Chic1         | Dctn3         |
| Cabp1         | Chn1          | Ddx25         |
| Cacna1b       | Chpf          | Ddx3y         |
| Cacnb2        | Cish          | Ddx43         |
| Cacnb3        | Cited1        | Dennd2a       |
| Cacng4        | Cited4        | Dennd5a       |
| Cadm1         | Ckap4         | Dennd5b       |
| Cadm4         | Ckb           | Depdc7        |
| Camk2n1       | Ckmt1         | Dgcr14        |
| Camk2n2       | Clcf1         | Dgkh          |
| Car14         | Clec11a       | Dlgap4        |
| Car2          | Clip4         | DIk2          |
| Car8          | Clock         | Dll1          |
| Card10        | Clstn1        | Dlx1          |
| Caskin1       | Cmtm8         | Dmwd          |
| Cbs           | Cnm1          | Dnaja4        |
| Cbx2          | Cnm2          | Dnajc6        |
| Cbx4          | Cntnap1       | Dnm1          |
| Cbx8          | Coasy         | Dnm3          |
| Ccdc102a      | Cobll1        | Dock3         |
| Ccdc112       | Col23a1       | Dock4         |
| Ccdc40        | Col27a1       | Dock7         |
| Ccdc46        | Coro2a        | Dock8         |
| Ccnd2         | Cpd           | Dok4          |
| Ccno          | Cpm           | Dok7          |
| Cd151         | Cpne2         | Dos           |
| Cd3eap        | Cryzl1        | Dpysl5        |
| Cd44          | Cspg5         | Dse           |
| Cd9           | Csrp2         | Dsp           |
| Cdc14b        | Ctbp2         | Dst           |
| Cdc40         | Ctnna1        | Dstn          |
| Cdc42bpa      | Cttnbp2nl     | Dtx4          |
| Cdh1          | Cux2          | Dusp14        |
| Cdk14         | Cxadr         | Dusp8         |
| Cdkn2a        | Cyfp1         | Dynlt1b       |
| Cdr2l         | D430041D05Rik | E030030I06Rik |
| Cebpa         | D730039F16Rik | E130012A19Rik |
| Cecr2         | Daam1         | E330016A19Rik |
| Cenpv         | Dact1         | Ebf3          |
| Cgn           | Dbnidd1       | Eda           |
| Ch25h         | Dcbld1        | Efemp2        |

|           |        |         |
|-----------|--------|---------|
| Efna2     | Fam43a | Gab2    |
| Efnb1     | Fam46a | Gadd45b |
| Efnb2     | Fam46c | Gas2l1  |
| Efr3b     | Farp1  | Gas8    |
| Egr2      | Fat4   | Gata3   |
| Egr3      | Fbln1  | Gbf1    |
| Eid2      | Fbxl15 | Gcat    |
| Eif4ebp1  | Fbxo2  | Gdf1    |
| Ell2      | Fbxo27 | Gdf11   |
| Elovl2    | Fbxo43 | Gdpd5   |
| Elovl7    | Fbxo44 | Gem     |
| Emilin2   | Fbxw8  | Gfpt2   |
| Eml6      | Fgd1   | Gfra1   |
| Endod1    | Fgd4   | Ghr     |
| Enpp1     | Fgfbp3 | Gja1    |
| Epas1     | Fgfr3  | Gjc1    |
| Epb4.1l1  | Fhl1   | Gjd3    |
| Epb4.1l4a | Fjx1   | Gkap1   |
| Epb4.1l4b | Fkbp10 | Glis2   |
| Epb4.1l5  | Fkbp11 | Glis3   |
| Epdr1     | Fkbp1b | Gls2    |
| Ephx4     | Flnb   | Gnao1   |
| Epn2      | Flot1  | Gnaz    |
| Ercc1     | Fmn2   | Gnb4    |
| Espn      | Fmnl2  | Gng4    |
| Esrp2     | Fnbp1l | Golm1   |
| Etnk2     | Fndc3b | Gp5     |
| Etv4      | Fos    | Gpc1    |
| Evl       | Fosl2  | Gpr124  |
| F2r       | Foxb1  | Gpr125  |
| Fads3     | Foxc1  | Gpr156  |
| Fam102a   | Foxd2  | Gpr25   |
| Fam114a1  | Foxj1  | Gpr85   |
| Fam129b   | Frmd5  | Gprc5b  |
| Fam131a   | Fscn1  | Grasp   |
| Fam131b   | Fstl4  | Grhl1   |
| Fam159b   | Fut4   | Gria2   |
| Fam164a   | Fzd10  | Grin2d  |
| Fam169a   | Fzd3   | Grm4    |
| Fam171a2  | Fzd6   | Grm6    |
| Fam174b   | Fzd7   | Grtp1   |
| Fam184a   | Fzd9   | Grwd1   |
| Fam184b   | Gab1   | Gsto1   |



|         |         |         |
|---------|---------|---------|
| Gstt3   | Ina     | Klf4    |
| Gucy1b3 | Inf2    | Klf5    |
| Gucy2e  | Inha    | Klf9    |
| Gvin1   | Inpp1   | Klhl32  |
| Gylt1b  | lqsec2  | Klhl35  |
| H1fx    | Irak3   | Klk8    |
| H2-Ab1  | Irf4    | Klrg2   |
| Hap1    | Irf5    | Kpna1   |
| Hbegf   | Irf8    | Ksr2    |
| Hcn1    | Irs1    | Lag3    |
| Hcn2    | Ism1    | Lamc1   |
| Hdgfrp3 | Itga3   | Large   |
| Hecw2   | Itga9   | Lass1   |
| Hes1    | Itgb5   | Lats2   |
| Hey1    | Itpka   | Lca5l   |
| Heyl    | Itsn1   | Ldlrap1 |
| Hmcn1   | Jag1    | Leng9   |
| Hmgn3   | Jag2    | Lgr4    |
| Hoxa3   | Jazf1   | Lhfpl2  |
| Hoxa4   | Jdp2    | Lin28b  |
| Hoxa6   | Jkamp   | Lin7b   |
| Hoxa7   | Jub     | Lipg    |
| Hoxb4   | Jup     | Lix1l   |
| Hpd1    | Kalrn   | Lmbr1   |
| Hr      | Kazald1 | Lmo7    |
| Hrh3    | Kcna2   | Lmtk2   |
| Hs1bp3  | Kcnab3  | Lmtk3   |
| Hsd11b2 | Kcnc1   | Lmx1b   |
| Hspa1b  | Kcng3   | Lonrf3  |
| Hspa1l  | Kcnh3   | Lphn2   |
| Hspa2   | Kcnh8   | Lrp11   |
| Htr1b   | Kcnk6   | Lrrc16a |
| Hunk    | Kdelr1  | Lrrc16b |
| Ica1l   | Khdrbs3 | Lrrc3b  |
| Icam5   | Kif13a  | Lrrc4   |
| Icosl   | Kif1b   | Lrrfip1 |
| Id1     | Kif26b  | Lrrn4   |
| Id2     | Kif5a   | Lrtm2   |
| Ier3    | Kif5c   | Ltk     |
| Ier5l   | Kifc3   | Luzp1   |
| Igf1r   | Kit     | Lyn     |
| Igf2bp2 | Klc2    | Lypd1   |
| Igf2bp3 | Klf2    | Lysmd2  |

|          |         |          |
|----------|---------|----------|
| Mab21l2  | Mtss1l  | Nuak1    |
| Macf1    | Mycl1   | Nuak2    |
| MacroD2  | Mycn    | Nxn12    |
| Mad2l2   | Myh10   | Oaf      |
| Maf      | Myo1d   | Obsl1    |
| Mafa     | Myo1e   | Olig3    |
| Mafb     | Myo5b   | Optn     |
| Magi1    | Nacc2   | Osbp2    |
| Mamdc4   | Nat8l   | Osbp11a  |
| Man1c1   | Nbea    | Otub2    |
| Map3k9   | Ncam1   | P2ry1    |
| Map6d1   | Nckap1  | Pacsin3  |
| Mapk11   | Ncs1    | Paqr4    |
| Mapre2   | NdrG4   | Pard3b   |
| Mapre3   | Neur11a | Pard6b   |
| 40244    | Nfatc1  | Pbx1     |
| 40245    | Nfe2l3  | Pbx3     |
| Marveld1 | Nfil3   | Pcbp4    |
| Marveld2 | Nfix    | Pcdh7    |
| Mast4    | Nipa1   | Pcgf2    |
| Mcam     | Nkapl   | Pcx      |
| Mdfi     | Nkd1    | Pcyox11  |
| Megf8    | Nkd2    | Pde1b    |
| Meis3    | Nkx2-4  | Pde4a    |
| Mettl1   | Nlgn2   | Pde8a    |
| Mfsd4    | Nln     | Pde9a    |
| Mfsd7c   | Nog     | Pdgfc    |
| Mgat5b   | Nos1ap  | Pdia5    |
| Mical2   | Npas2   | Pdzd7    |
| Mixl1    | Npnt    | Pecr     |
| Mllt4    | Npr1    | Peli2    |
| Mmp14    | Nr2f6   | Peli3    |
| Mmp17    | Nr3c2   | Pfn2     |
| Mn1      | Nr4a2   | Phf10    |
| Mos      | Nr4a3   | Phf21b   |
| Mpg      | Nr6a1   | Phlpp1   |
| Mpped2   | Nrg4    | Phospho1 |
| Mpzl2    | Nrip3   | Phpt1    |
| Mras     | Nrtn    | Pigz     |
| Mreg     | Nsg1    | Pik3cb   |
| Mtap1a   | Ntn1    | Pkdcc    |
| Mtap1b   | Ntng2   | Plag1    |
| Mtap7    | Ntrk3   | Plagl1   |

|          |           |         |
|----------|-----------|---------|
| Plau     | Prr5      | Rgag4   |
| Plbd2    | Prss16    | Rgmb    |
| Plcd3    | Psd       | Rgs9bp  |
| Plcg2    | Psmb3     | Rhbdl3  |
| Plch1    | Pstpip2   | Rhob    |
| Pld2     | Ptgfrn    | Rhobtb1 |
| Plec     | Ptk2      | Rhobtb3 |
| Plekha8  | Ptpn13    | Rhoq    |
| Plekhf1  | Ptpn14    | Rhpn2   |
| Plekhh1  | Ptpn21    | Rimkla  |
| Plekhh3  | Ptpn3     | Rims3   |
| Plk2     | Ptprk     | Rnf150  |
| Pls1     | Ptprs     | Rnf180  |
| Plxna1   | Ptpru     | Rnf216  |
| Plxnc1   | Pus3      | Rnf220  |
| Pm20d2   | Pvrl3     | Rnf38   |
| Pmaip1   | Rab11fip3 | Rnf39   |
| Pnmal2   | Rab15     | Rsrc1   |
| Podxl    | Rab20     | Rtkn    |
| Podxl2   | Rab30     | Rtn4rl1 |
| Polr2l   | Rab34     | Rufy4   |
| Polr3gl  | Rab39     | Rusc1   |
| Pop5     | Rab3b     | Rusc2   |
| Porcn    | Rab6b     | Rxra    |
| Pou3f1   | Rac3      | Rybp    |
| Pou4f1   | Racgap1   | Ryk     |
| Ppap2b   | Ranbp17   | Sarm1   |
| Ppfia3   | Raph1     | Sash1   |
| Ppic     | Rasal2    | Satb2   |
| Ppip5k1  | Rasd1     | Scamp1  |
| Ppm1l    | Rasgef1b  | Scara3  |
| Ppp1r13l | Rasip1    | Scin    |
| Ppp1r1b  | Rasl10b   | Scn4b   |
| Prdm1    | Rassf5    | Scn5a   |
| Prdm16   | Rassf8    | Scn8a   |
| Prkaa2   | Raver2    | Scube3  |
| Prkag2   | Rbm20     | Sdc1    |
| Prkar2a  | Rbm24     | Sdc3    |
| Prkce    | Rbms1     | Sdc4    |
| Prkcz    | Rbpms     | Sdk1    |
| Proca1   | Rbpms2    | Sema3f  |
| Prodh    | Reep1     | Sema4c  |
| Prom1    | Reln      | Sema4g  |

|          |          |          |
|----------|----------|----------|
| Sema6b   | Slc6a9   | Syne1    |
| Sema6c   | Slc7a4   | Syne2    |
| 40425    | Slc9a3r2 | Syng3    |
| 40428    | Slit3    | Syt16    |
| Serp2    | Smad6    | Syt3     |
| Serpine2 | Smad7    | Sytl3    |
| Sertad4  | Smoc1    | Tanc2    |
| Sfmbt2   | Smpd3    | Tbc1d12  |
| Sfxn5    | Snta1    | Tbc1d16  |
| Sgcb     | Sntb1    | Tbc1d24  |
| Sgce     | Sntb2    | Tbc1d30  |
| Sgms1    | Snx24    | Tbc1d4   |
| Sgtb     | Sobp     | Tbkbp1   |
| Sh2b2    | Socs2    | Tbx21    |
| Sh3bgrl2 | Sorcs2   | Tceal8   |
| Sh3bp4   | Sorl1    | Tcf7l1   |
| Sh3gl3   | Sox12    | Tcp1l1l1 |
| Sh3pxd2b | Sox13    | Tead1    |
| Sh3yl1   | Sox5     | Tead3    |
| Shank3   | Spata13  | Tepp     |
| Shb      | Spats2l  | Tesc     |
| Shmt2    | Spdya    | Thrb     |
| Six5     | Spin4    | Tifa     |
| Skap2    | Spire1   | Tjp2     |
| Slc11a2  | Spire2   | Tmbim1   |
| Slc12a2  | Spnb1    | Tmbim4   |
| Slc16a2  | Spnb2    | Tmcc2    |
| Slc16a3  | Spnb4    | Tmem108  |
| Slc17a7  | Spns2    | Tmem132a |
| Slc18a2  | Spry2    | Tmem135  |
| Slc1a1   | Spsb1    | Tmem150a |
| Slc22a17 | Srcin1   | Tmem150c |
| Slc22a21 | Srgap1   | Tmem158  |
| Slc22a23 | Ssh1     | Tmem159  |
| Slc22a3  | Sspo     | Tmem163  |
| Slc27a2  | Sstr2    | Tmem198  |
| Slc2a8   | St3gal2  | Tmem2    |
| Slc35d3  | St3gal6  | Tmem25   |
| Slc41a2  | Stau2    | Tmem30b  |
| Slc45a3  | Stk39    | Tmem44   |
| Slc4a11  | Stox1    | Tmem51   |
| Slc4a8   | Stx1a    | Tmem8    |
| Slc6a8   | Susd4    | Tmie     |

|           |         |
|-----------|---------|
| Tnfrsf12a | Yes1    |
| Tox2      | Zbtb10  |
| Tox3      | Zbtb16  |
| Tppp      | Zbtb46  |
| Traip     | Zbtb7a  |
| Trim3     | Zbtb8a  |
| Trim7     | Zc3h12c |
| Trio      | Zcchc3  |
| Tro       | Zdhhc2  |
| Trp73     | Zeb2    |
| Trpm4     | Zfhx3   |
| Tsc22d3   | Zfp277  |
| Tshz3     | Zfp316  |
| Tspan18   | Zfp318  |
| Tspan33   | Zfp354b |
| Tspan4    | Zfp428  |
| Tspan9    | Zfp467  |
| Ttc39b    | Zfp518b |
| Ttc8      | Zfp580  |
| Ttll11    | Zfp608  |
| Tyro3     | Zfp711  |
| Ufsp1     | Zfp821  |
| Uhrf1bp1  | Zfp827  |
| Unc13a    | Zfp97   |
| Unc5a     | Zfyve28 |
| Unc5b     | Zkscan4 |
| Ust       | Zswim5  |
| Vash2     | Zswim6  |
| Vcan      | Zxdb    |
| Vdr       |         |
| Vgll4     |         |
| Vldlr     |         |
| Vps37d    |         |
| Vsig10    |         |
| Wasf1     |         |
| Wdr8      |         |
| Wdr86     |         |
| Wnk2      |         |
| Wscd1     |         |
| Wtip      |         |
| Wwc2      |         |
| Xkr6      |         |
| Yap1      |         |
